# Supplementary material for: RNA editing signatures identify melanoma patients who respond to Pembrolizumab or Nivolumab treatment
Source: PubMed Central journal article supplement — Transl Oncol. 2021 Aug 10;14(11):101197. doi: 10.1016/j.tranon.2021.101197 (PMC8363879; doi:10.1016/j.tranon.2021.101197), 2021-08-10
Supplement: mmc1.pdf [file mmc1.pdf]

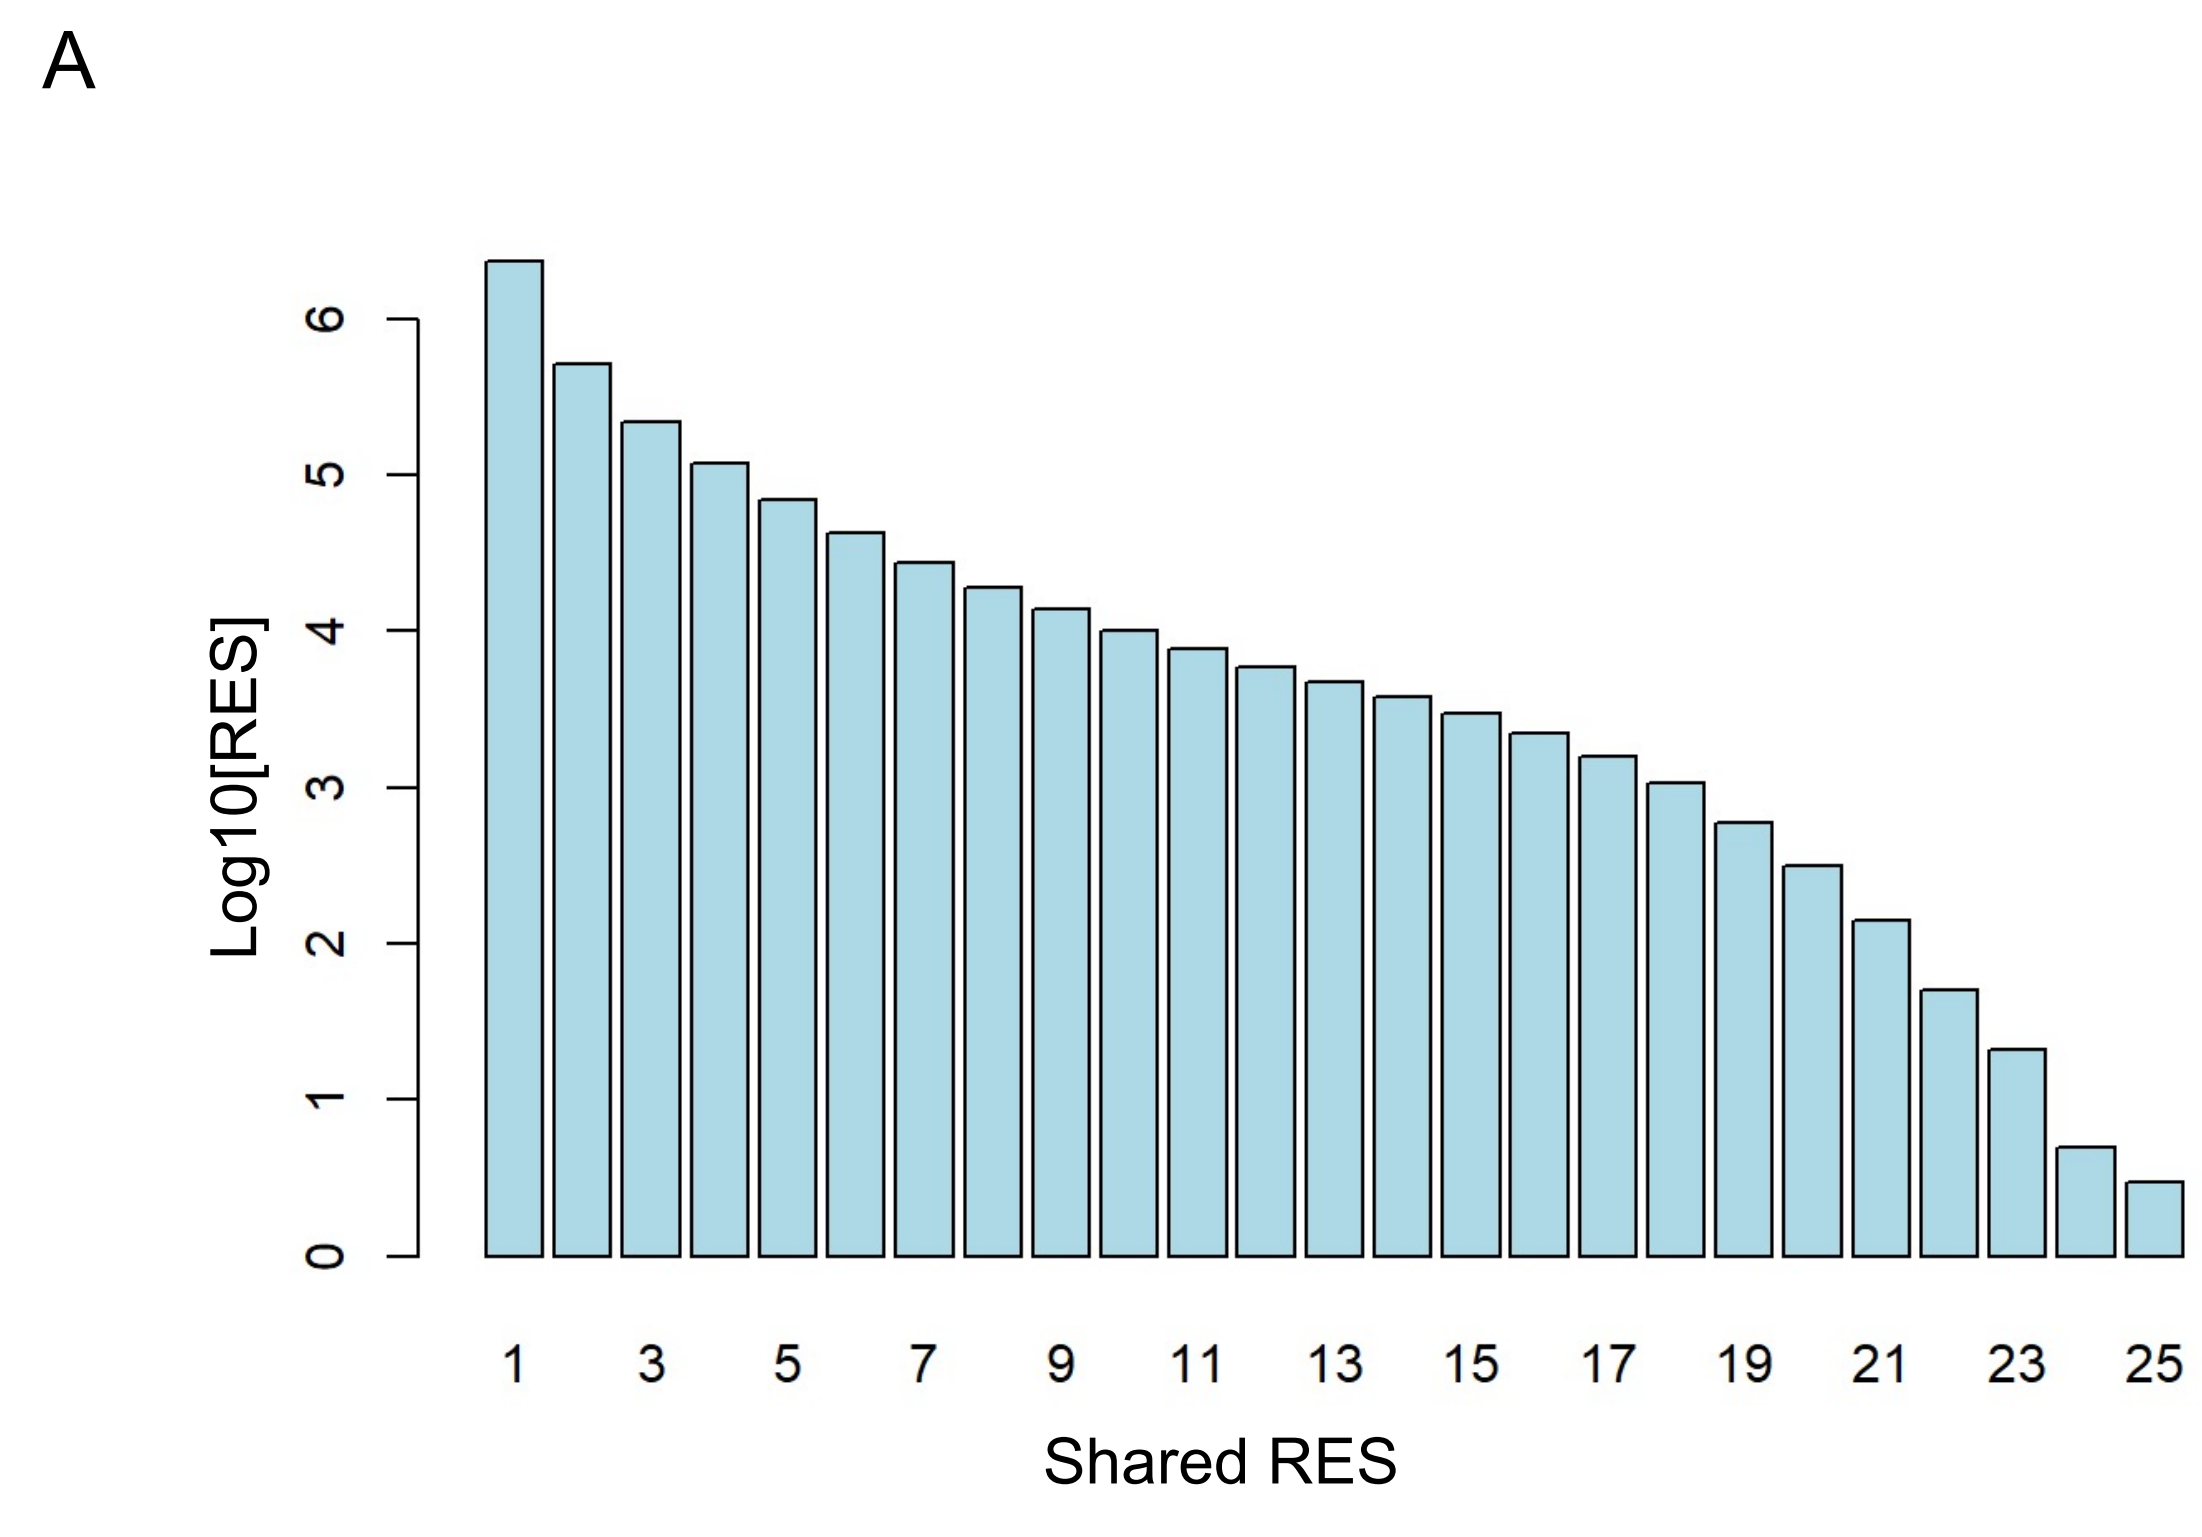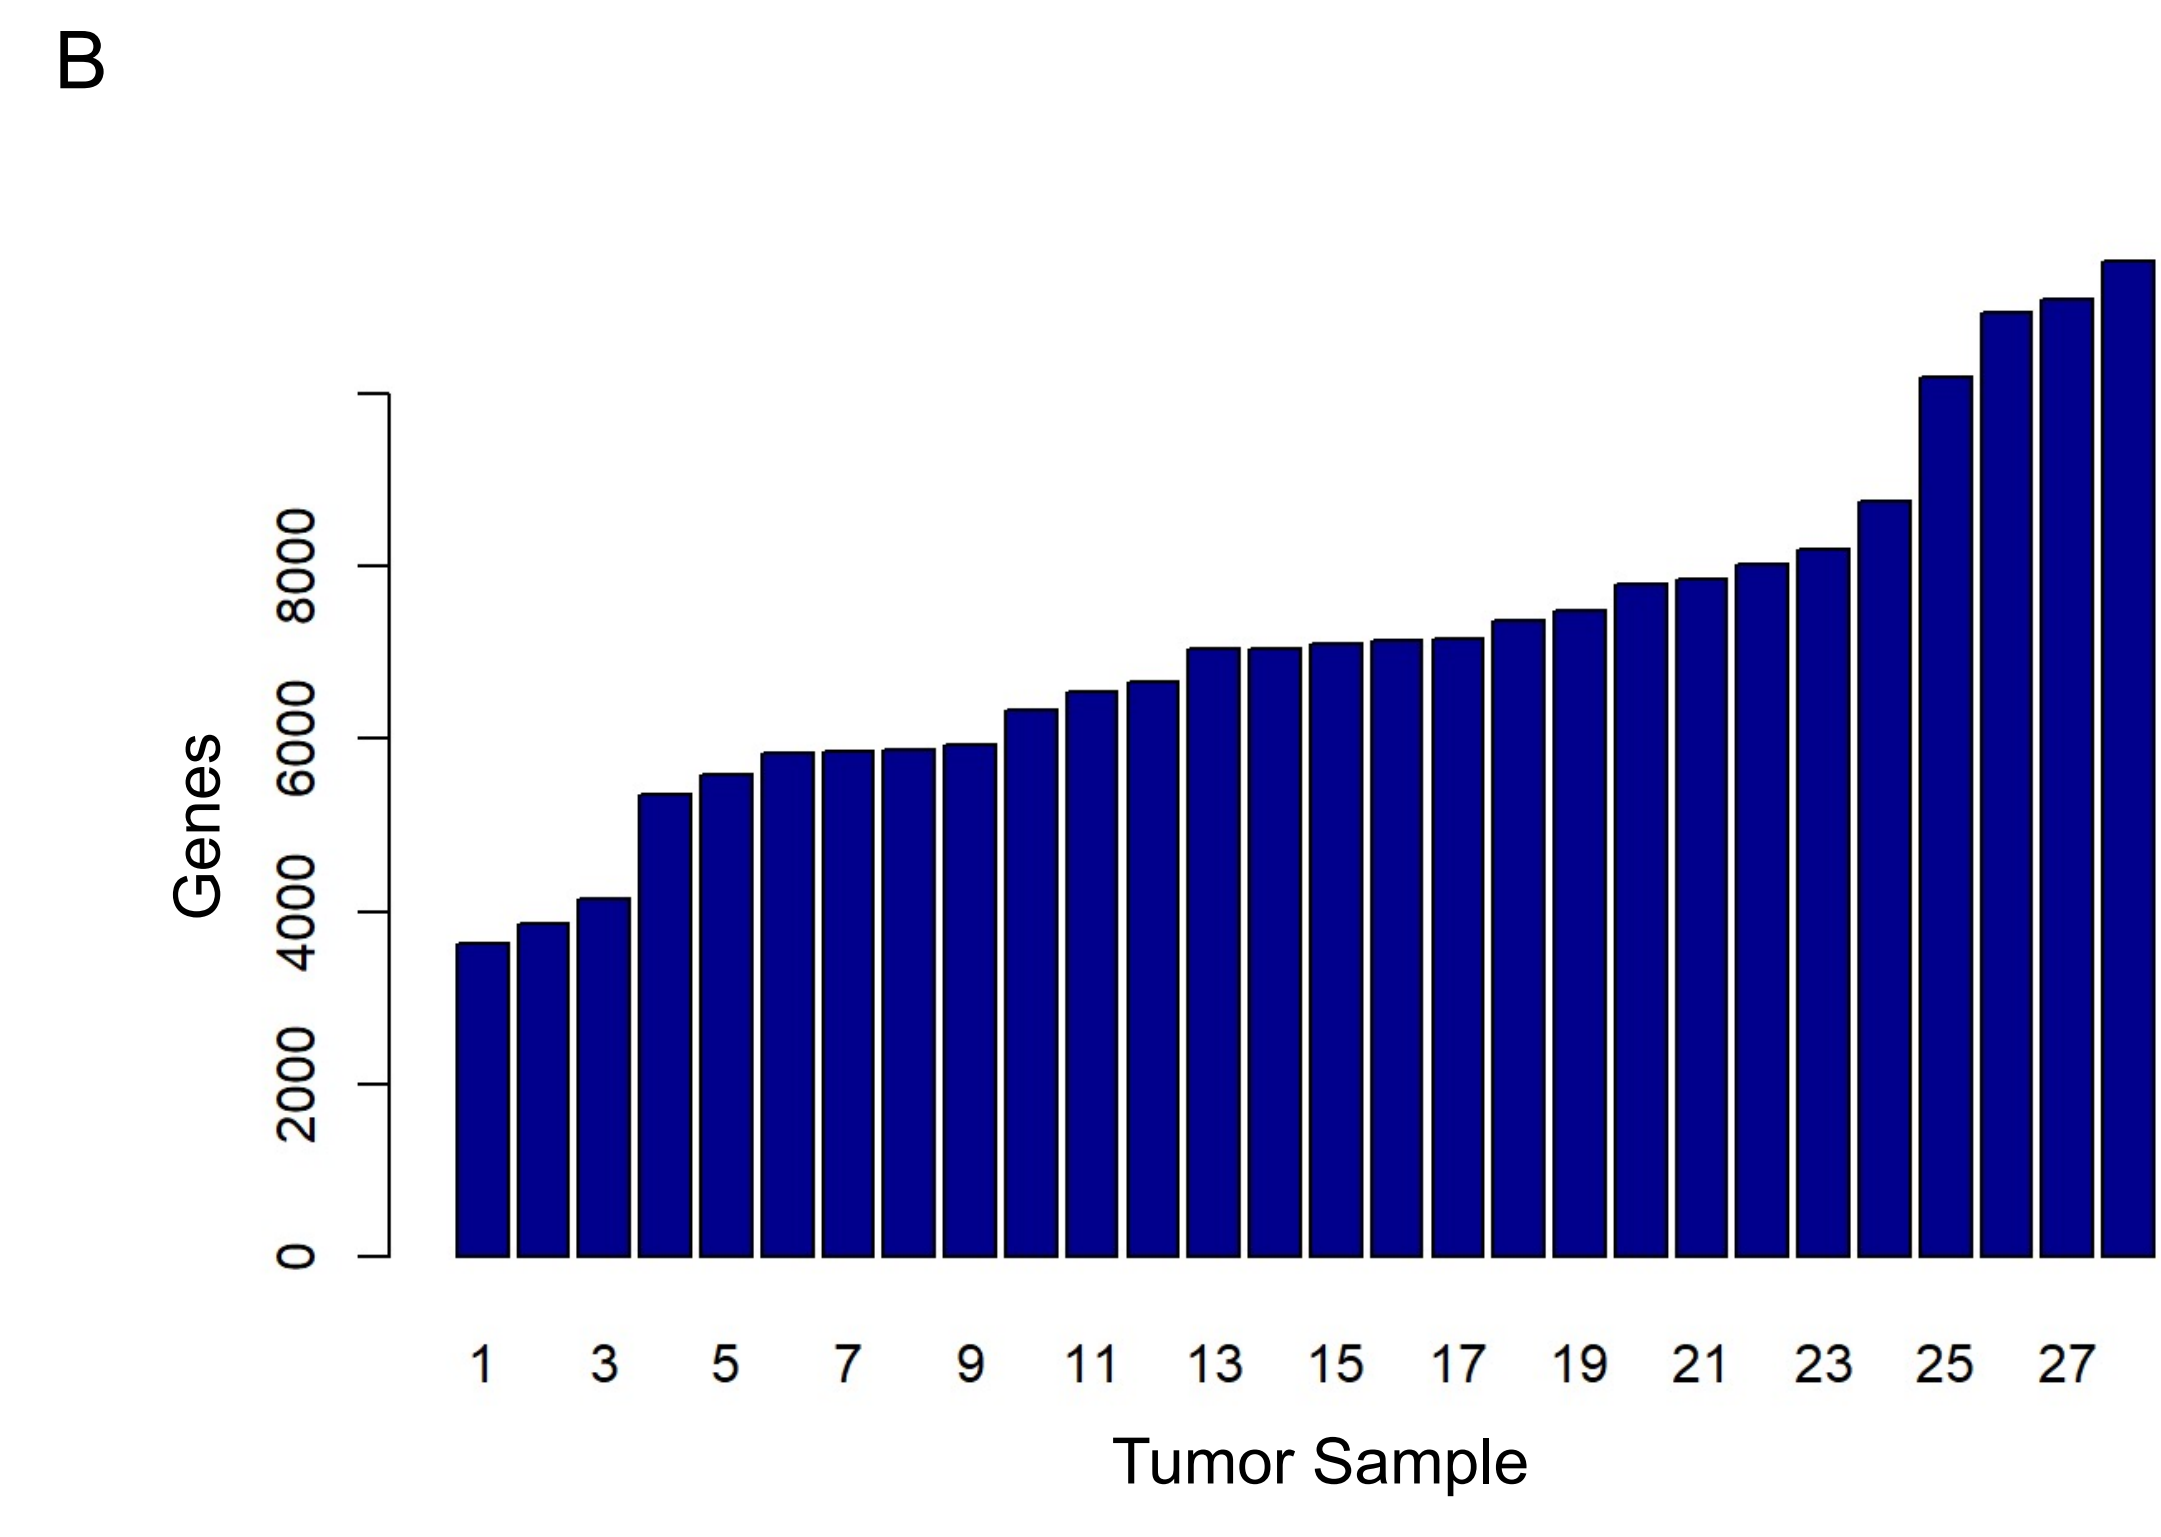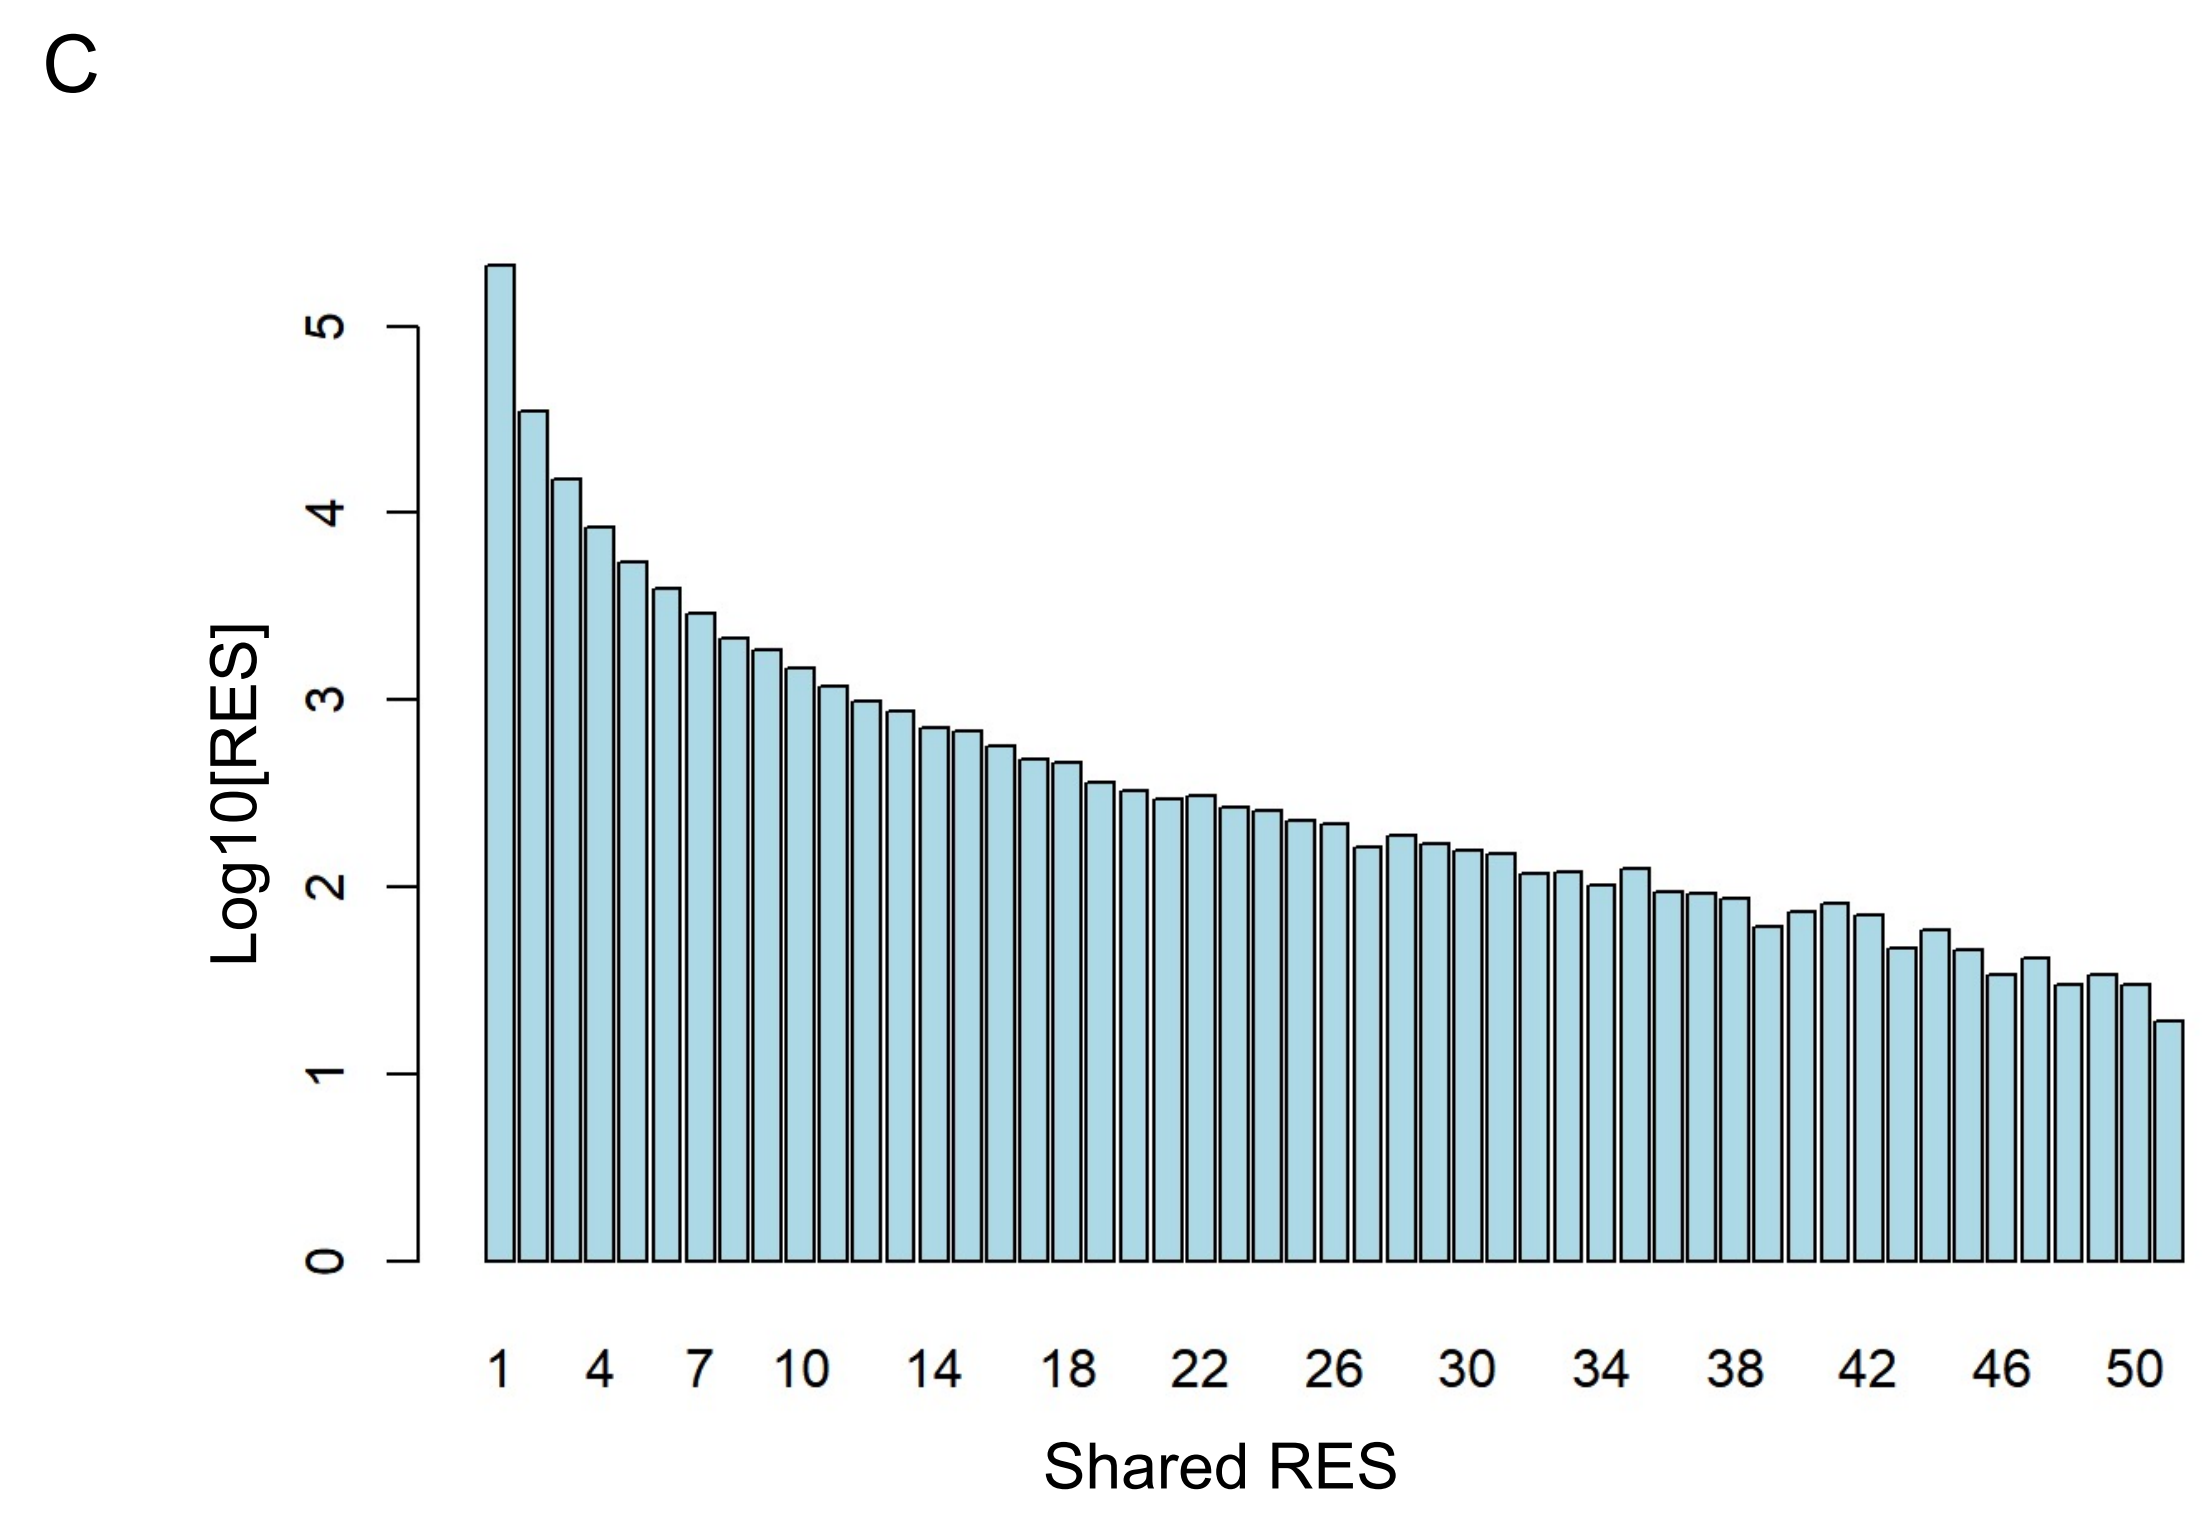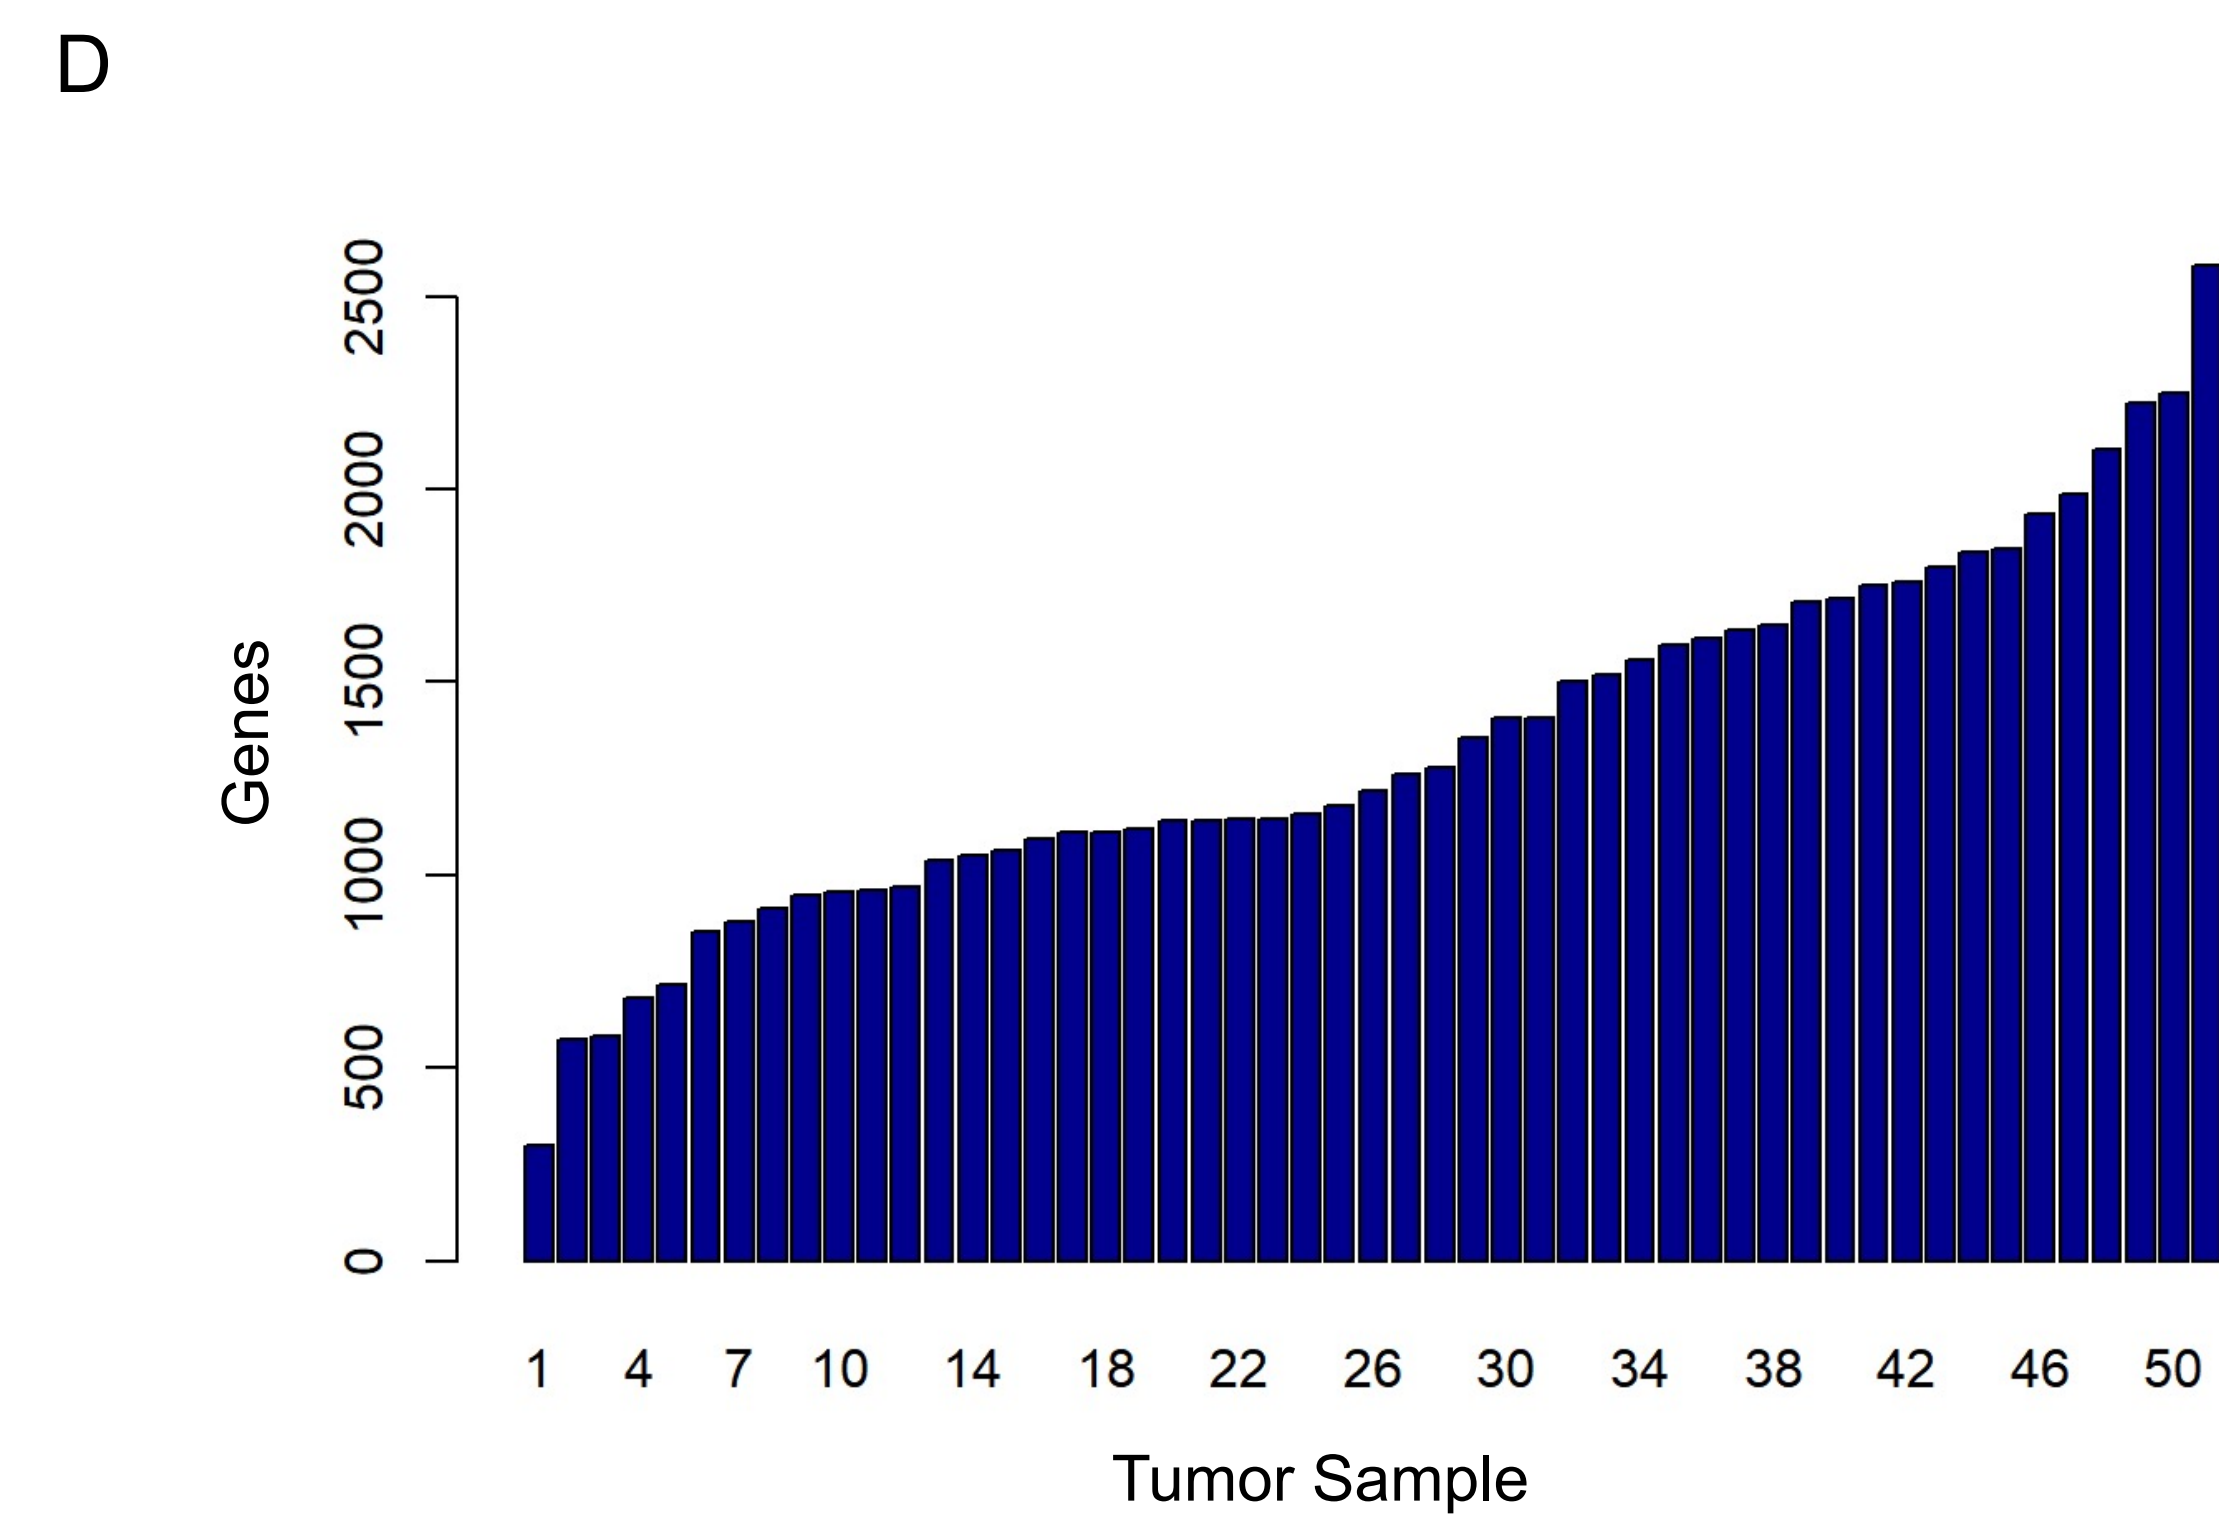

Figure S1

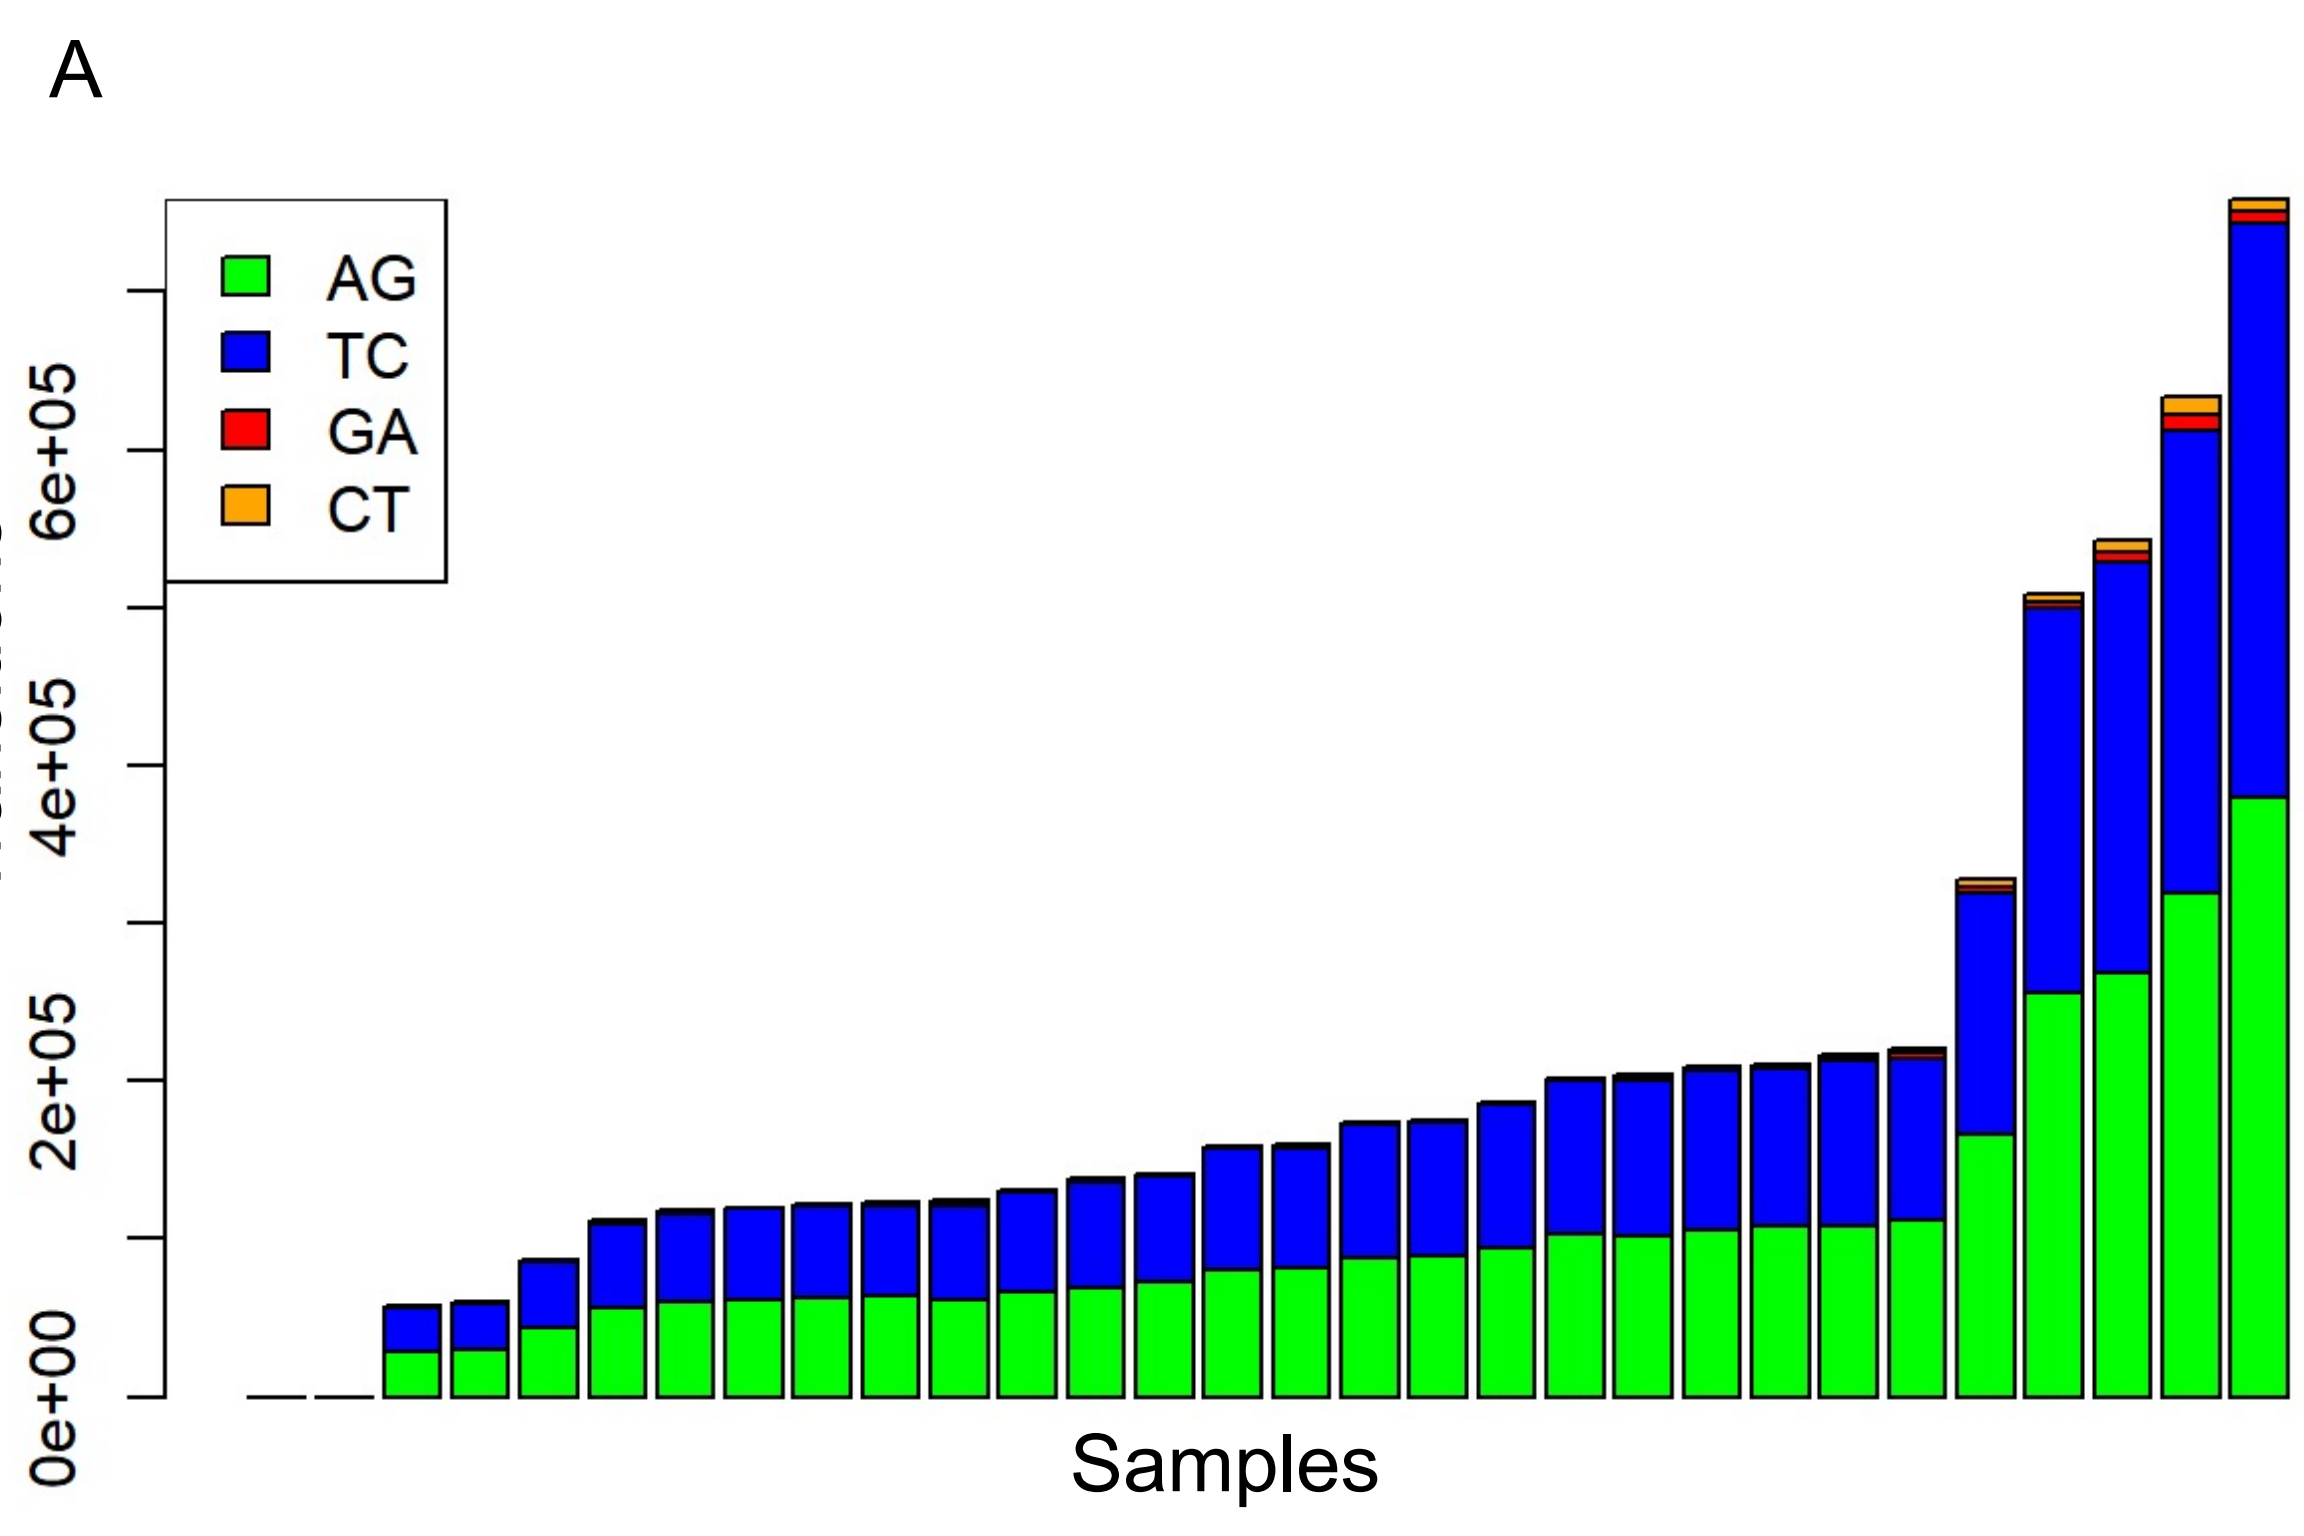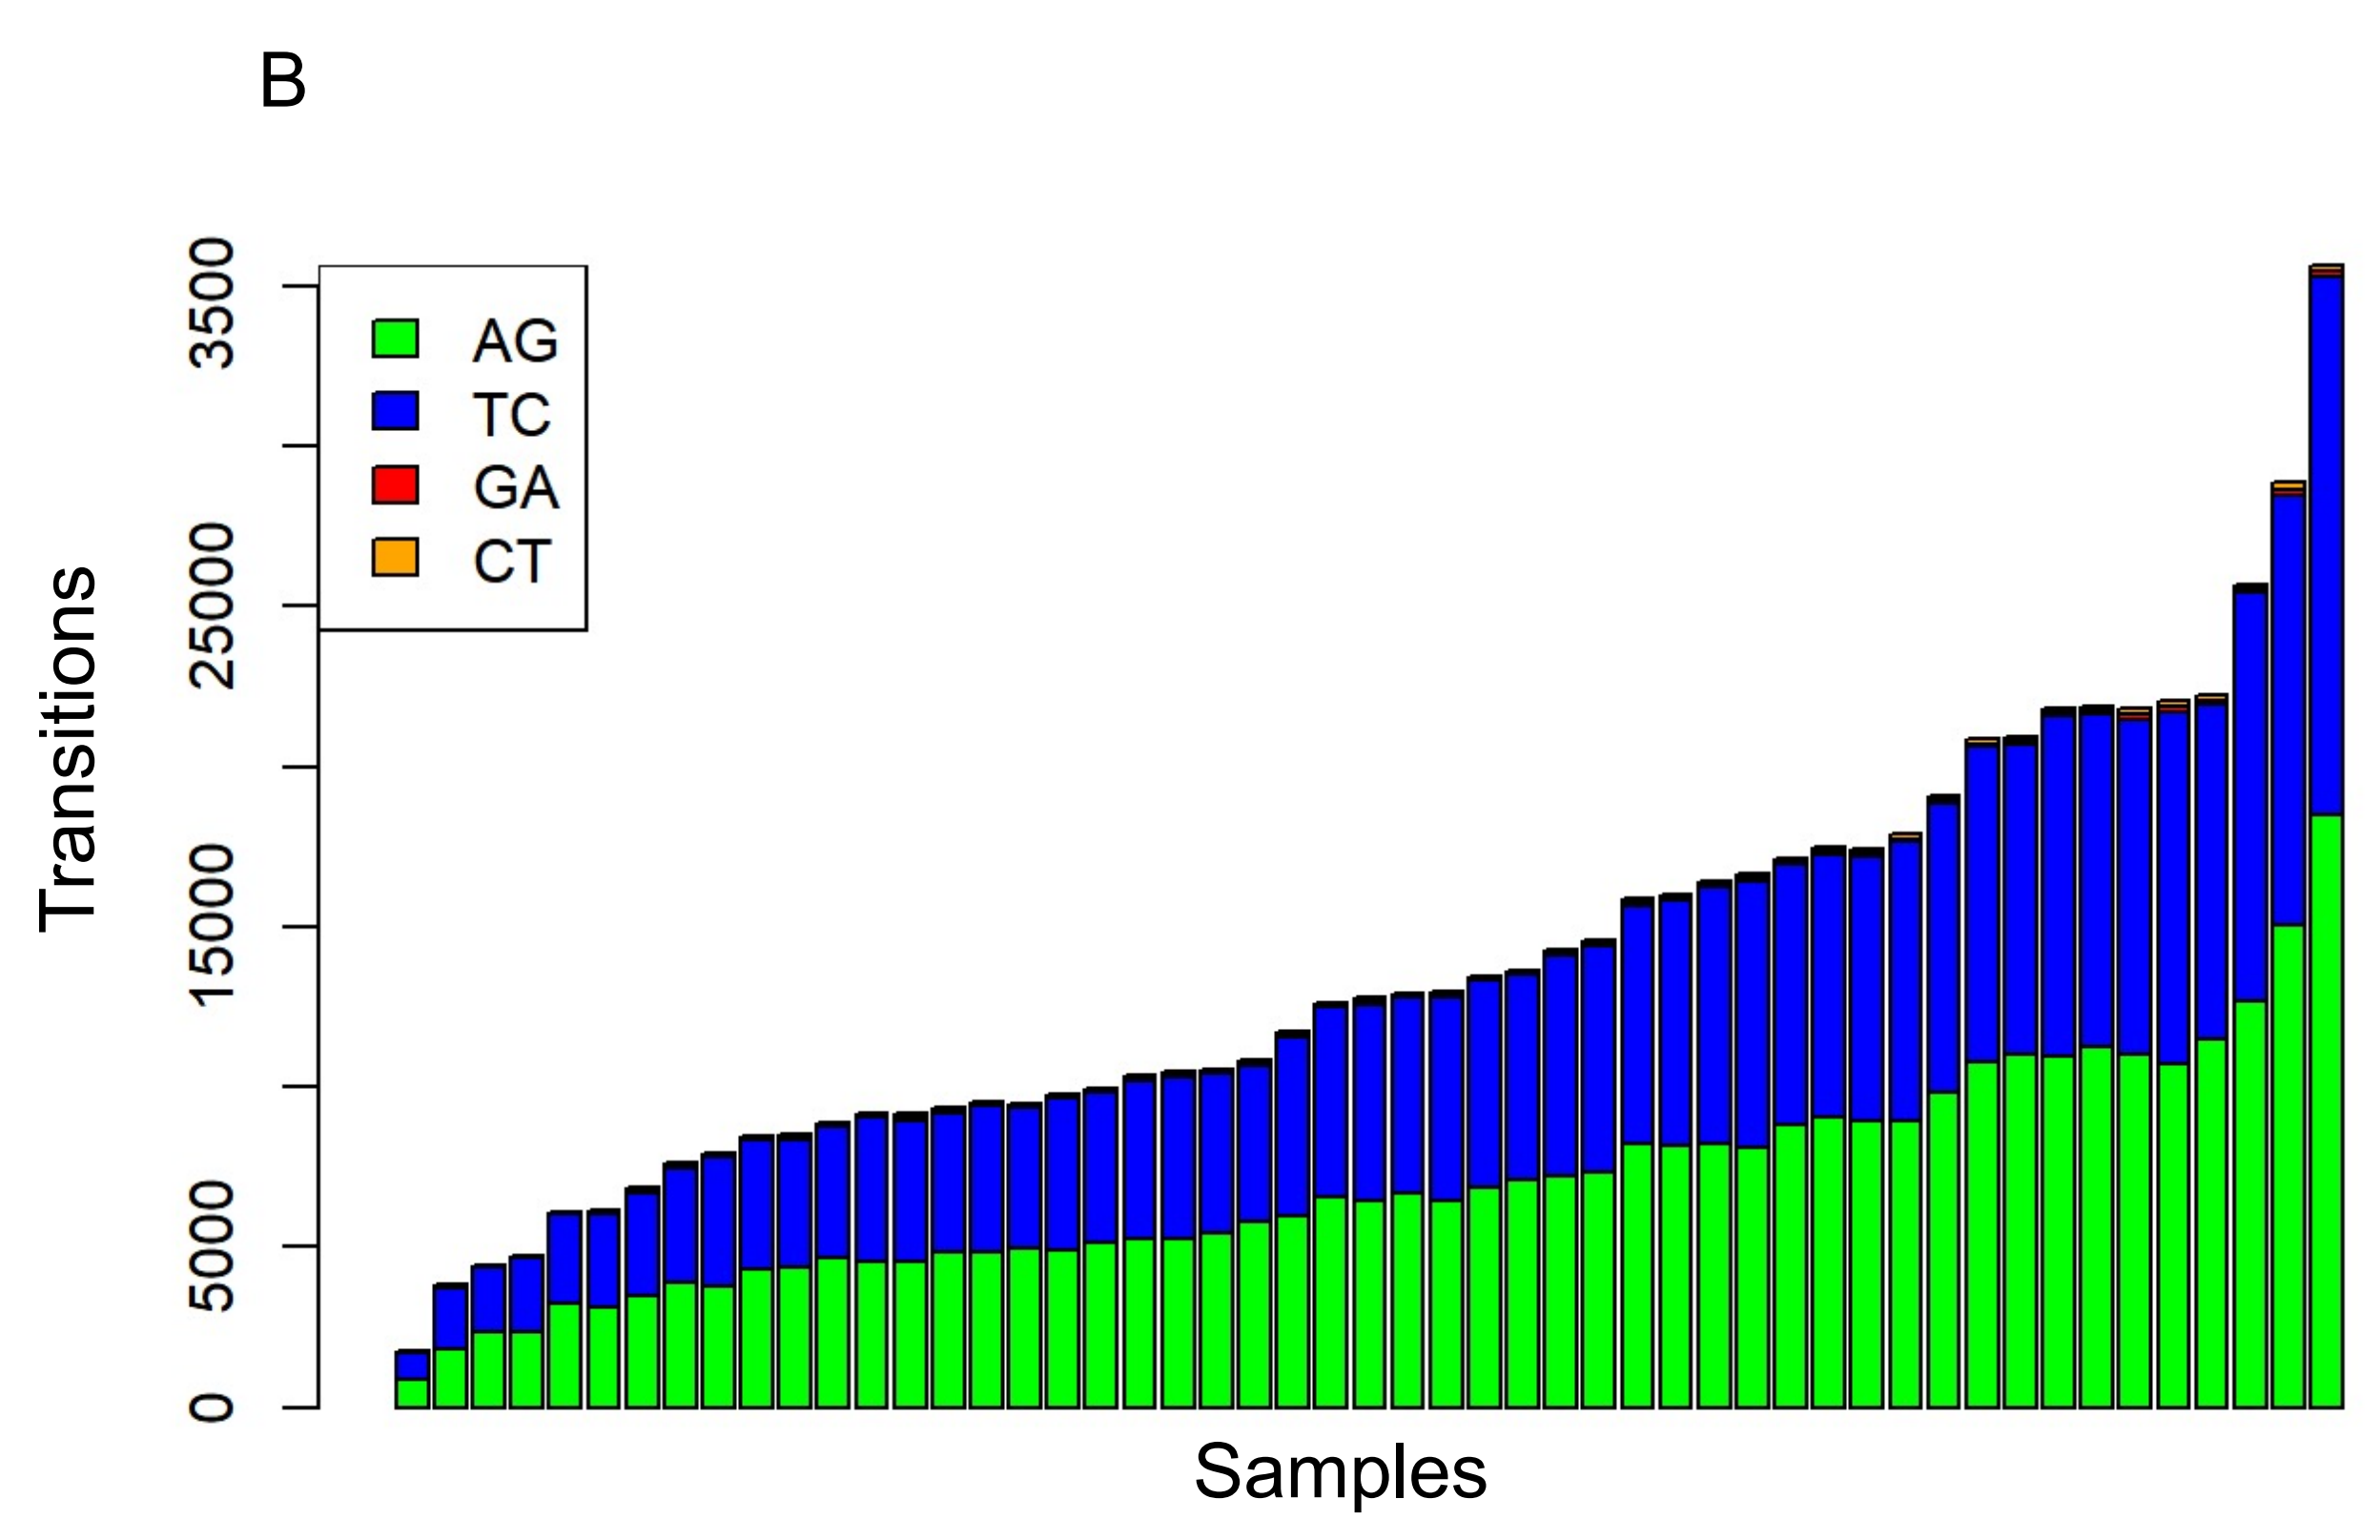

Figure S2

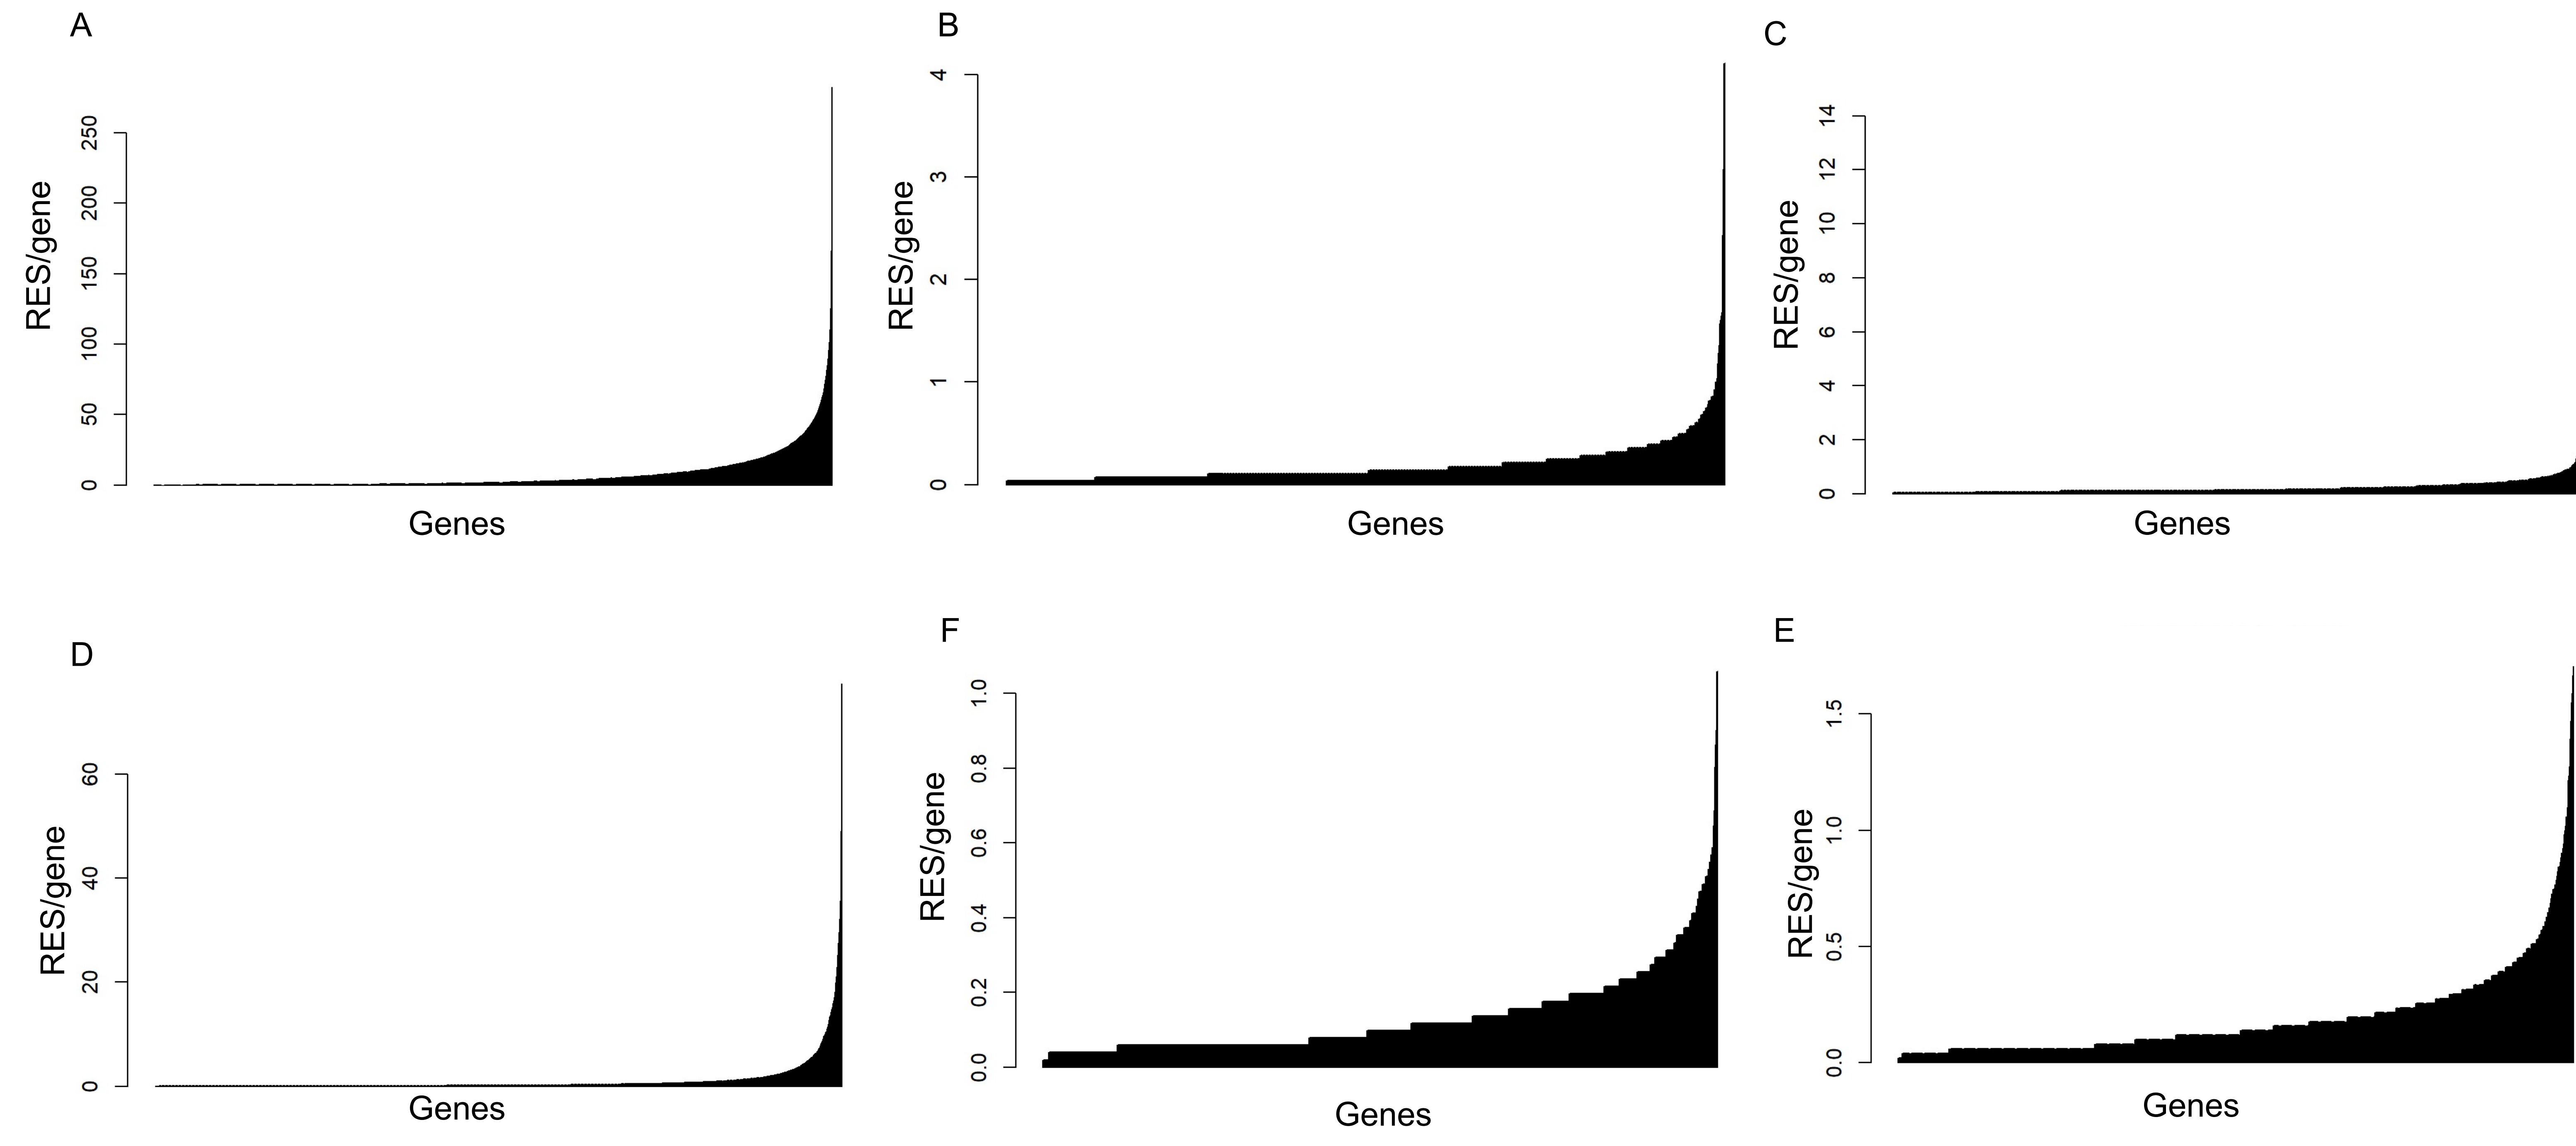

Figure S3

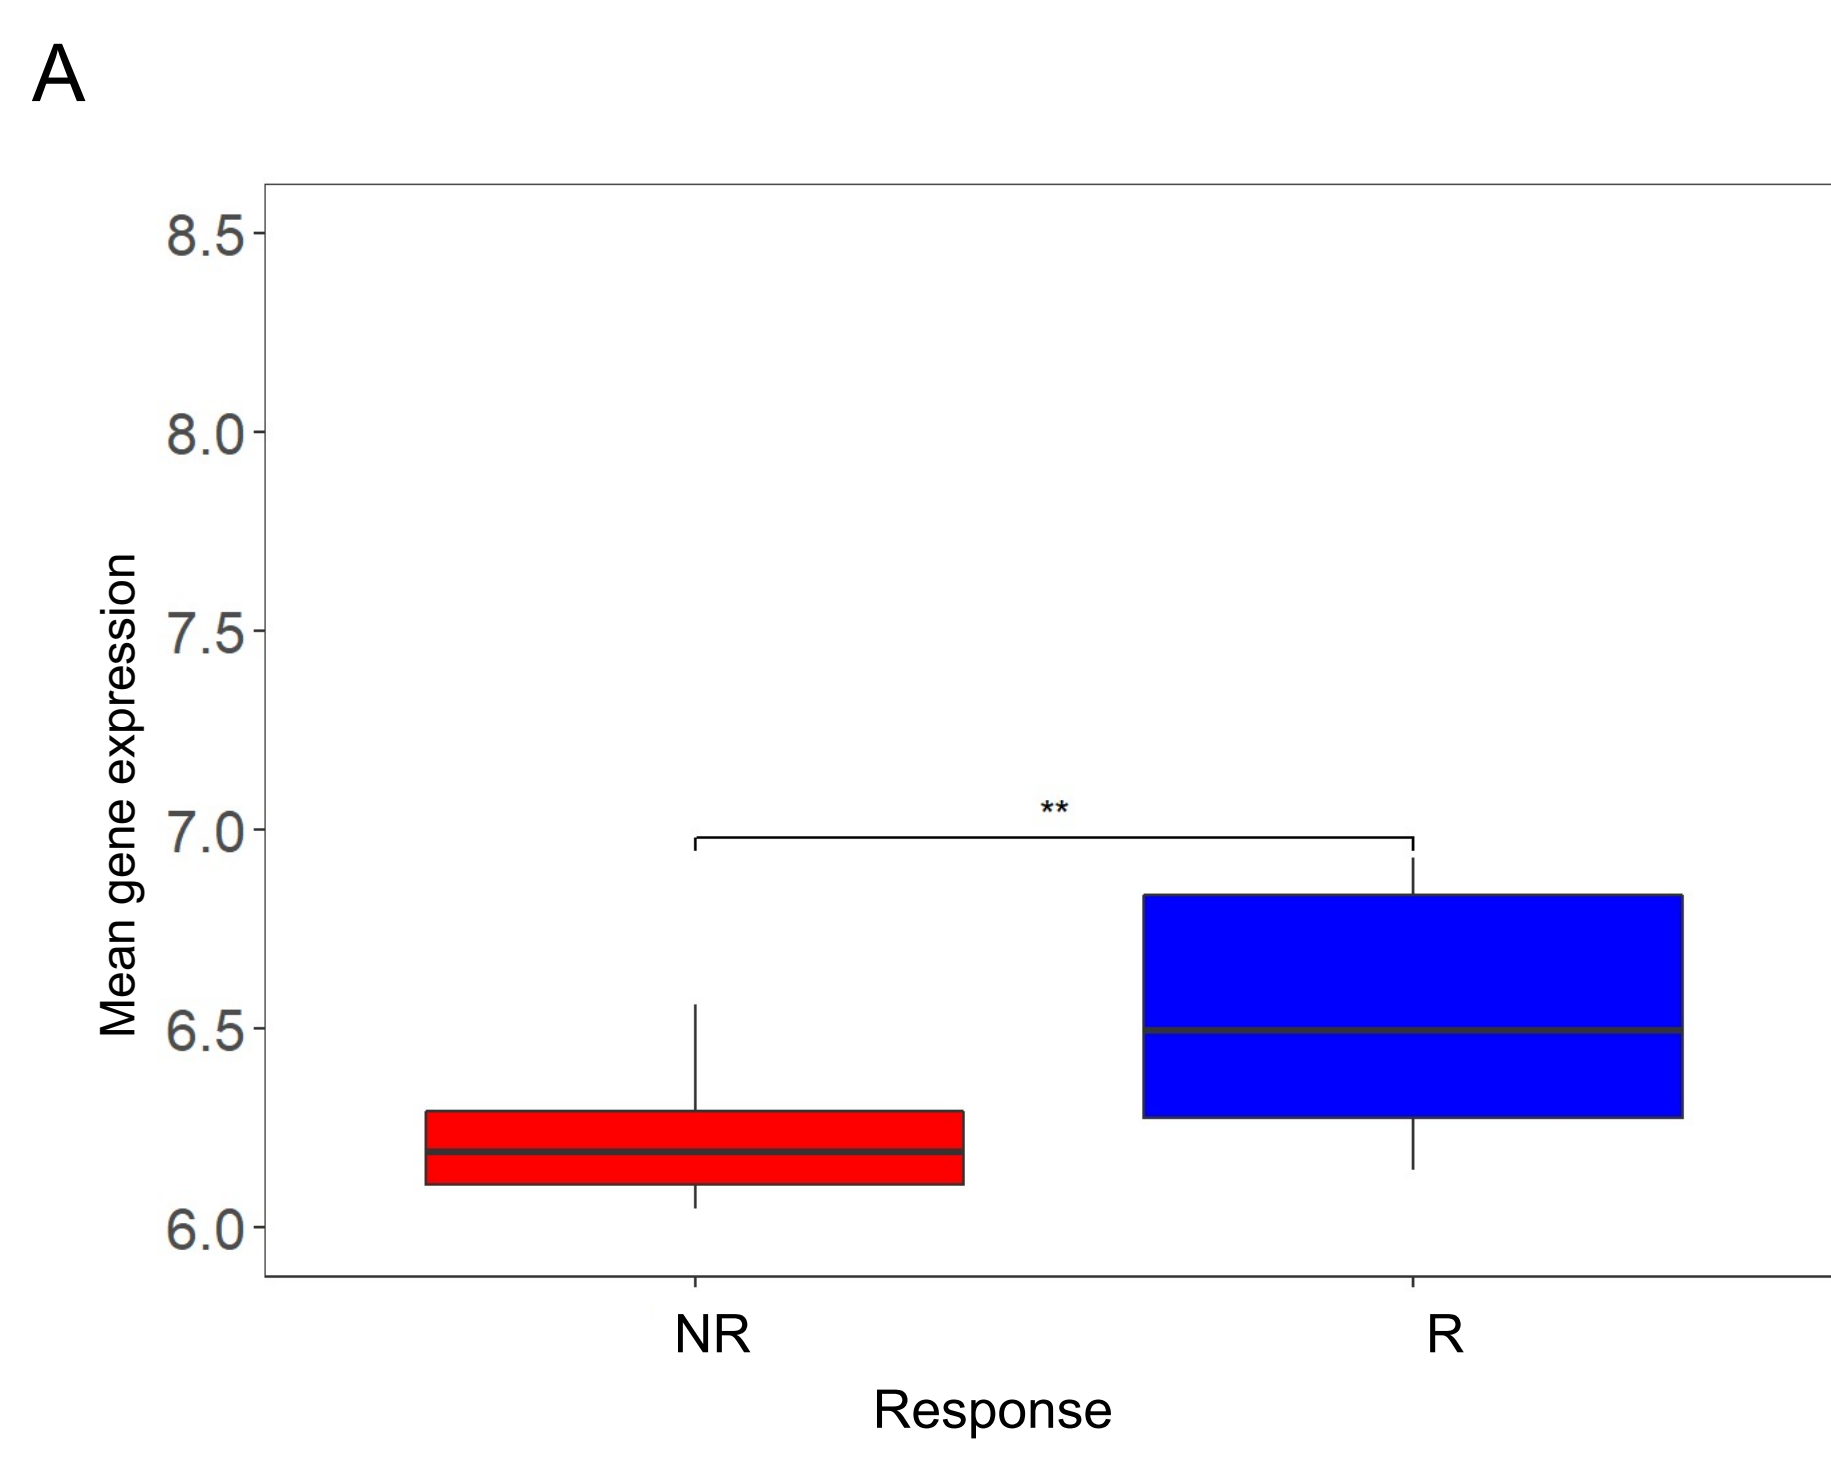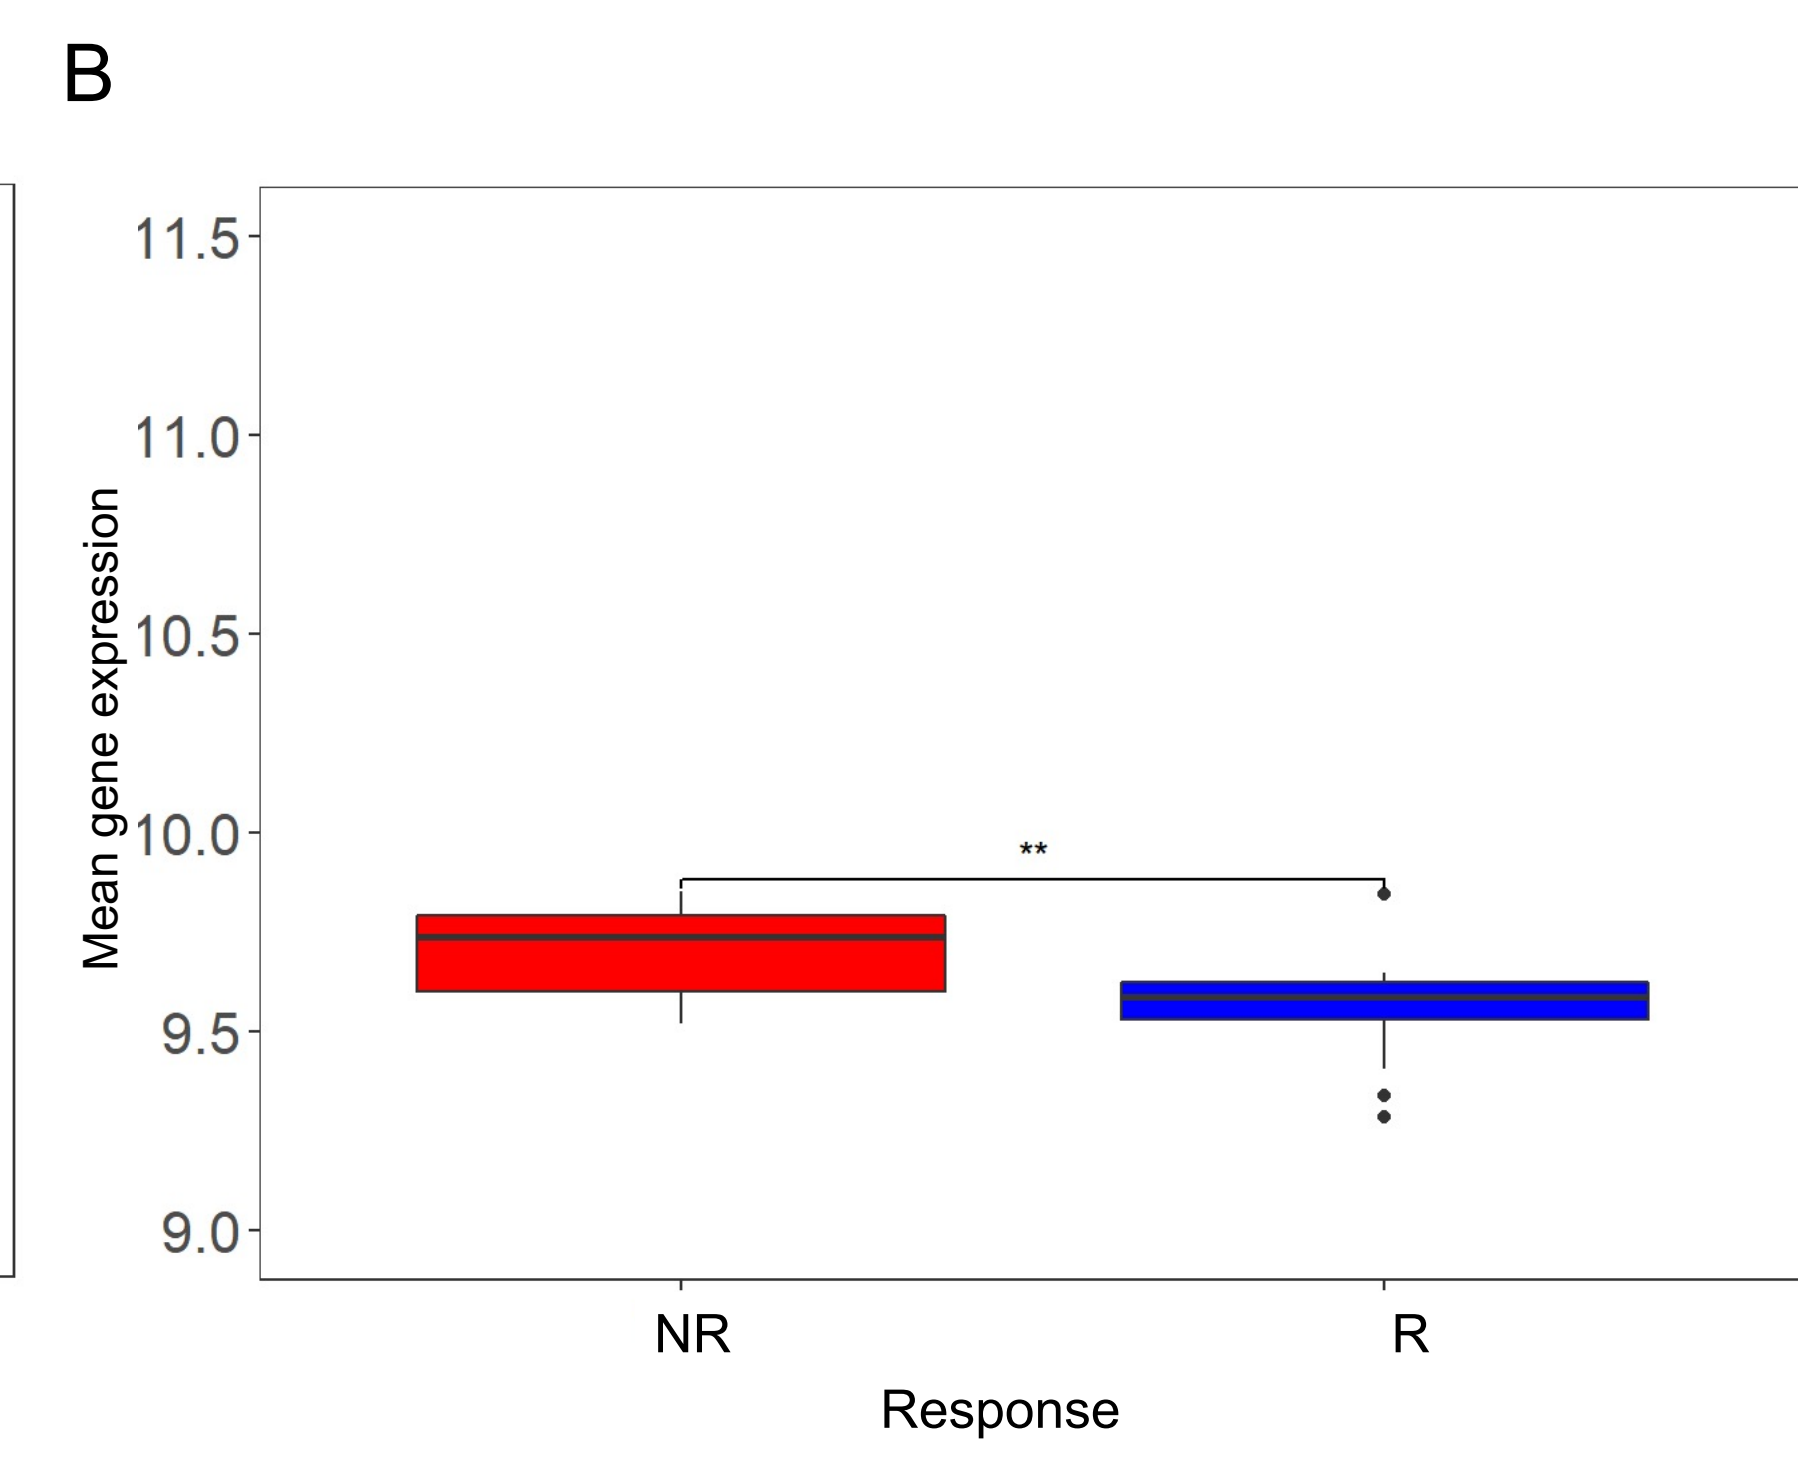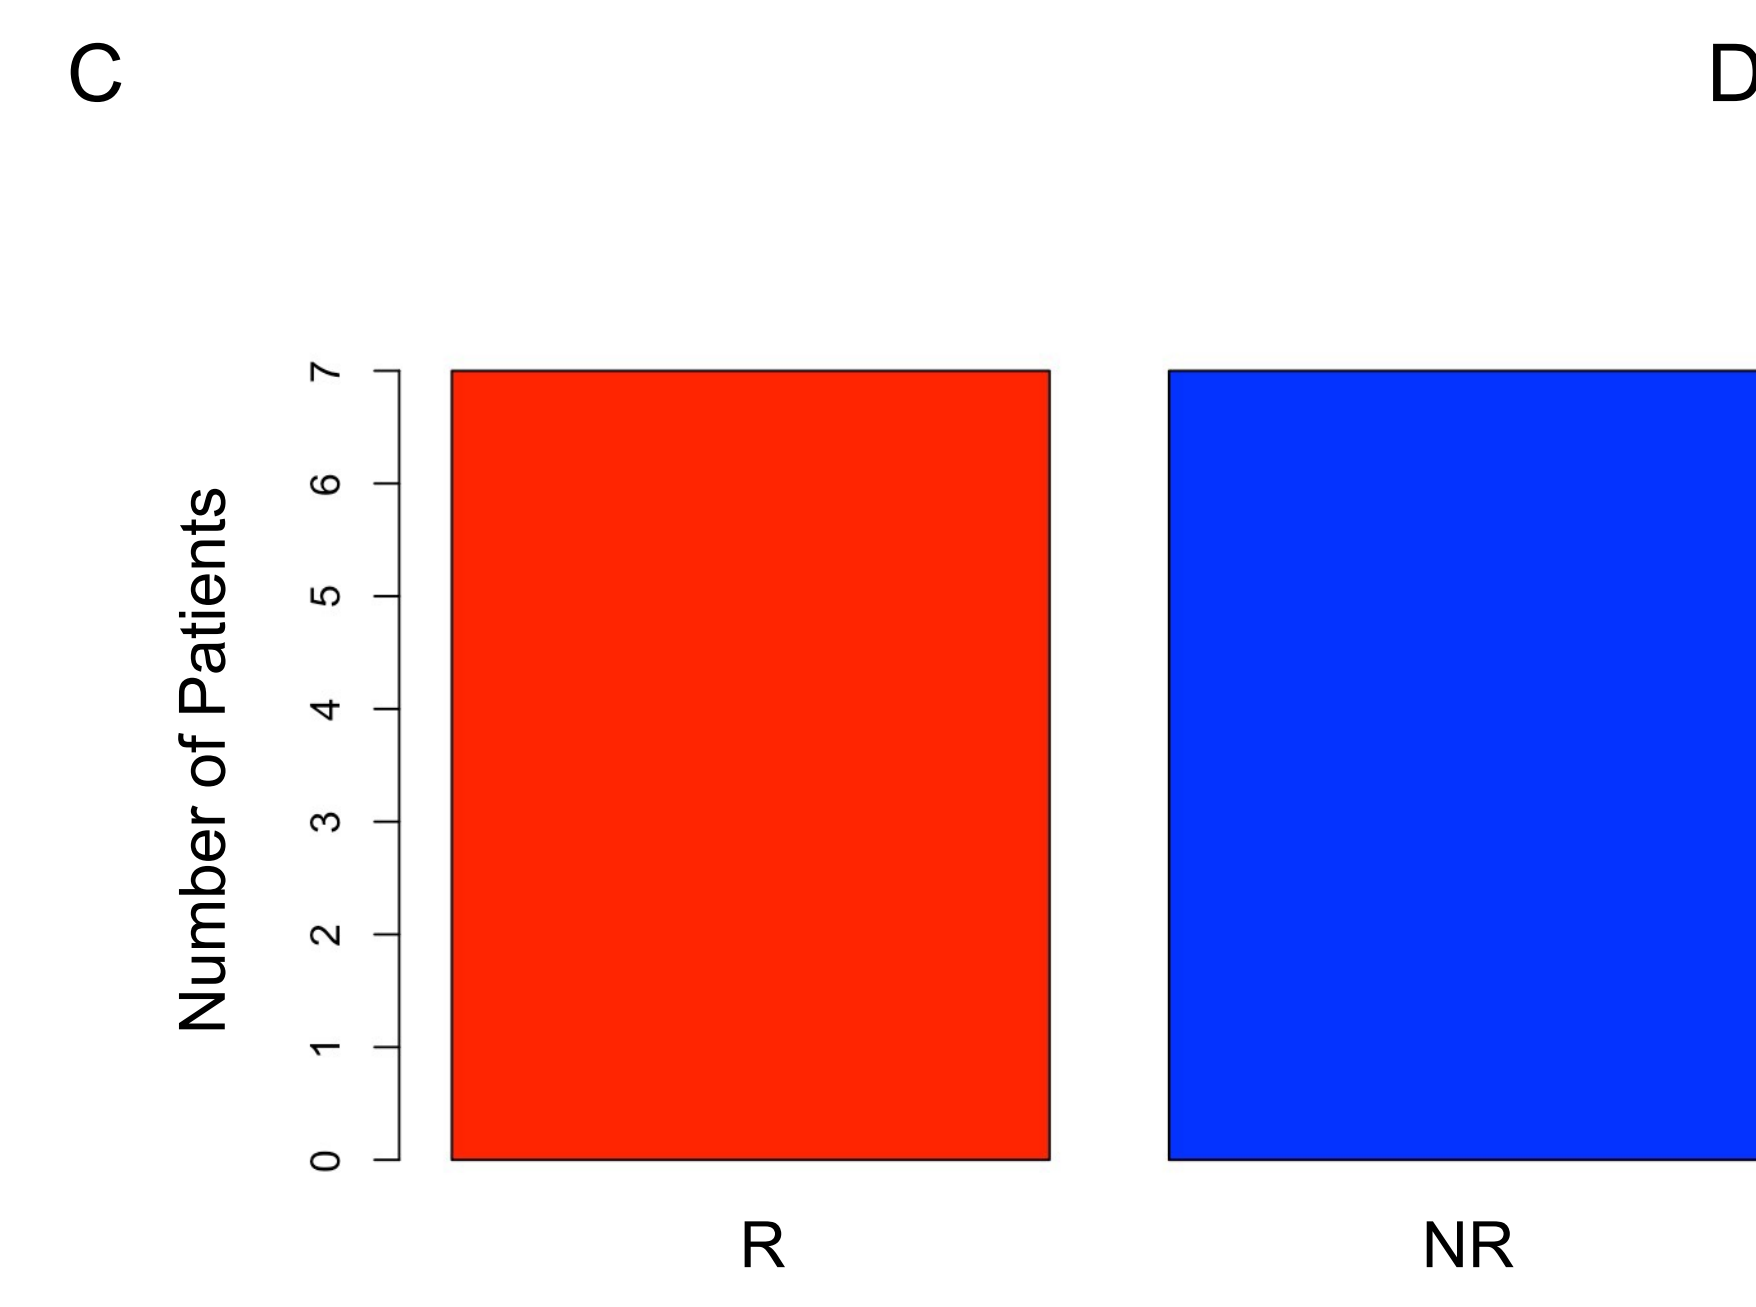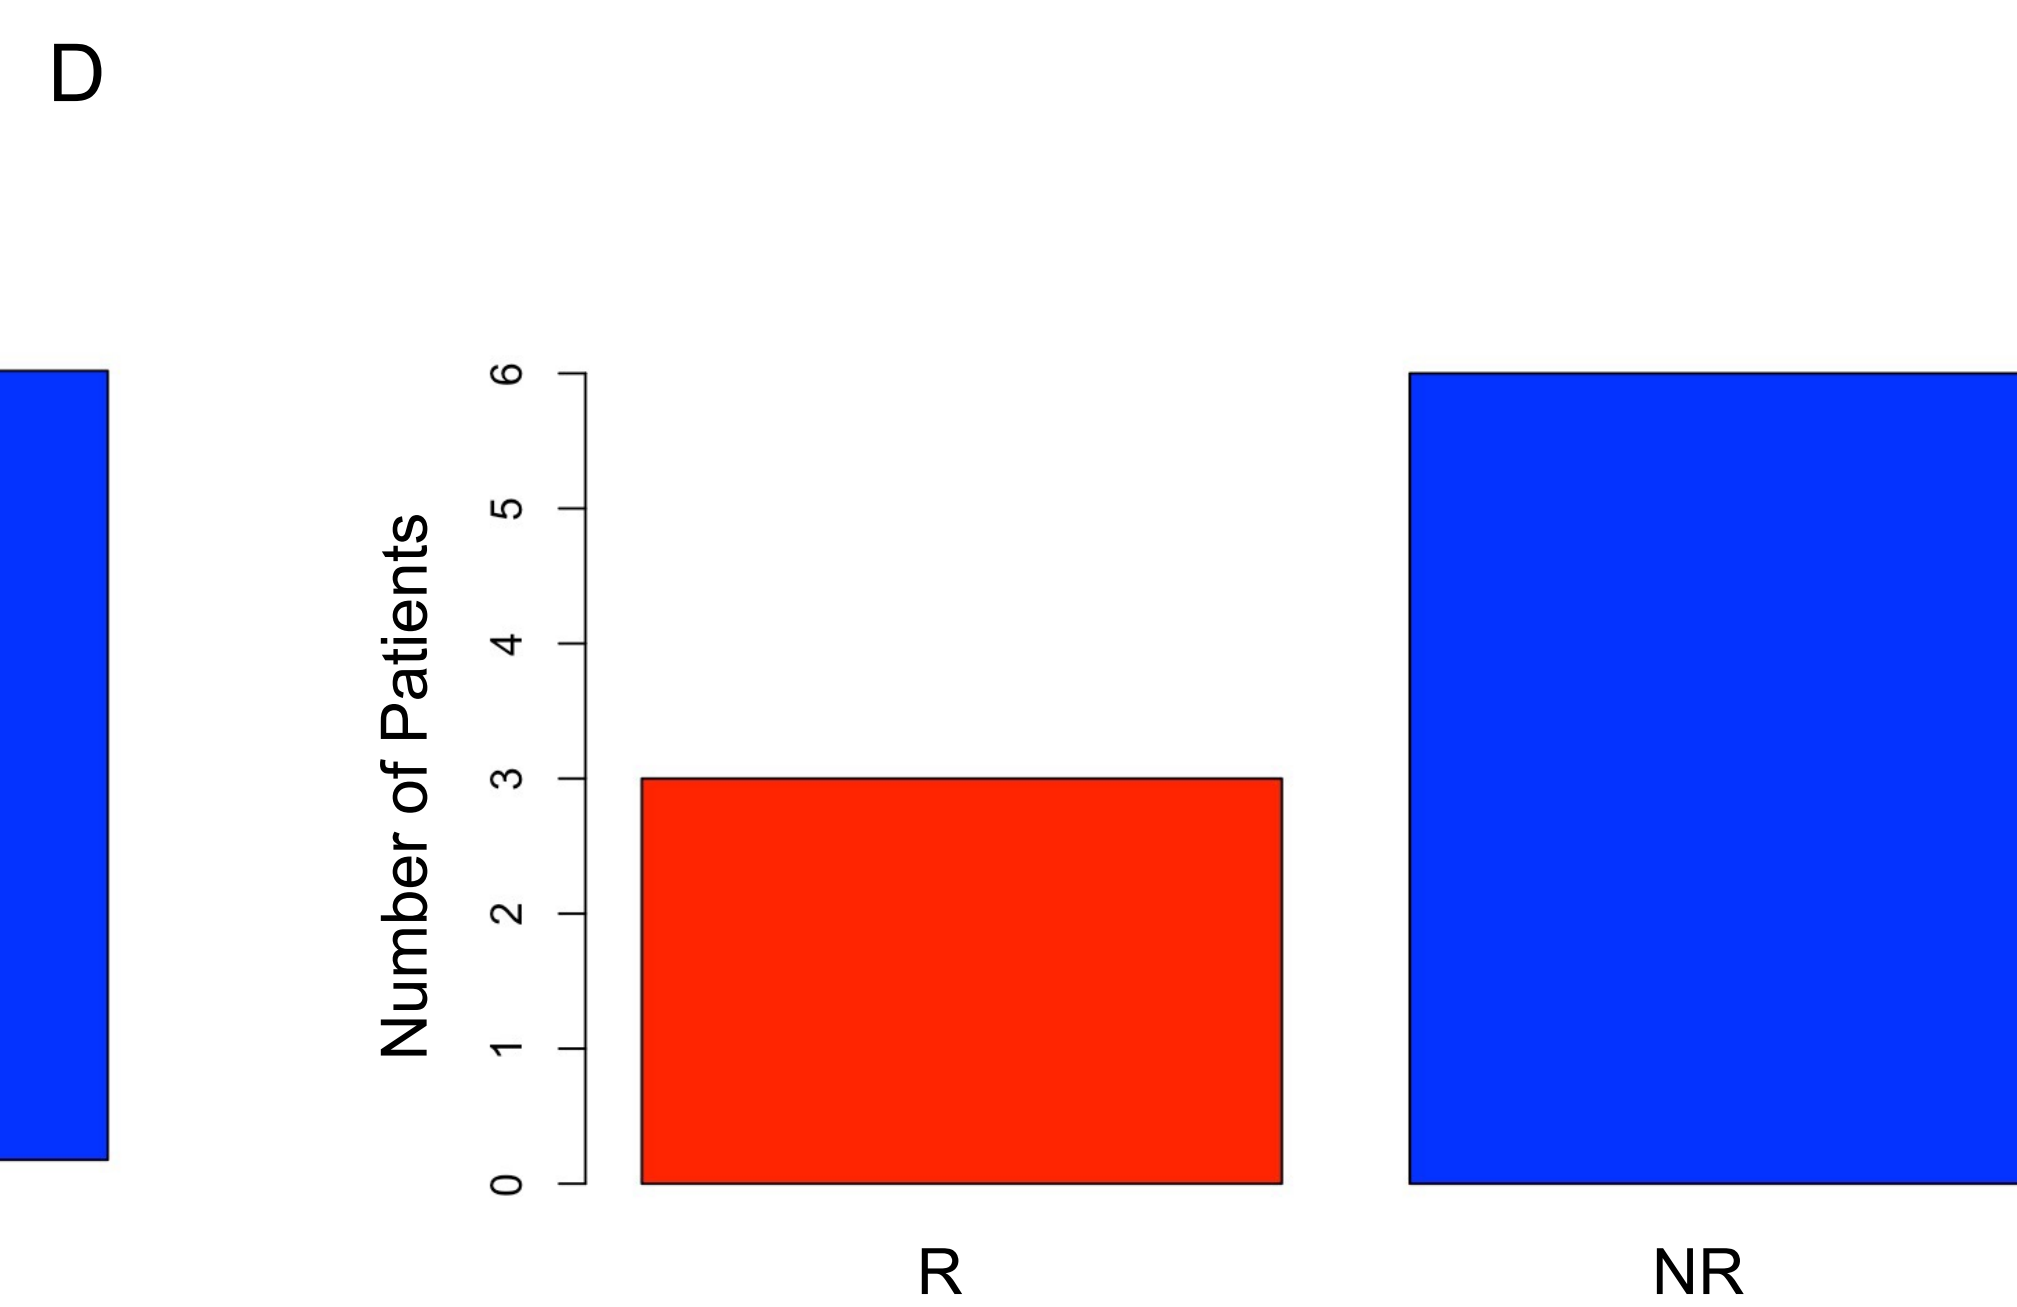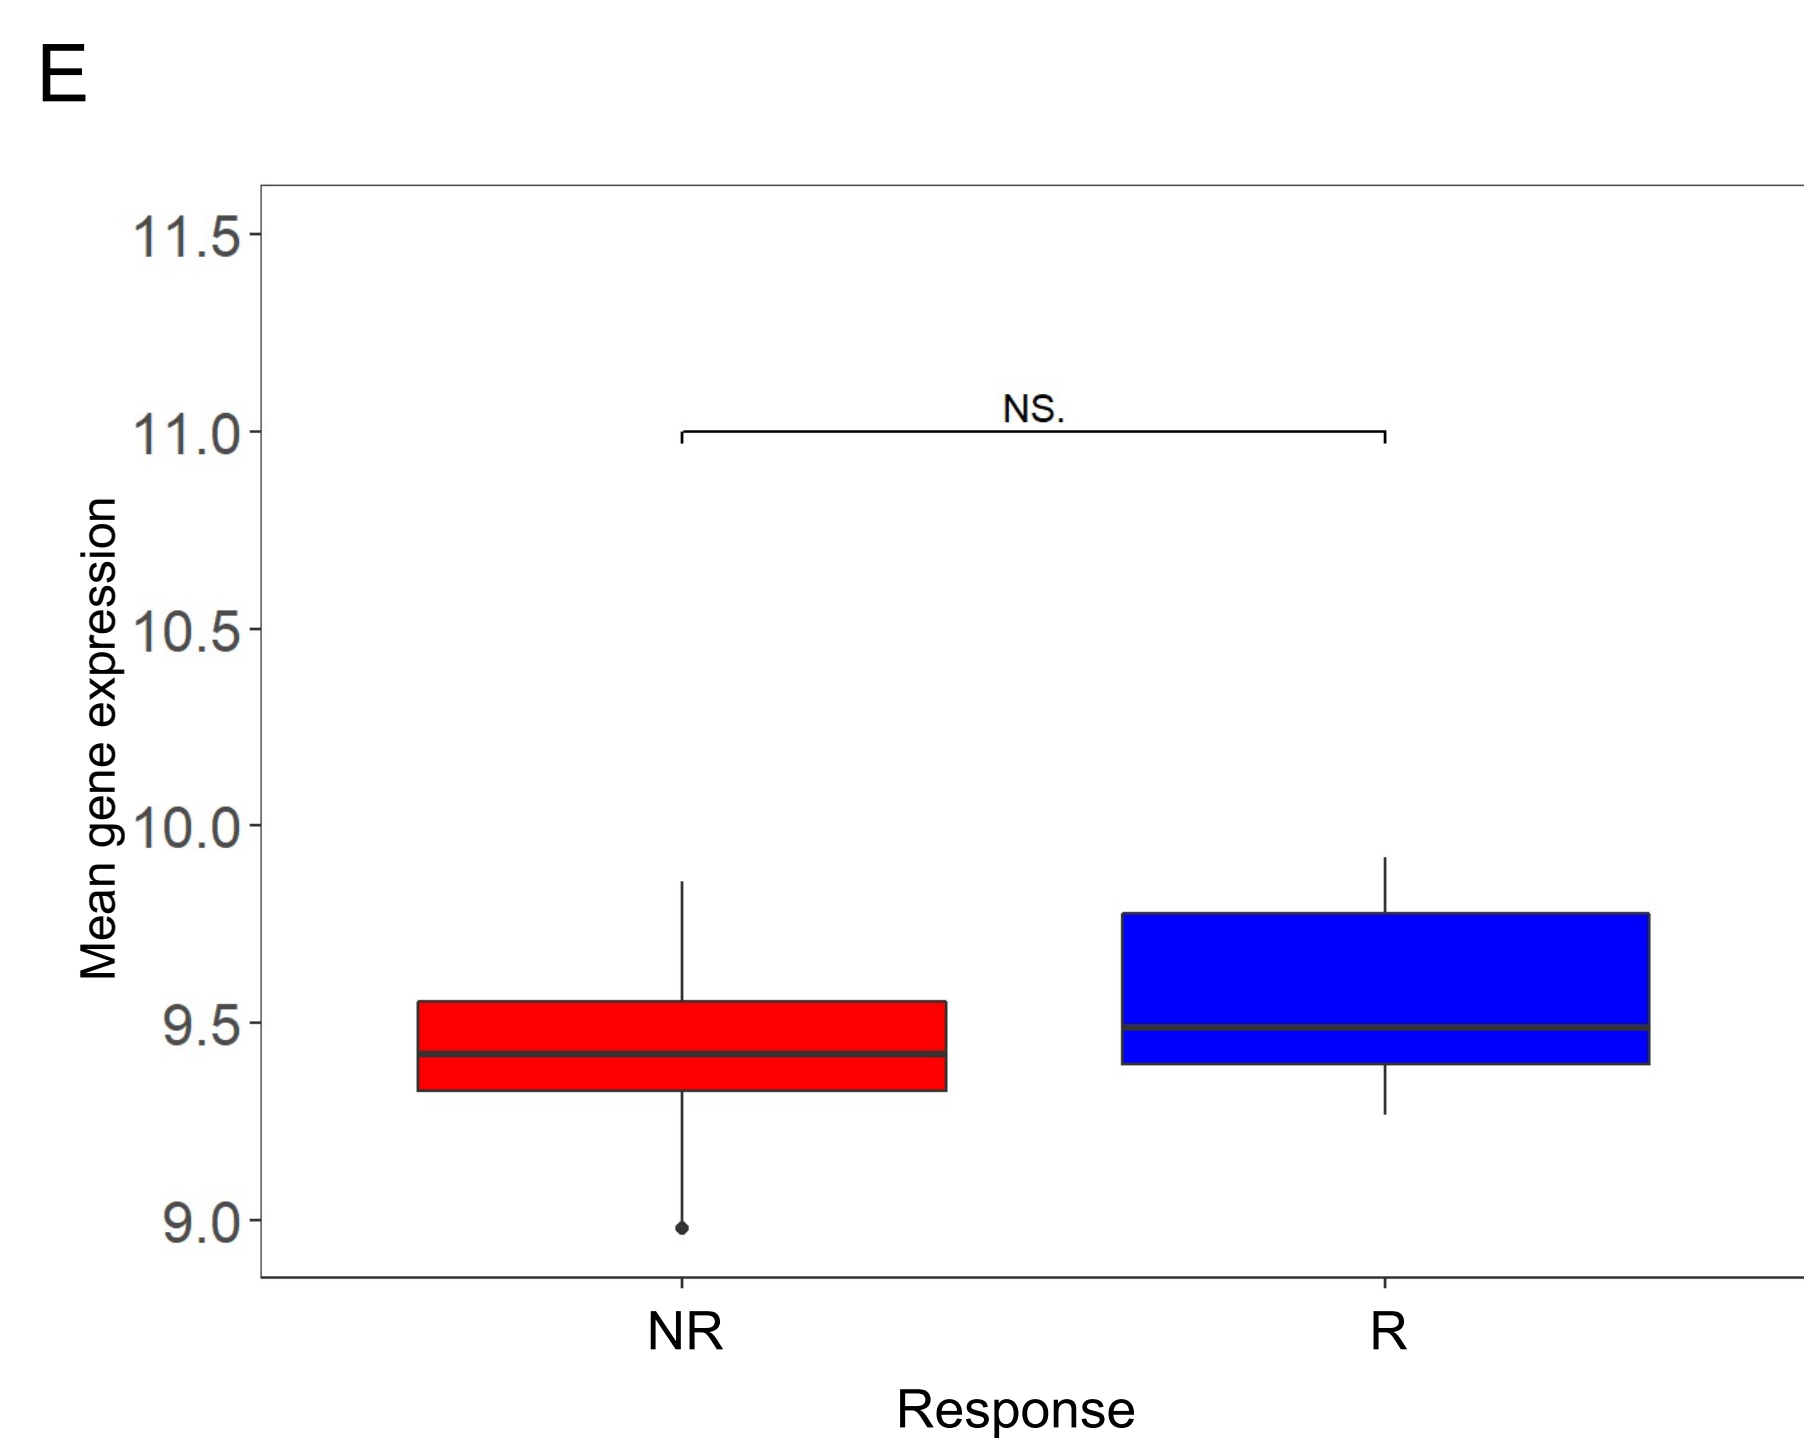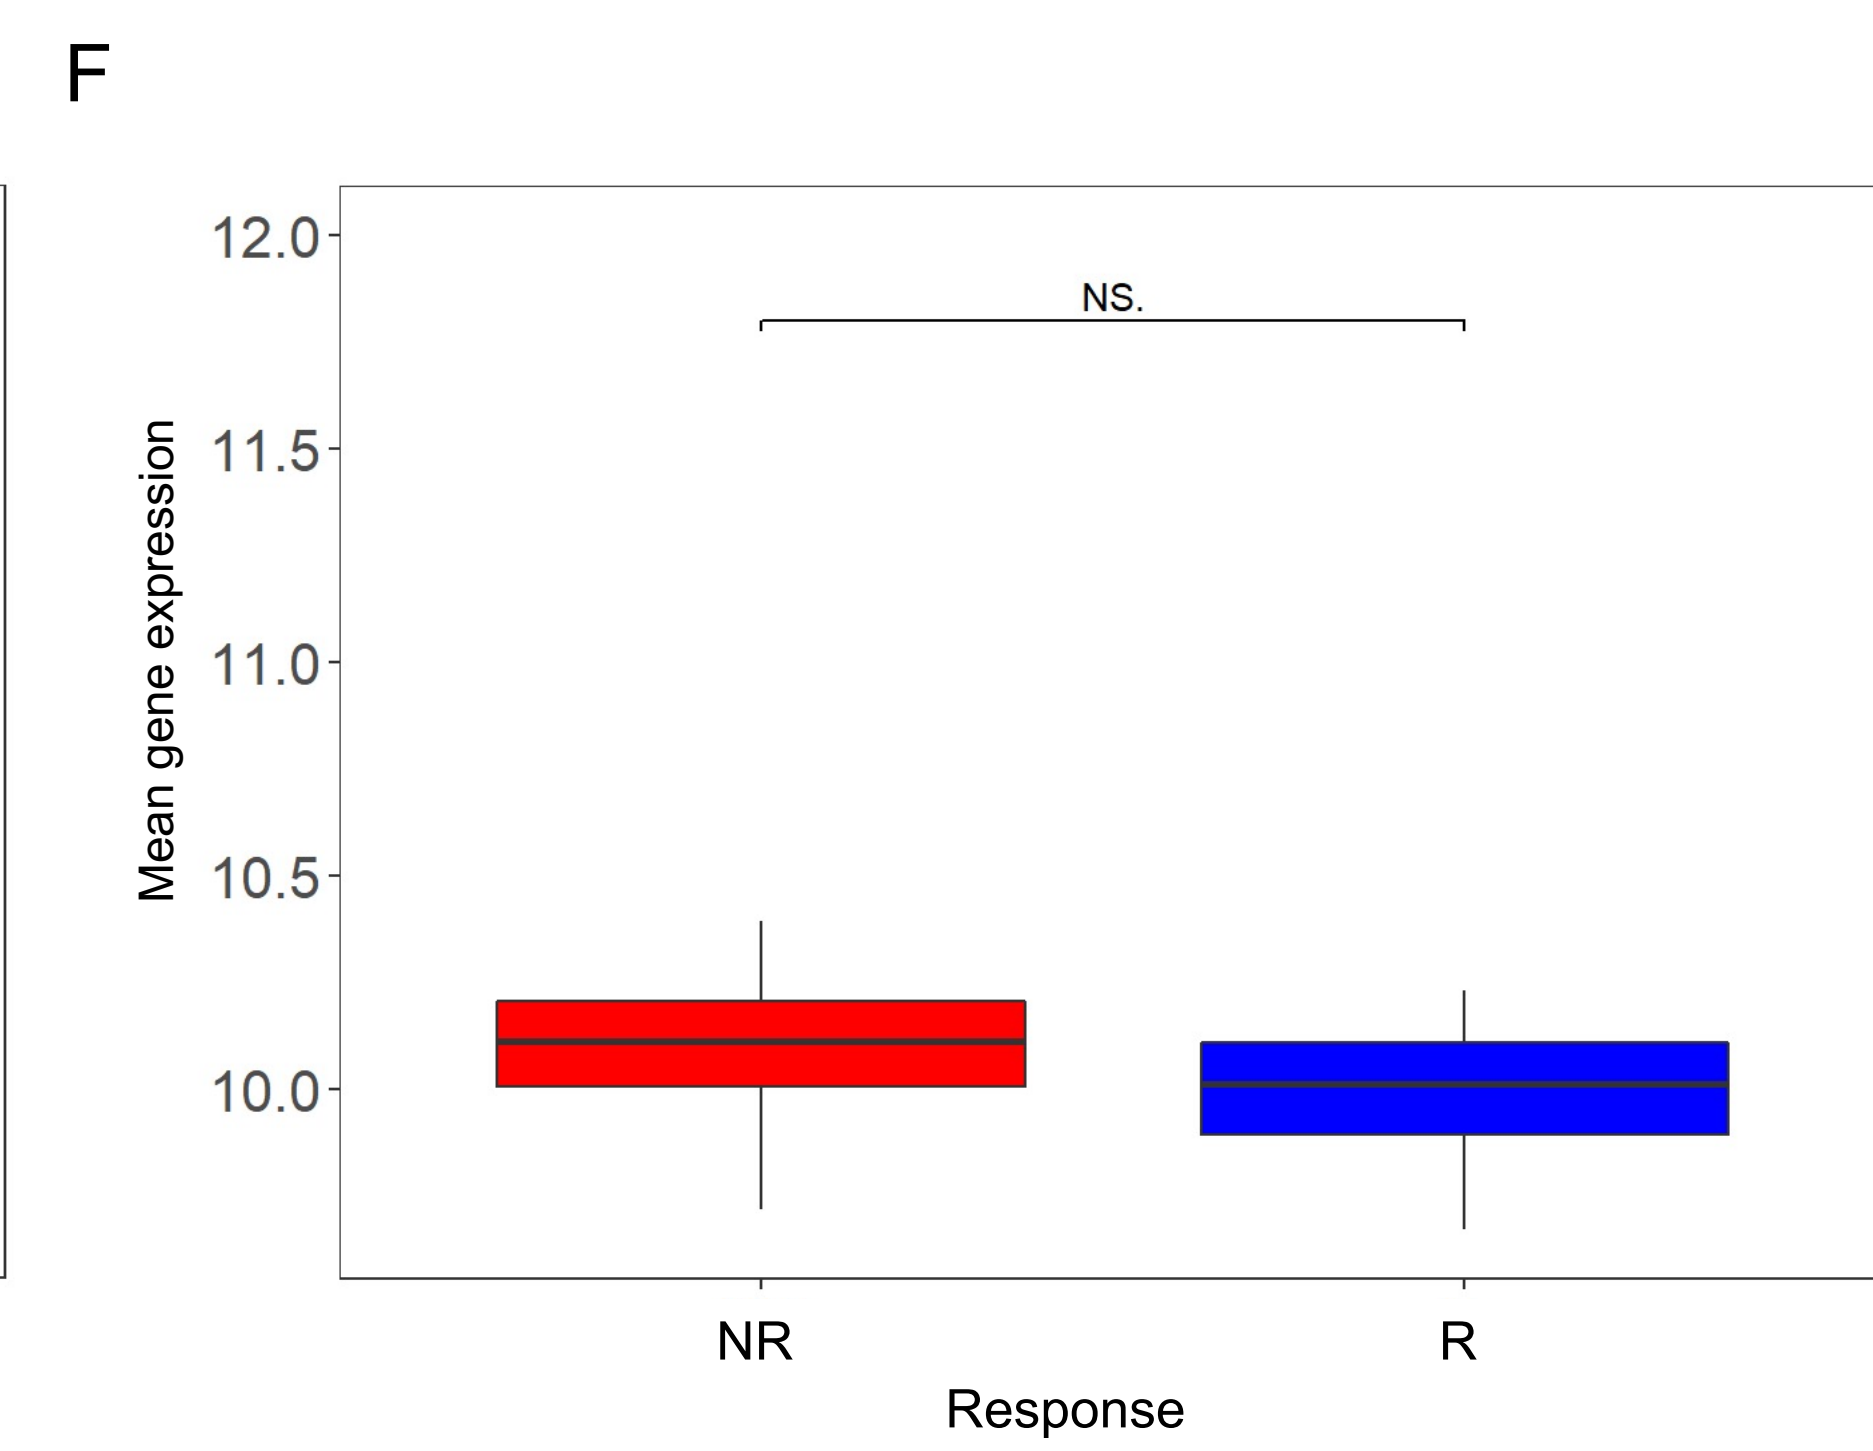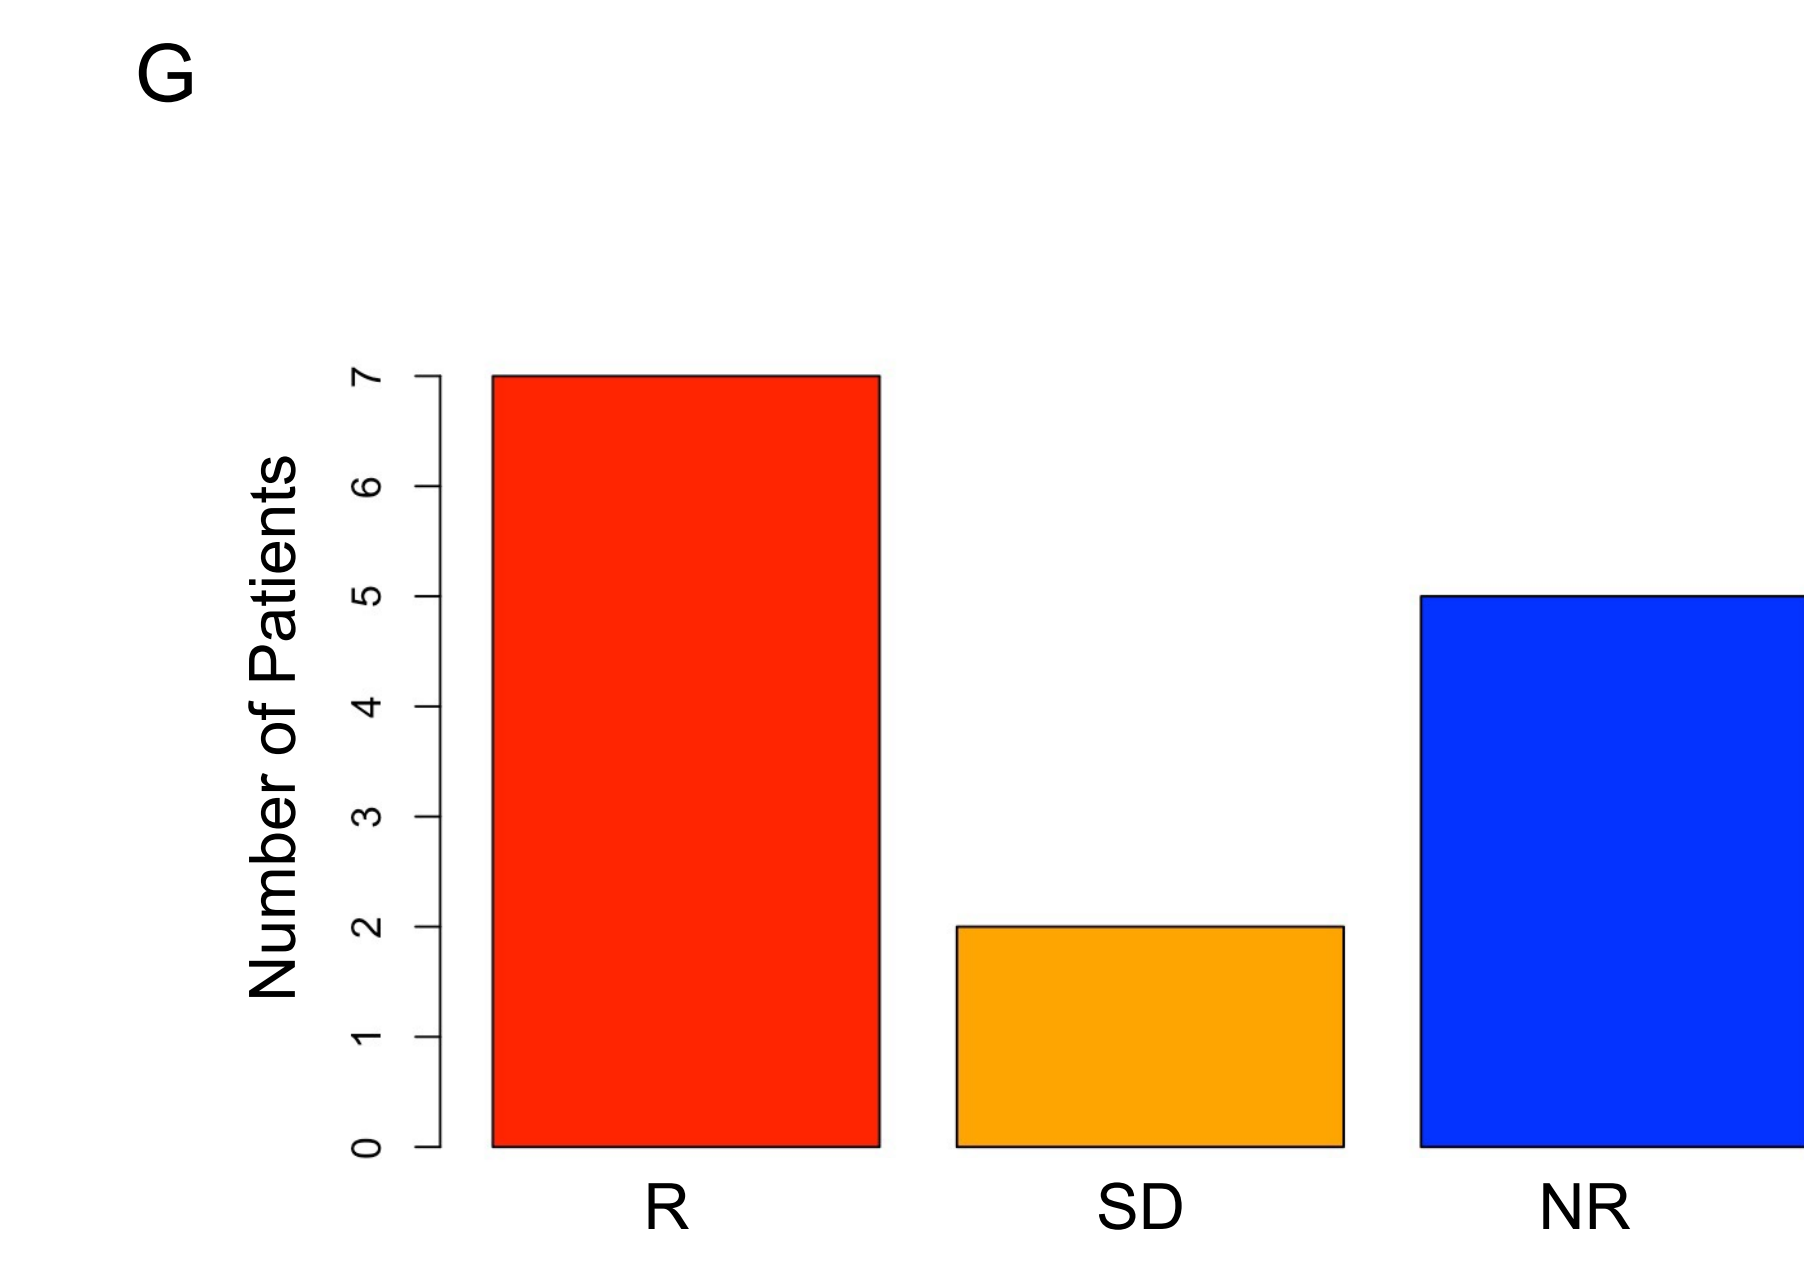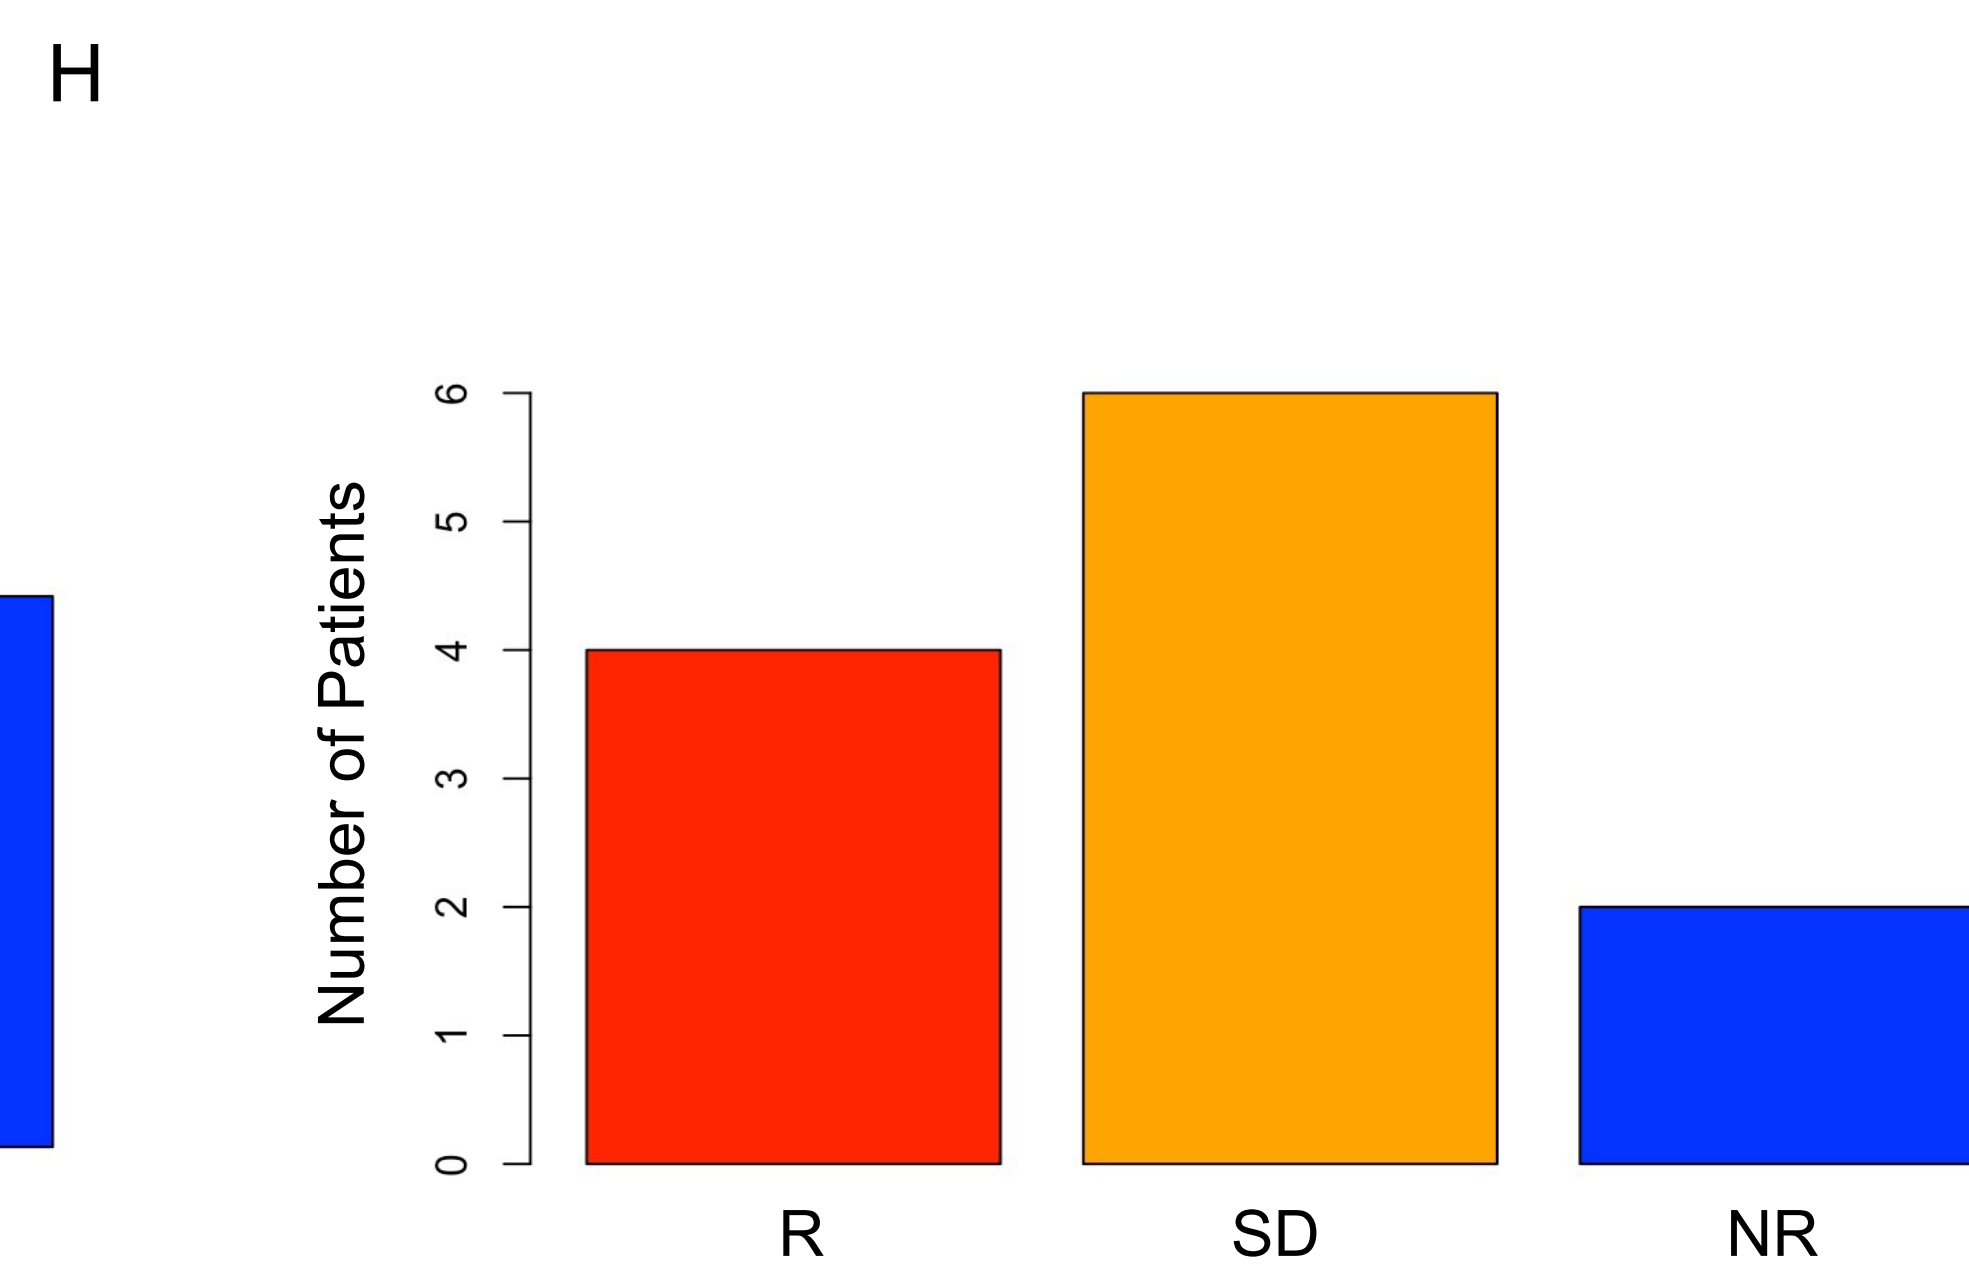

Figure S4

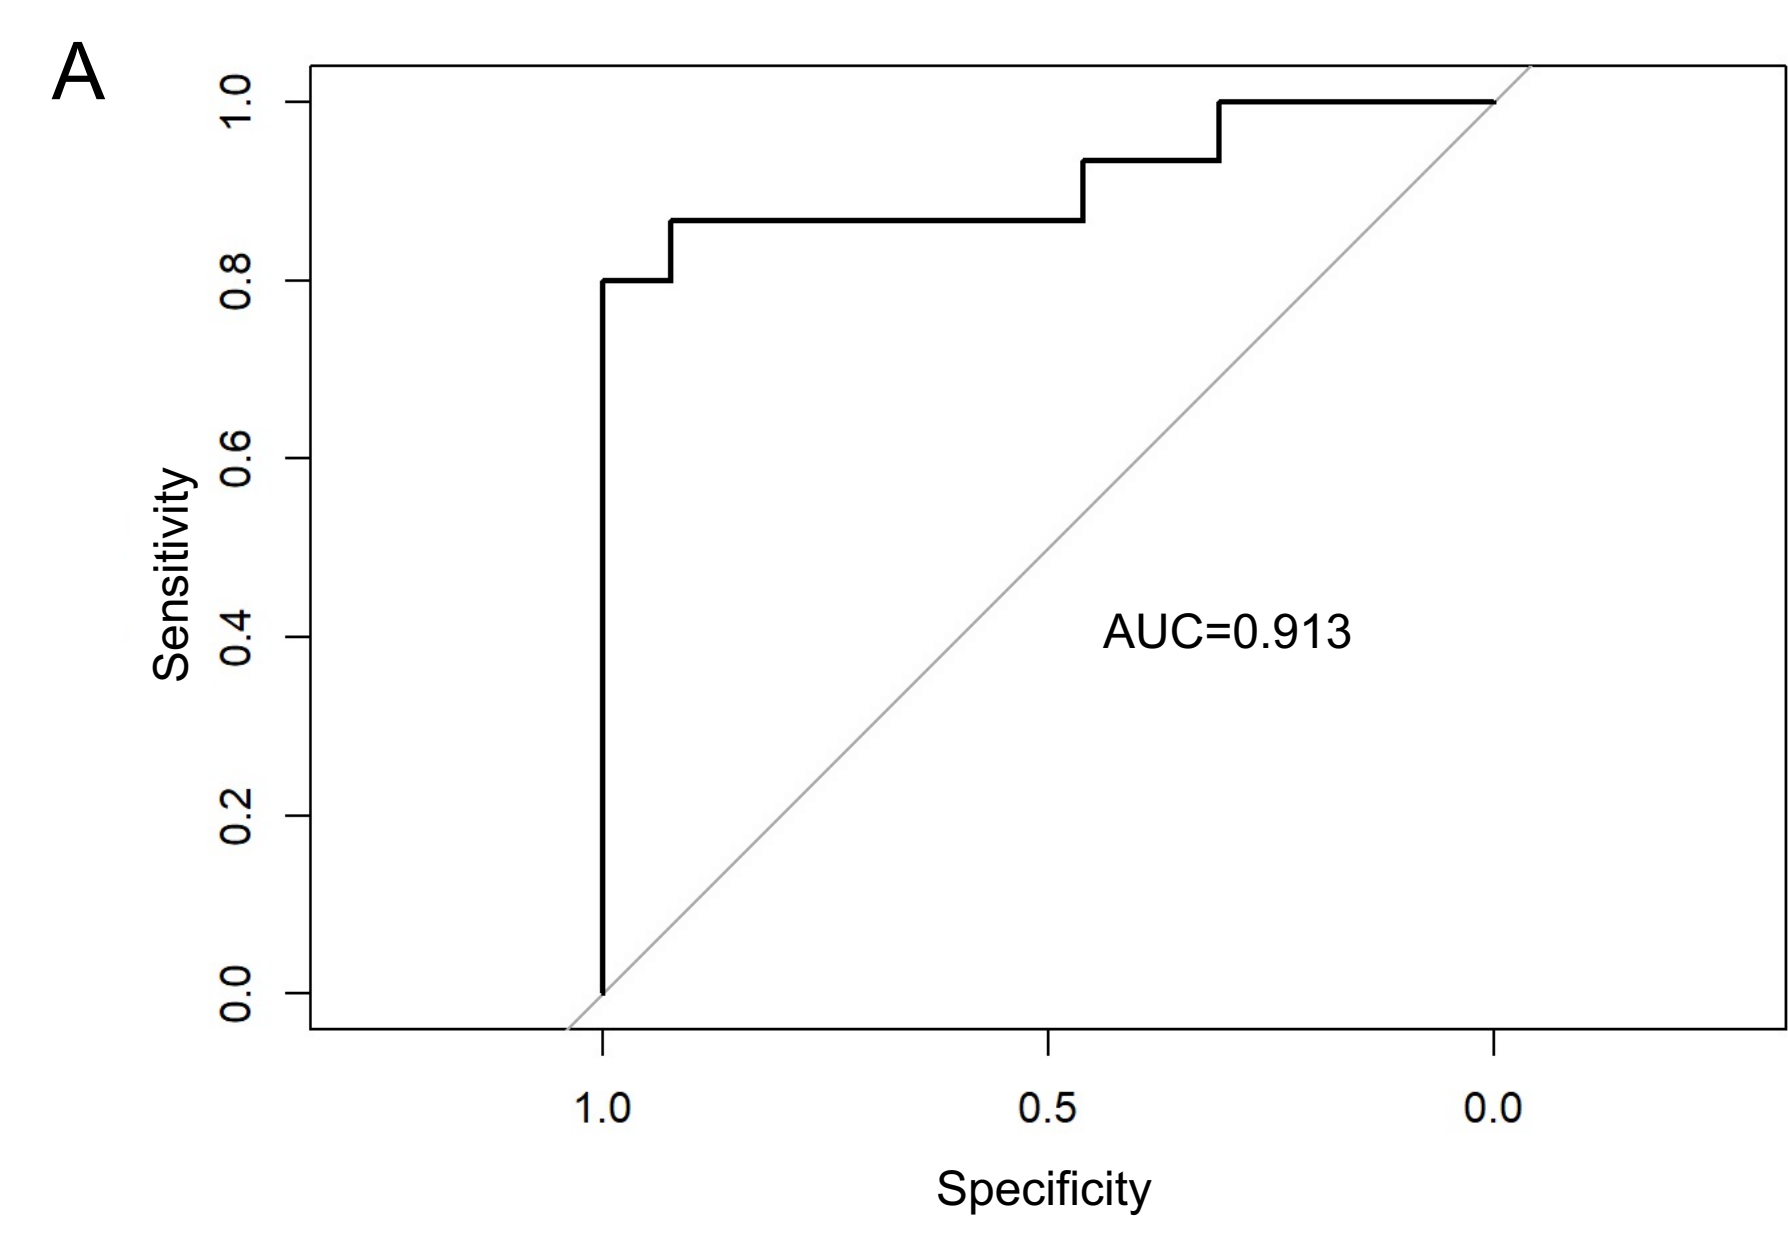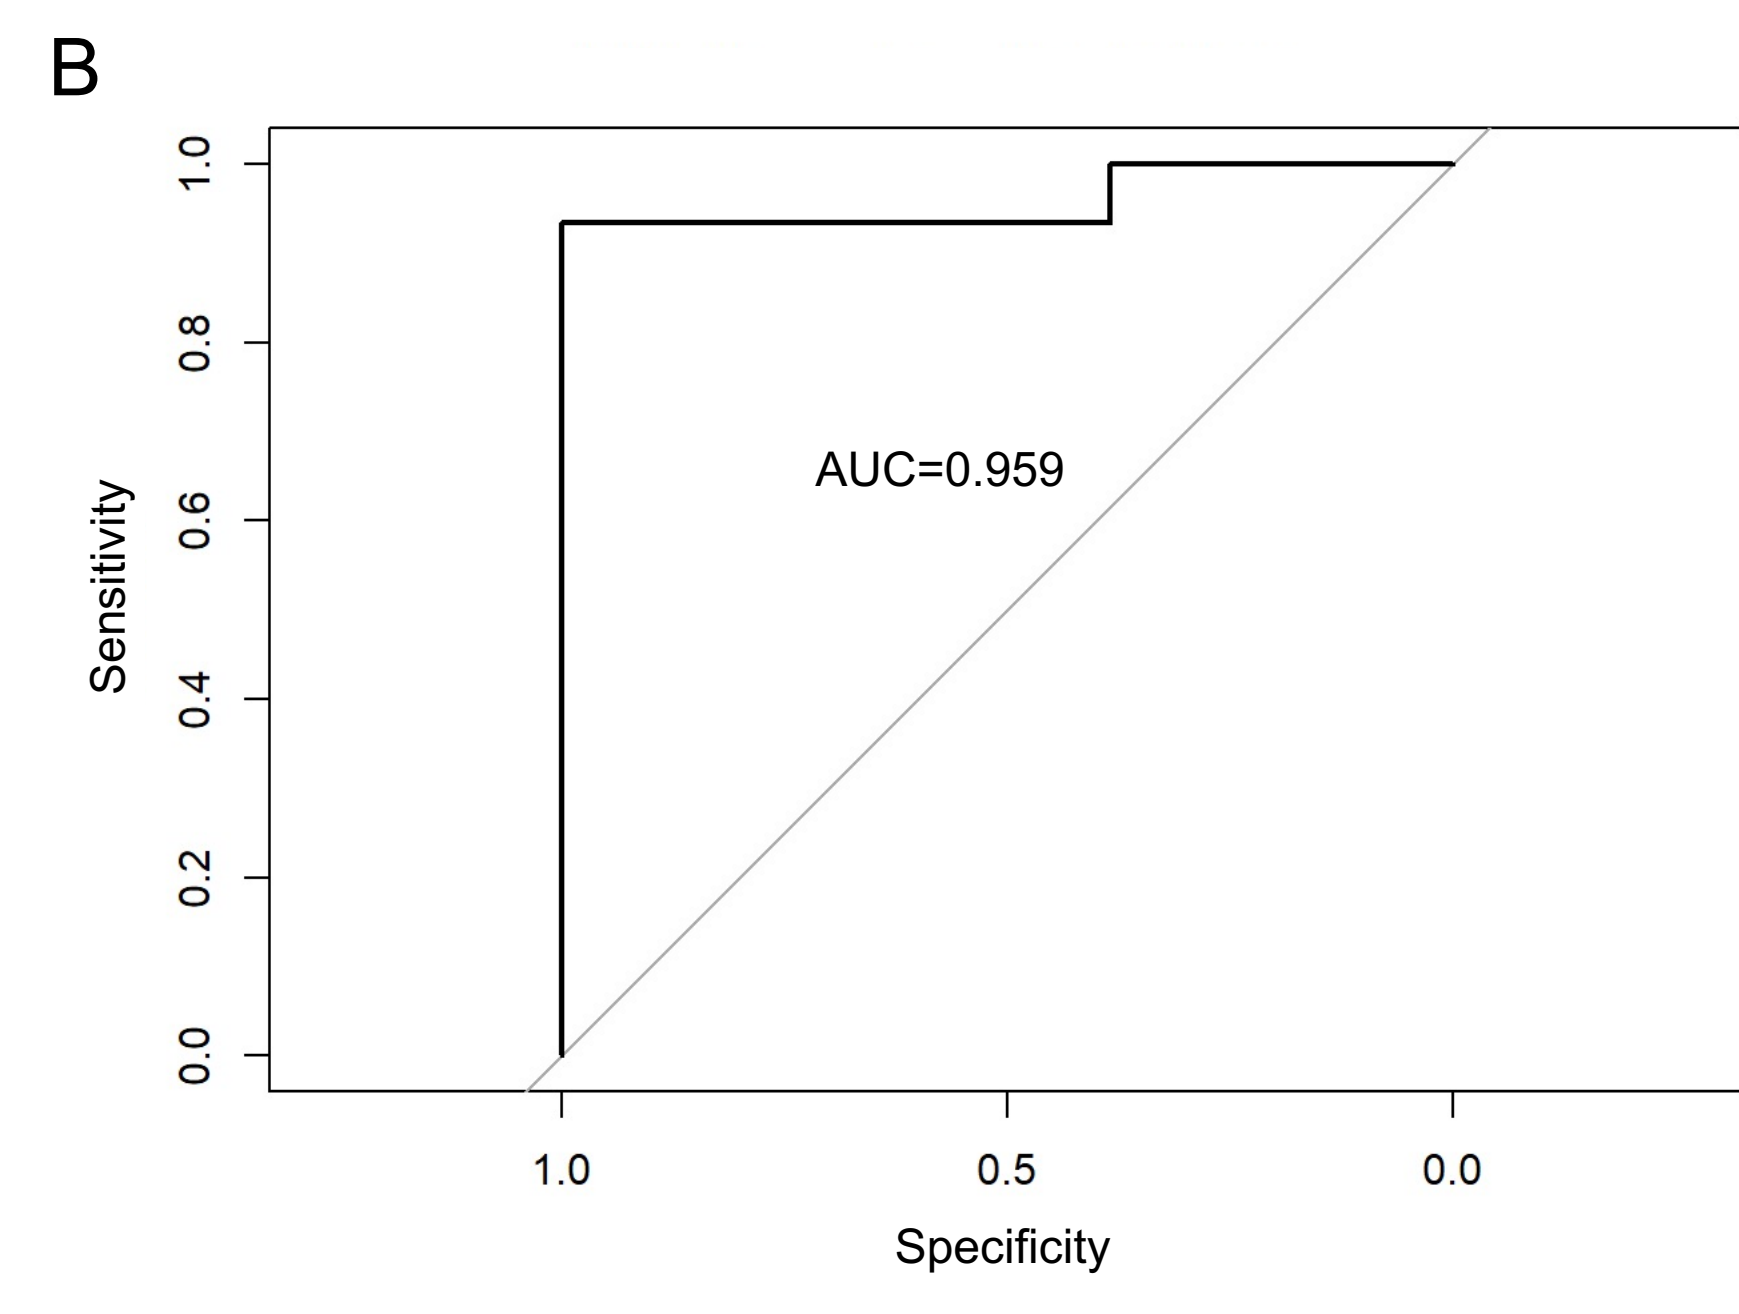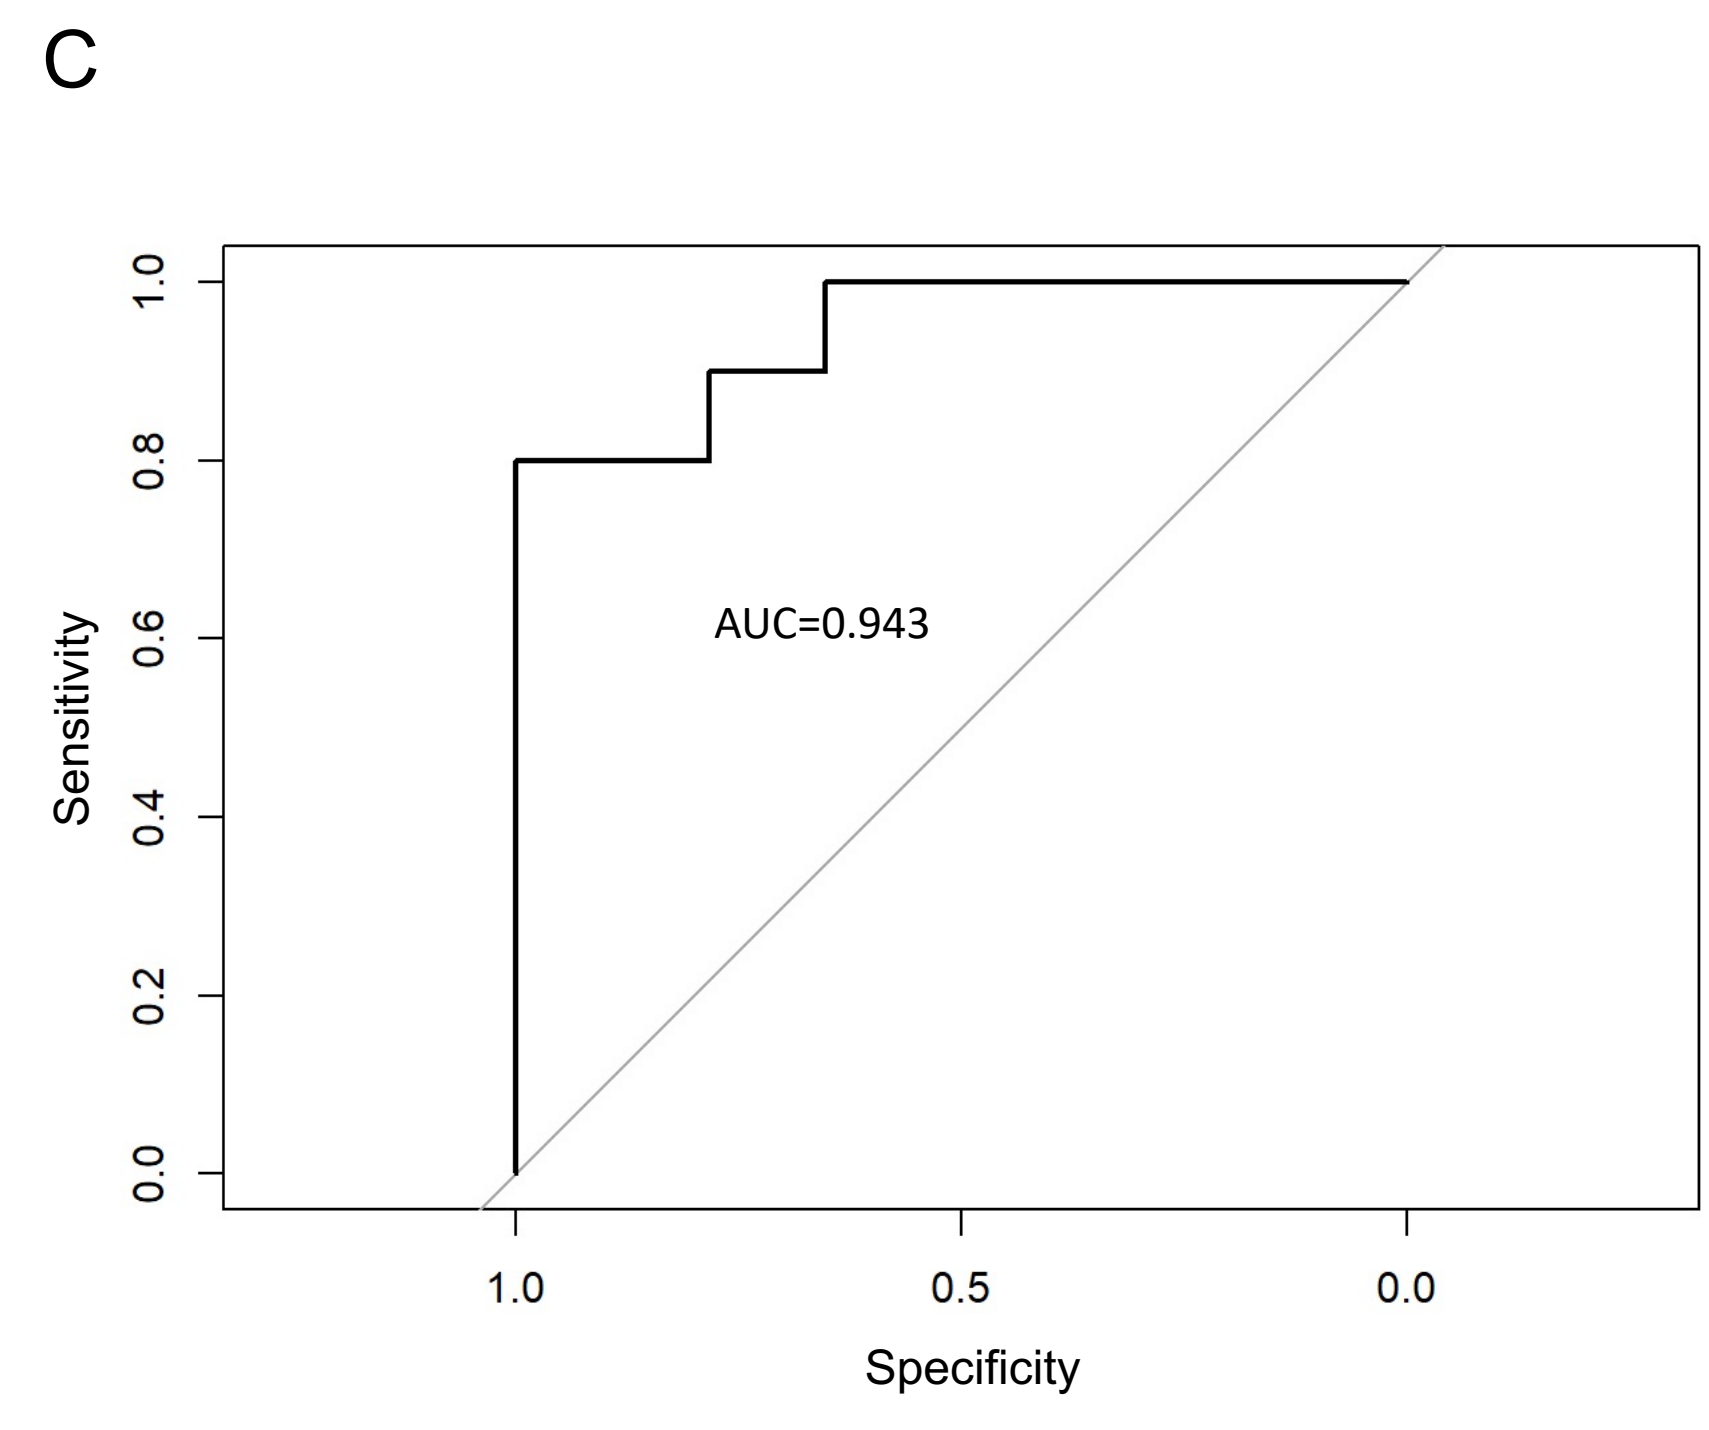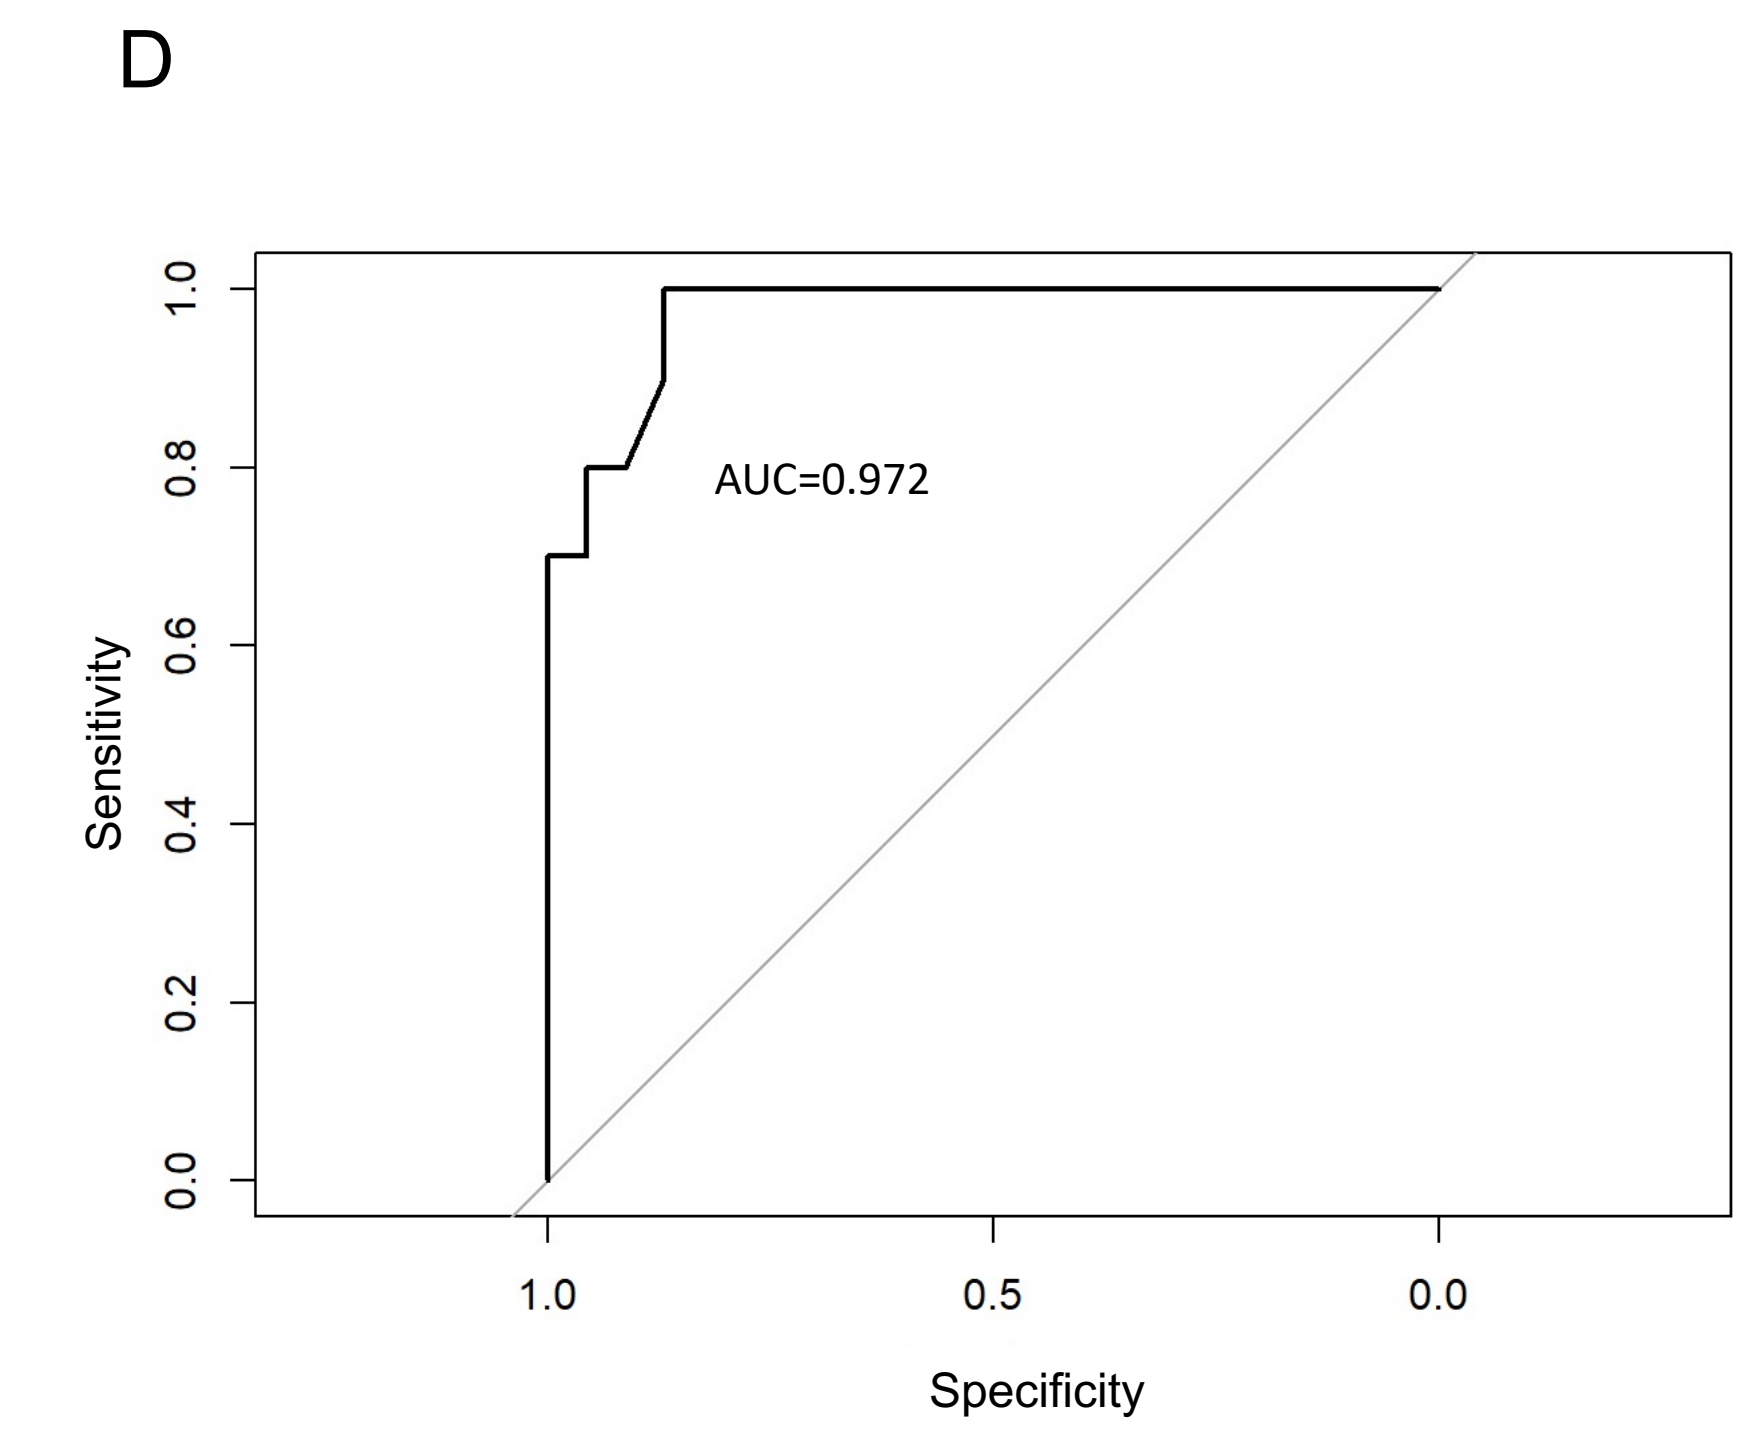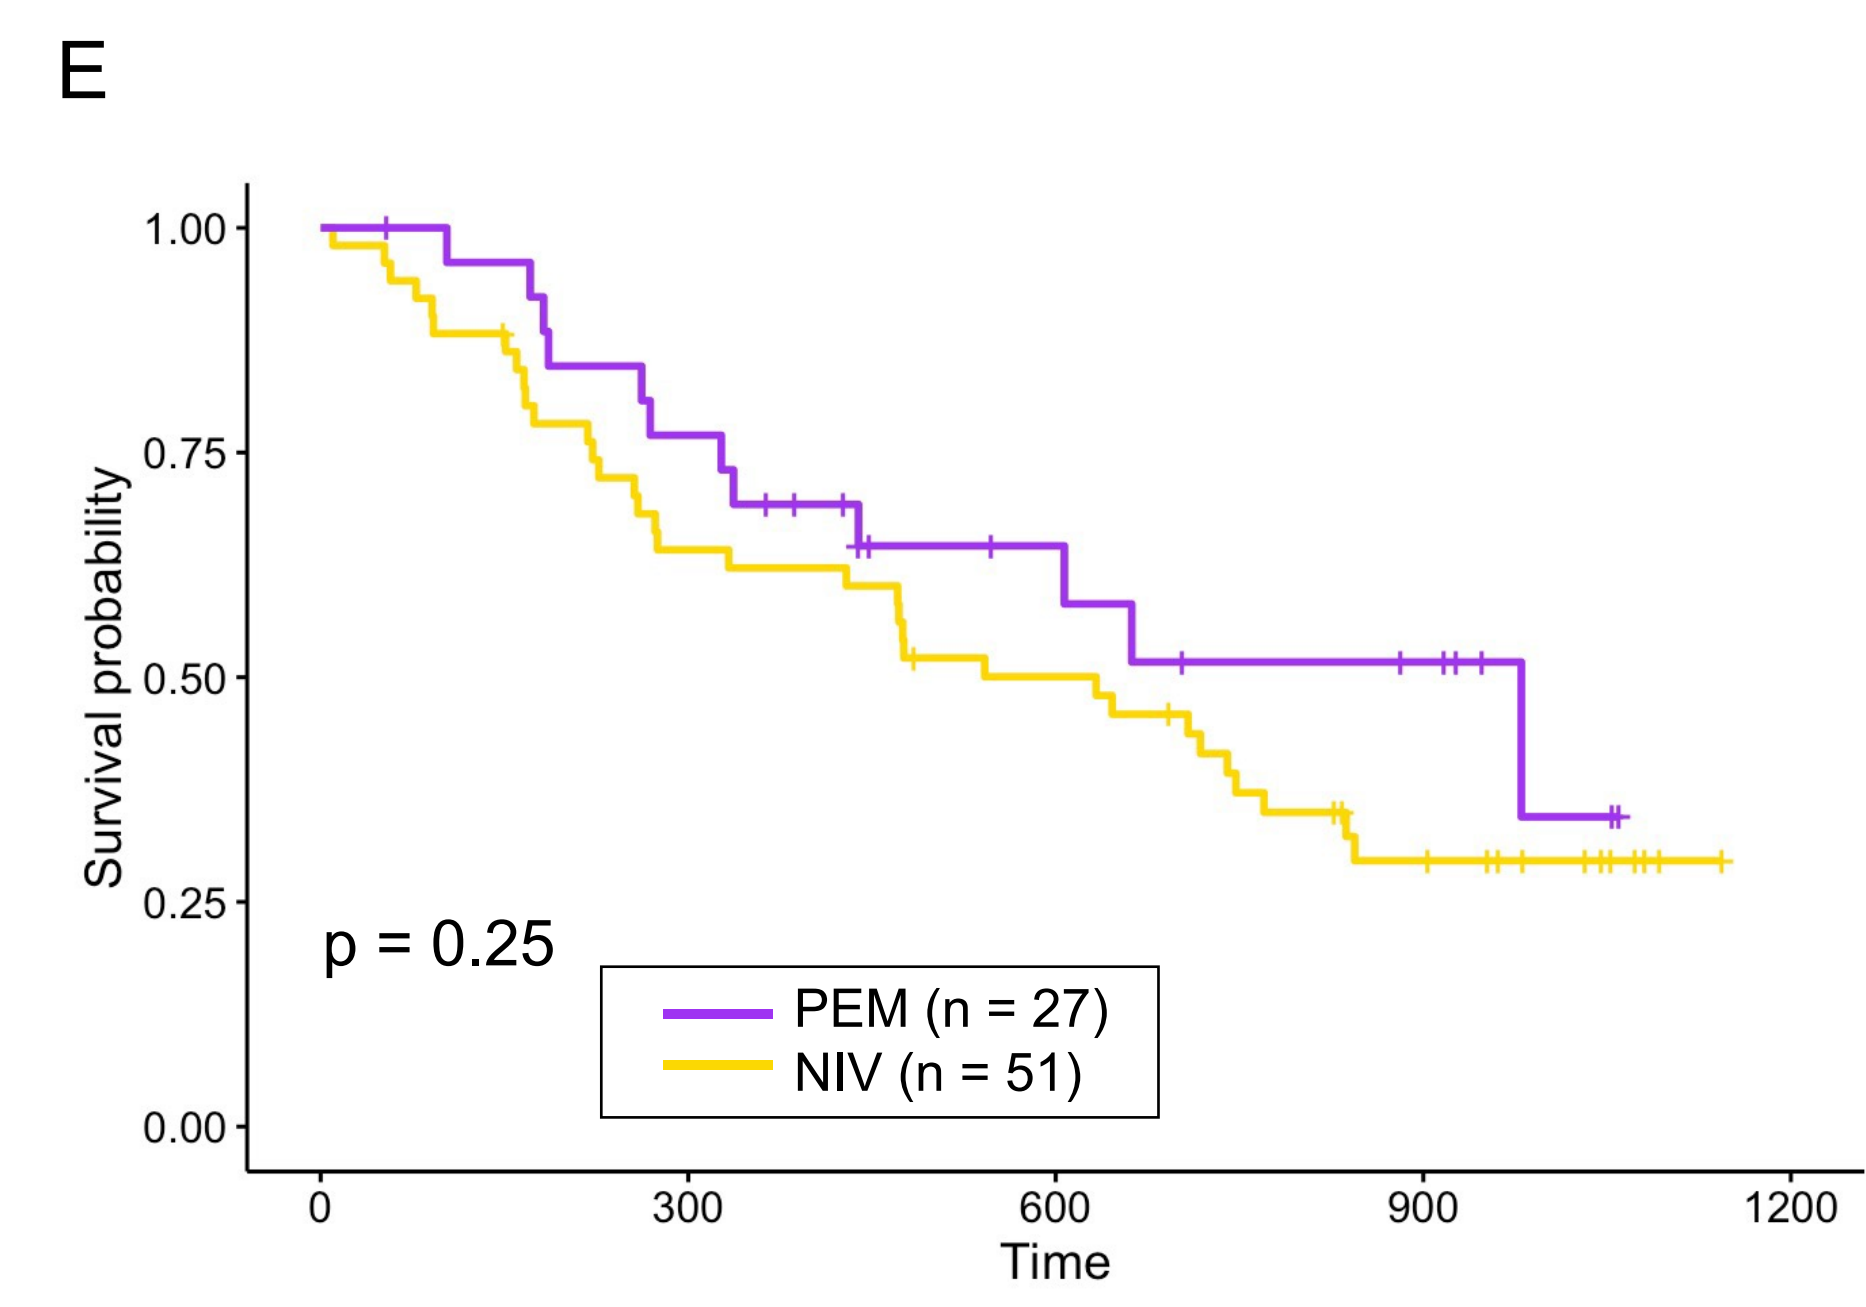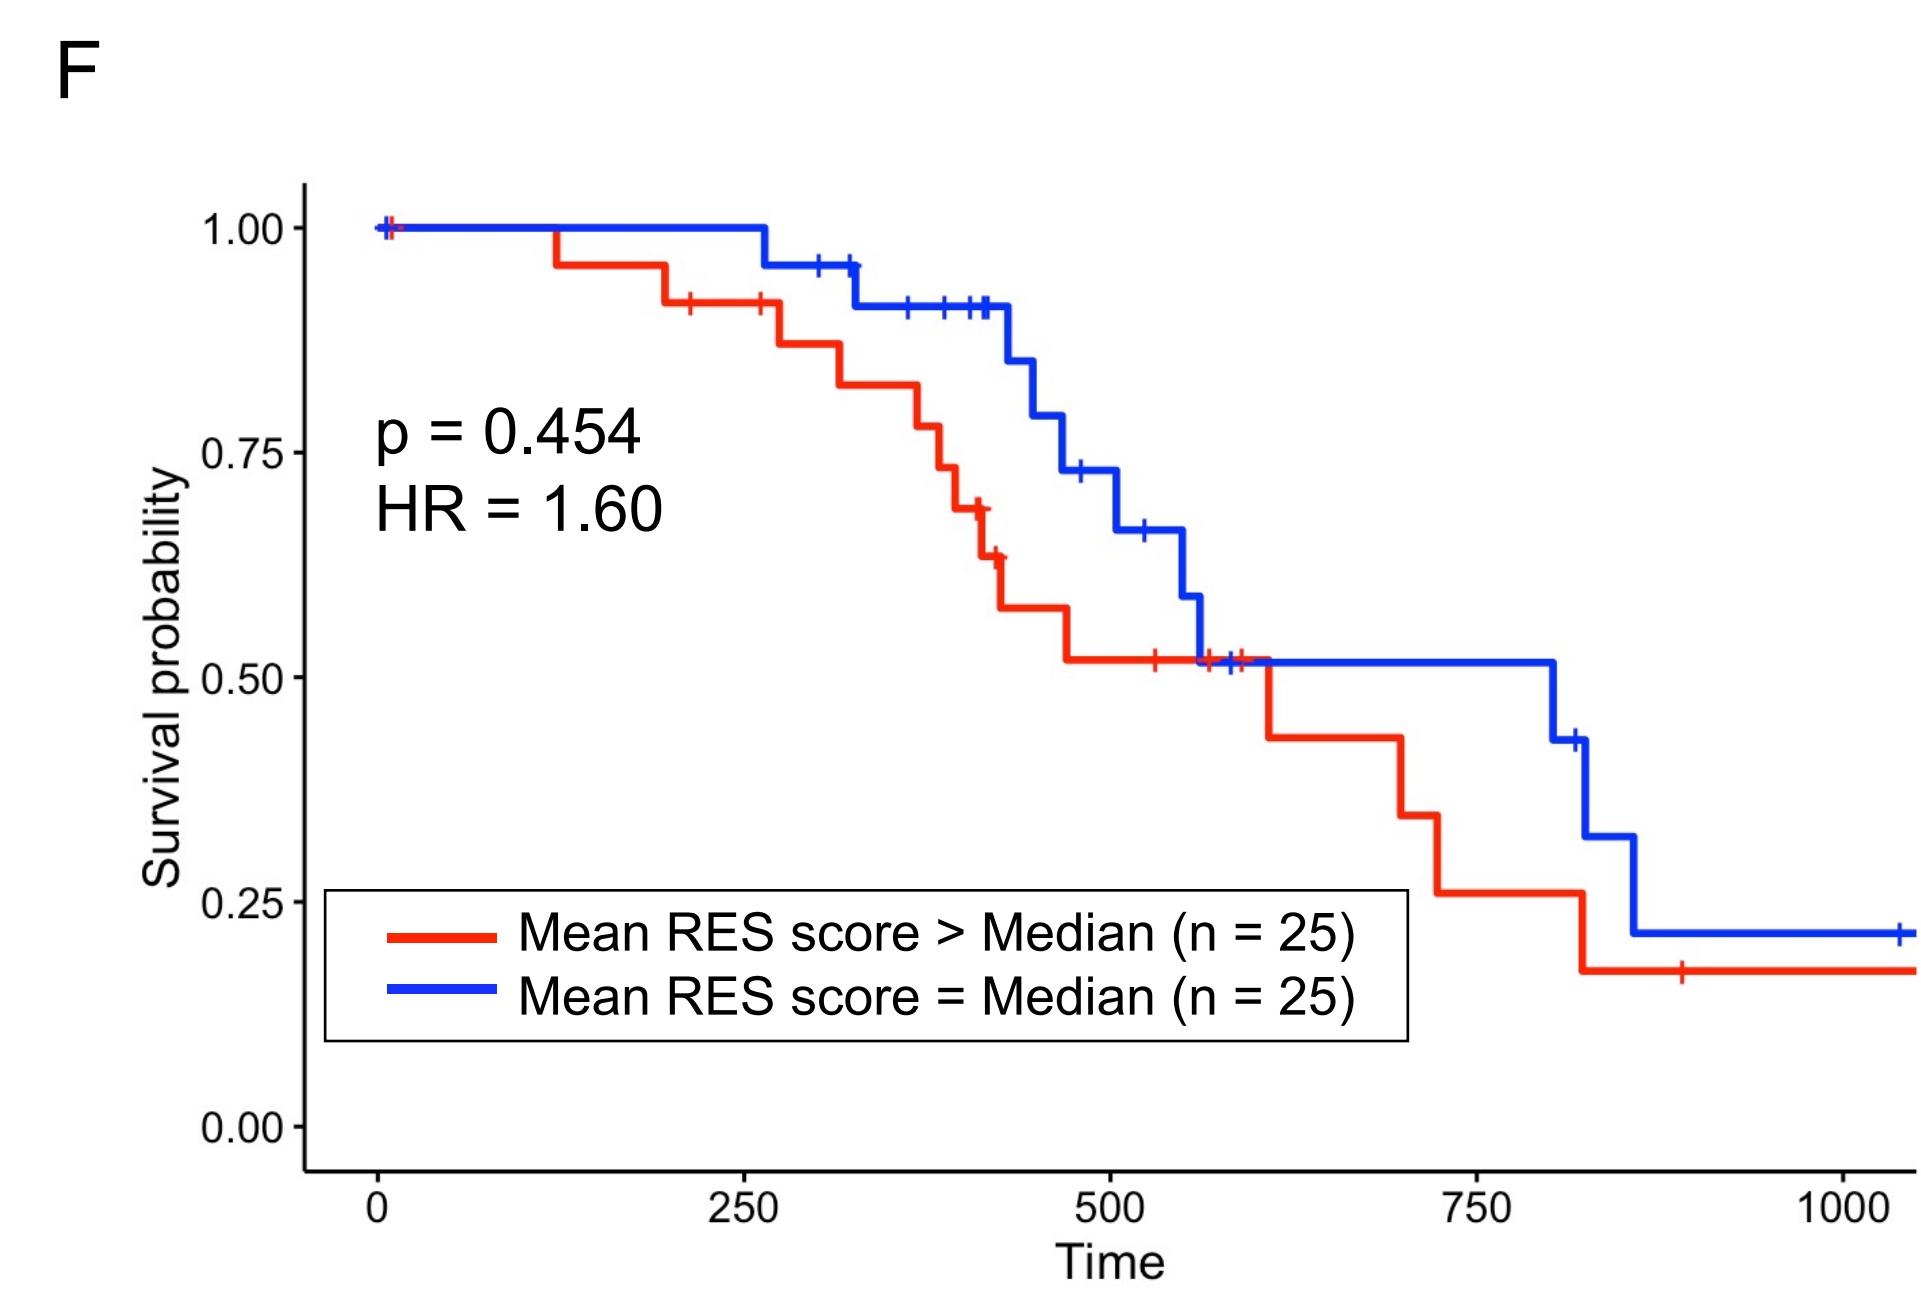

Figure S5

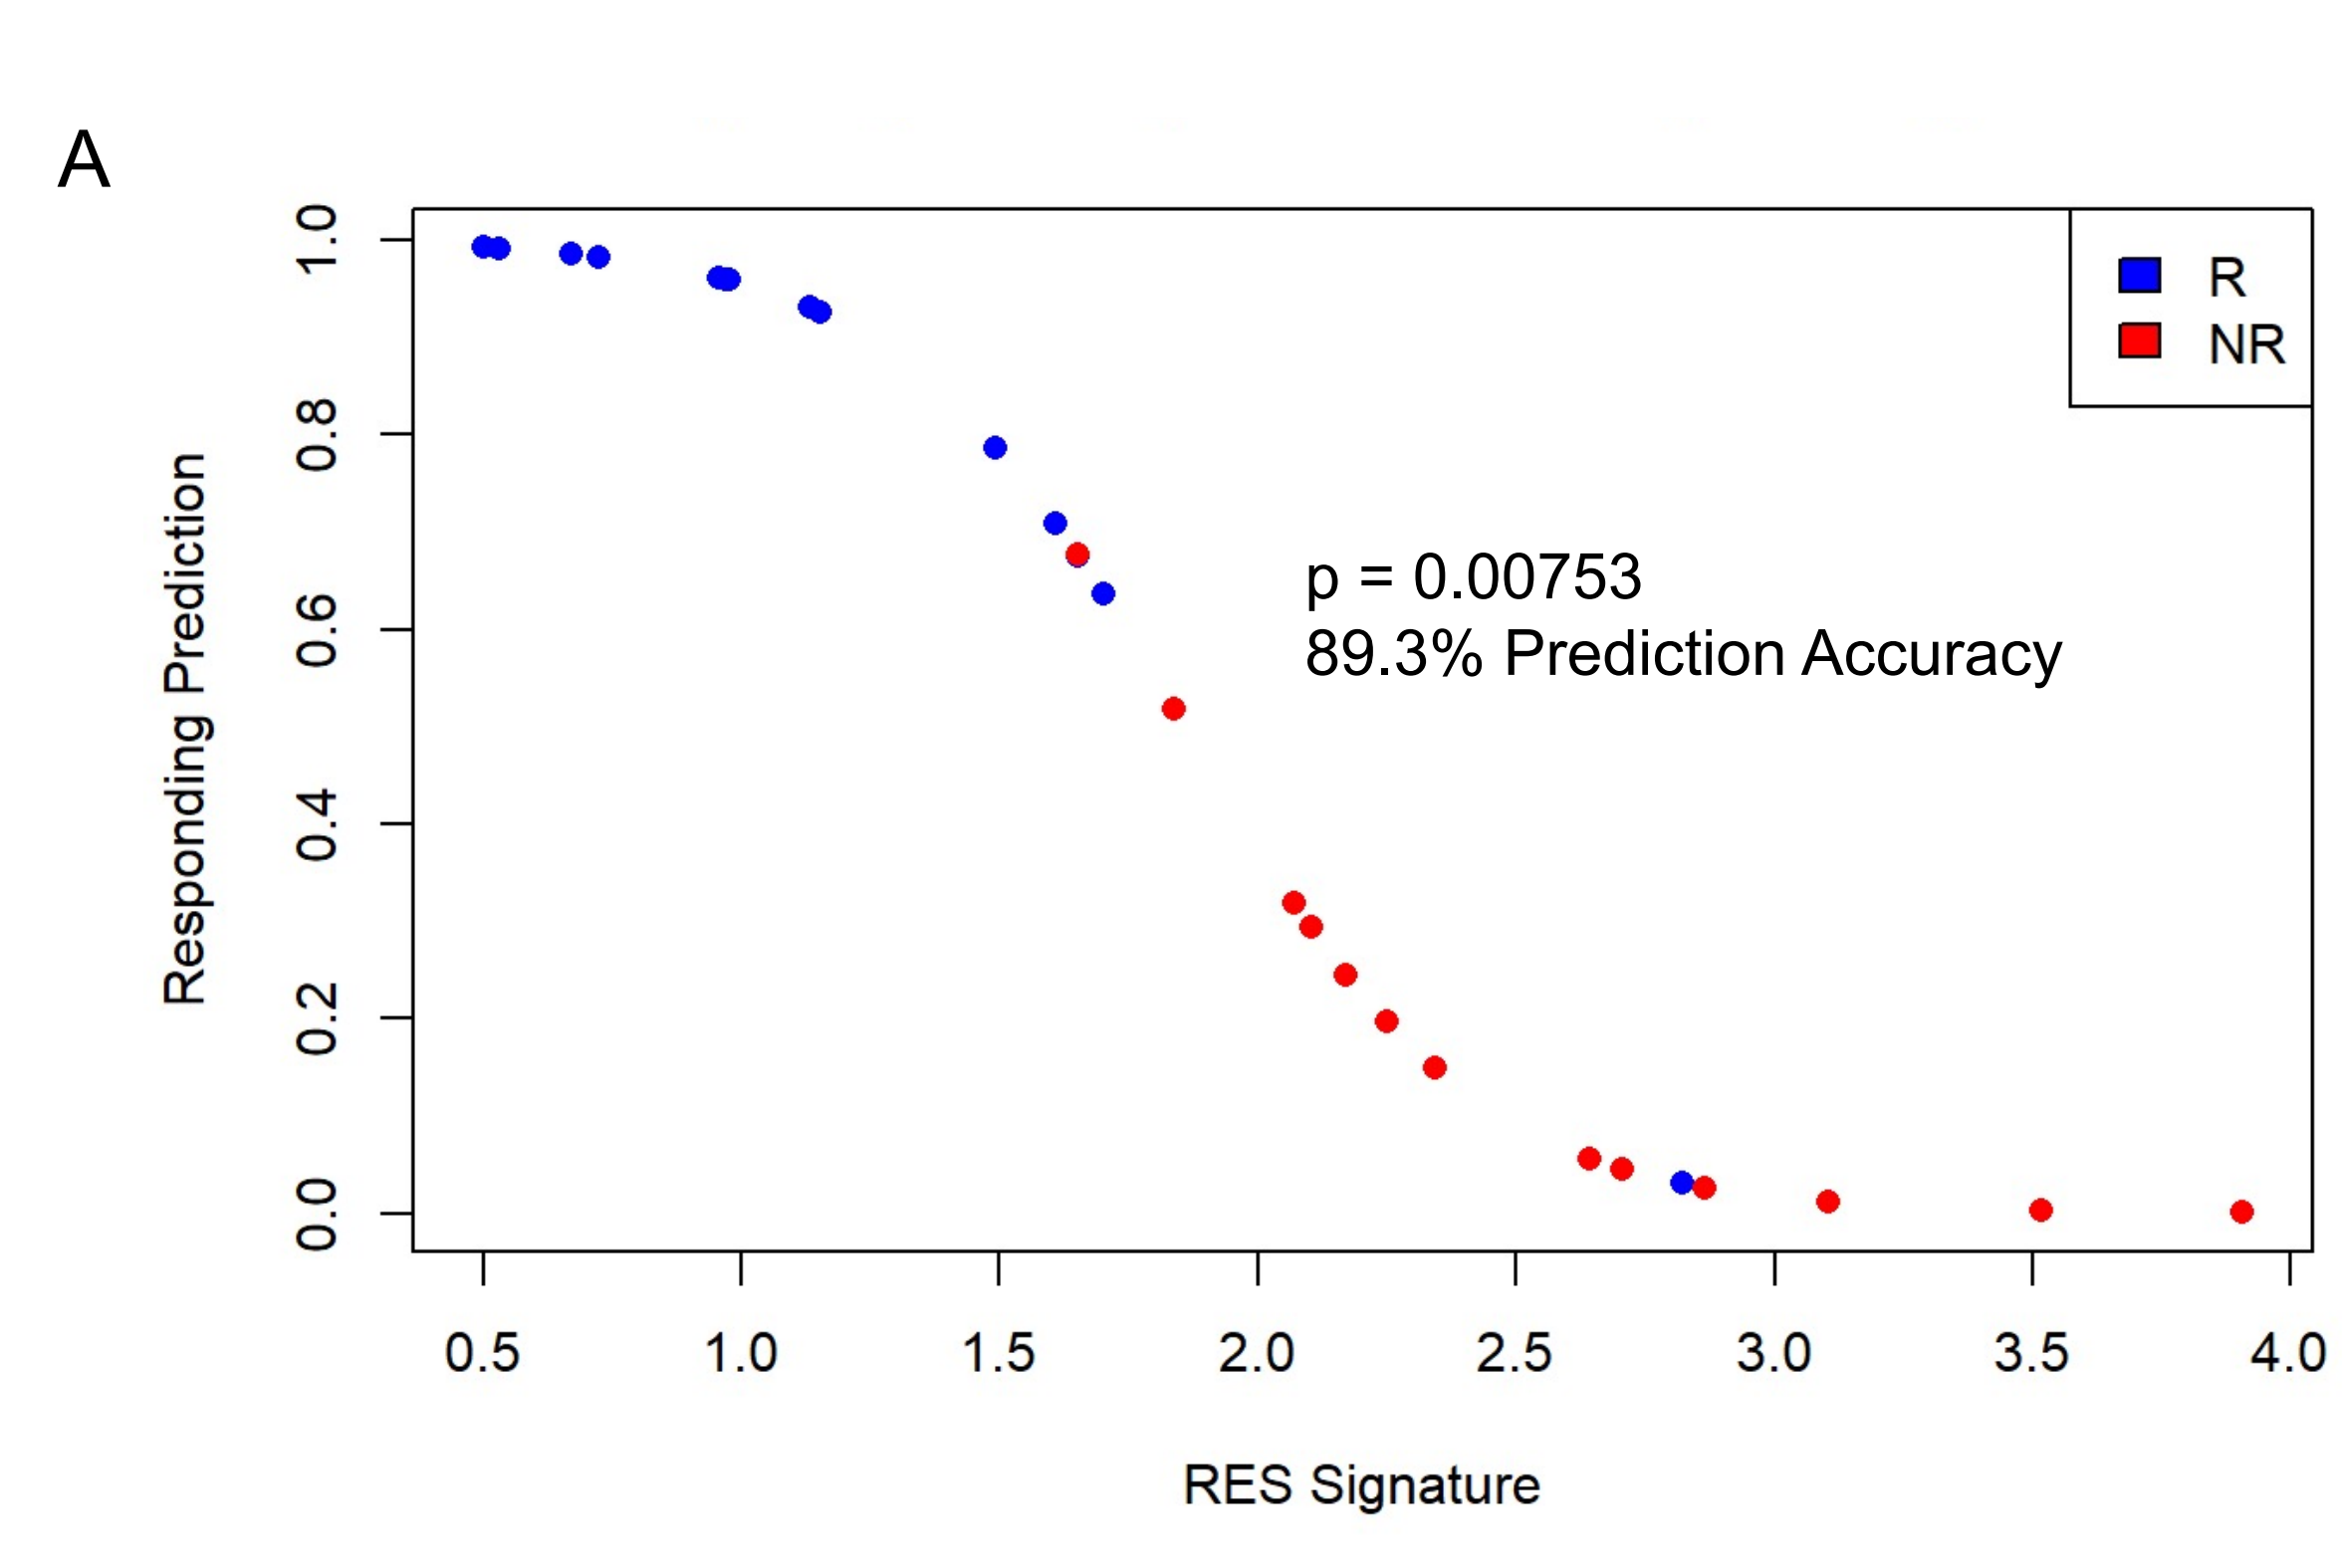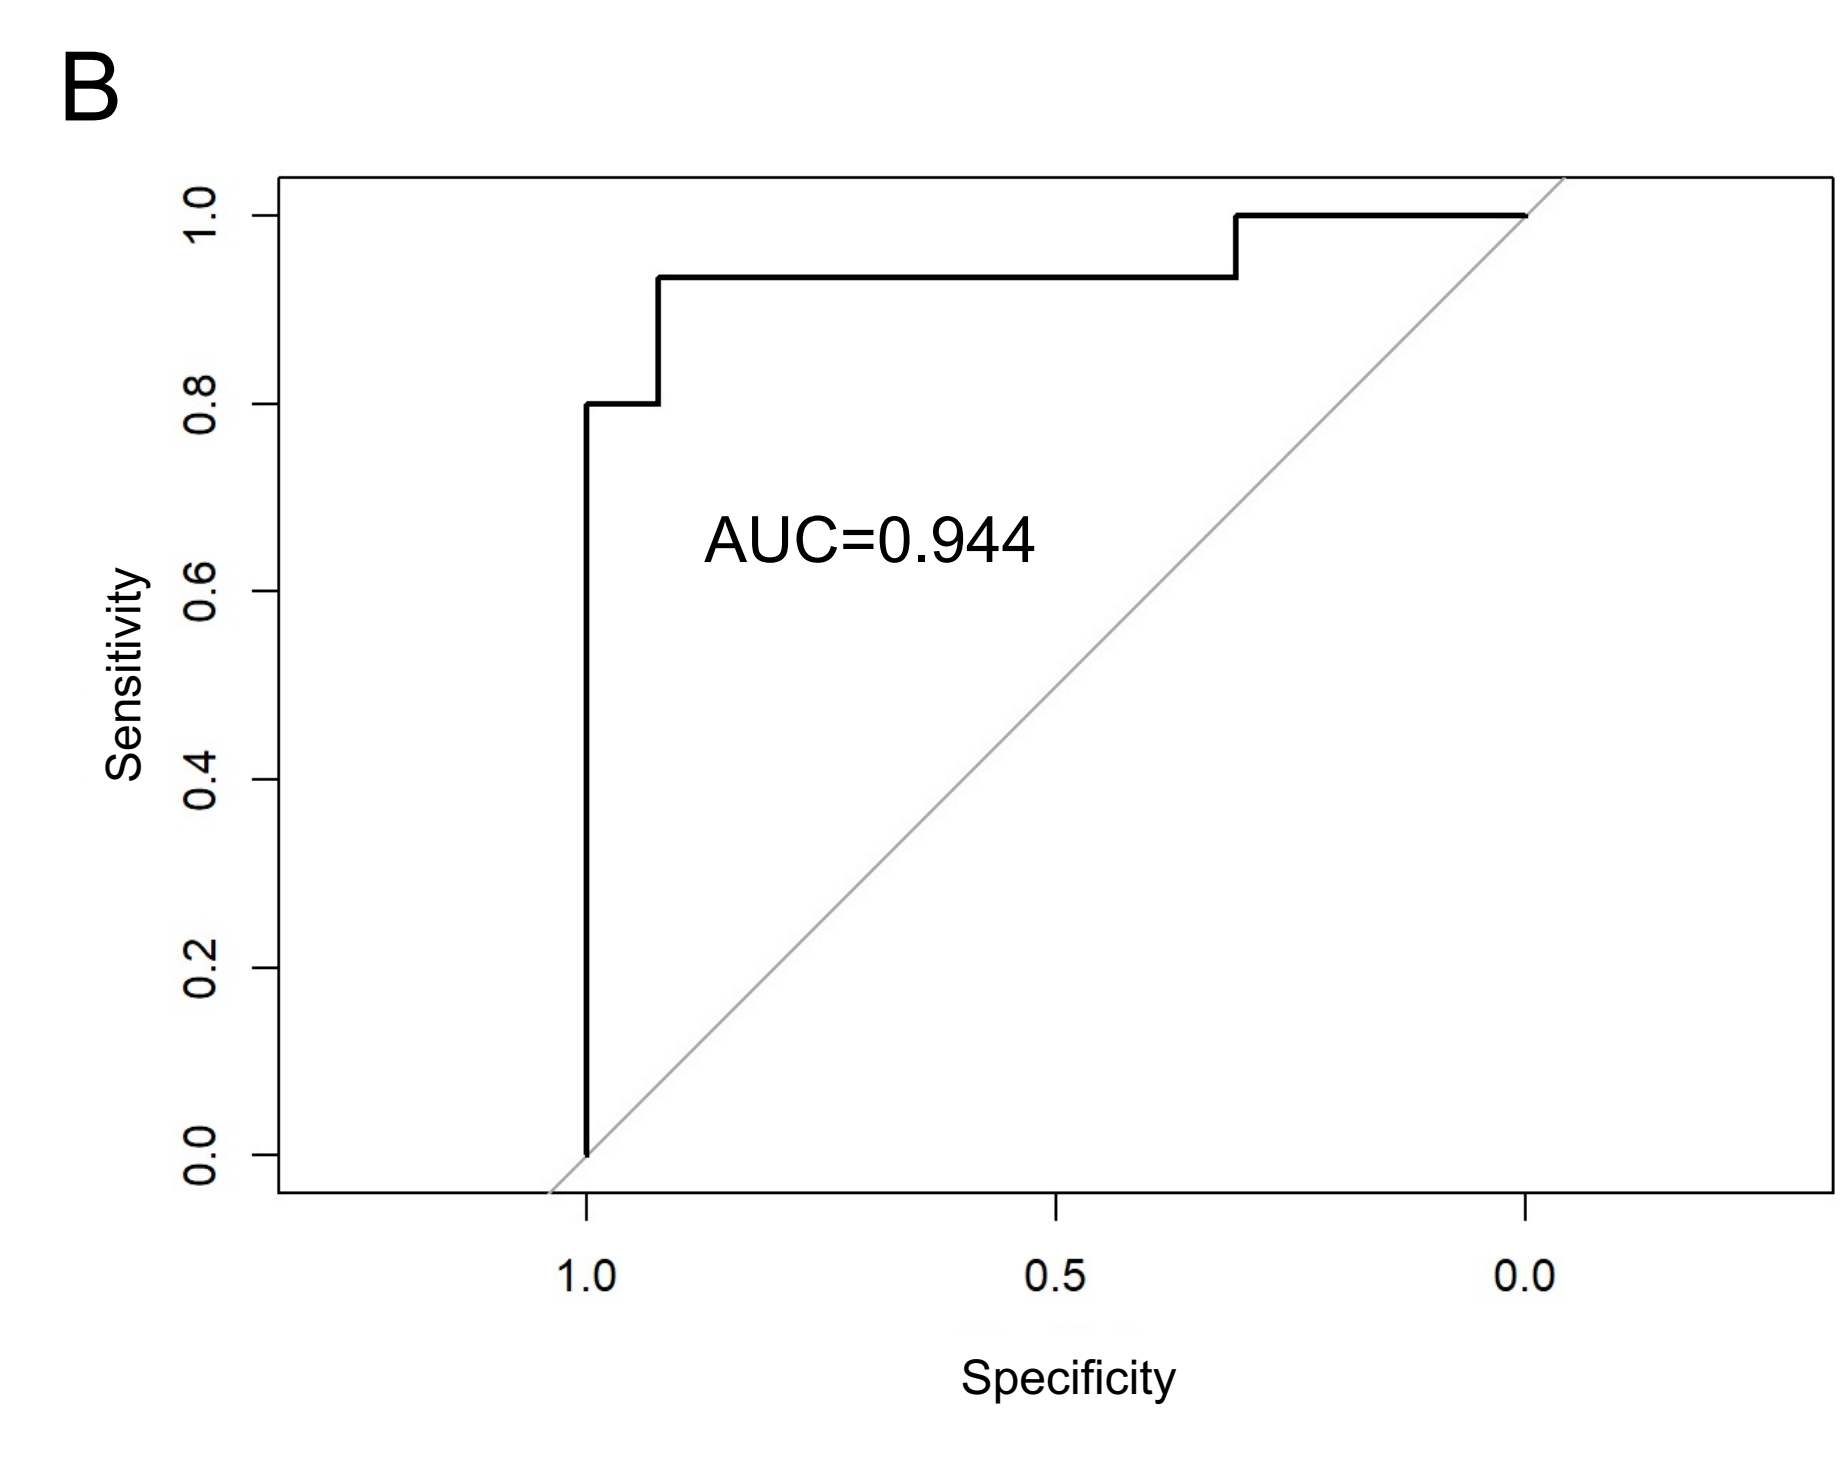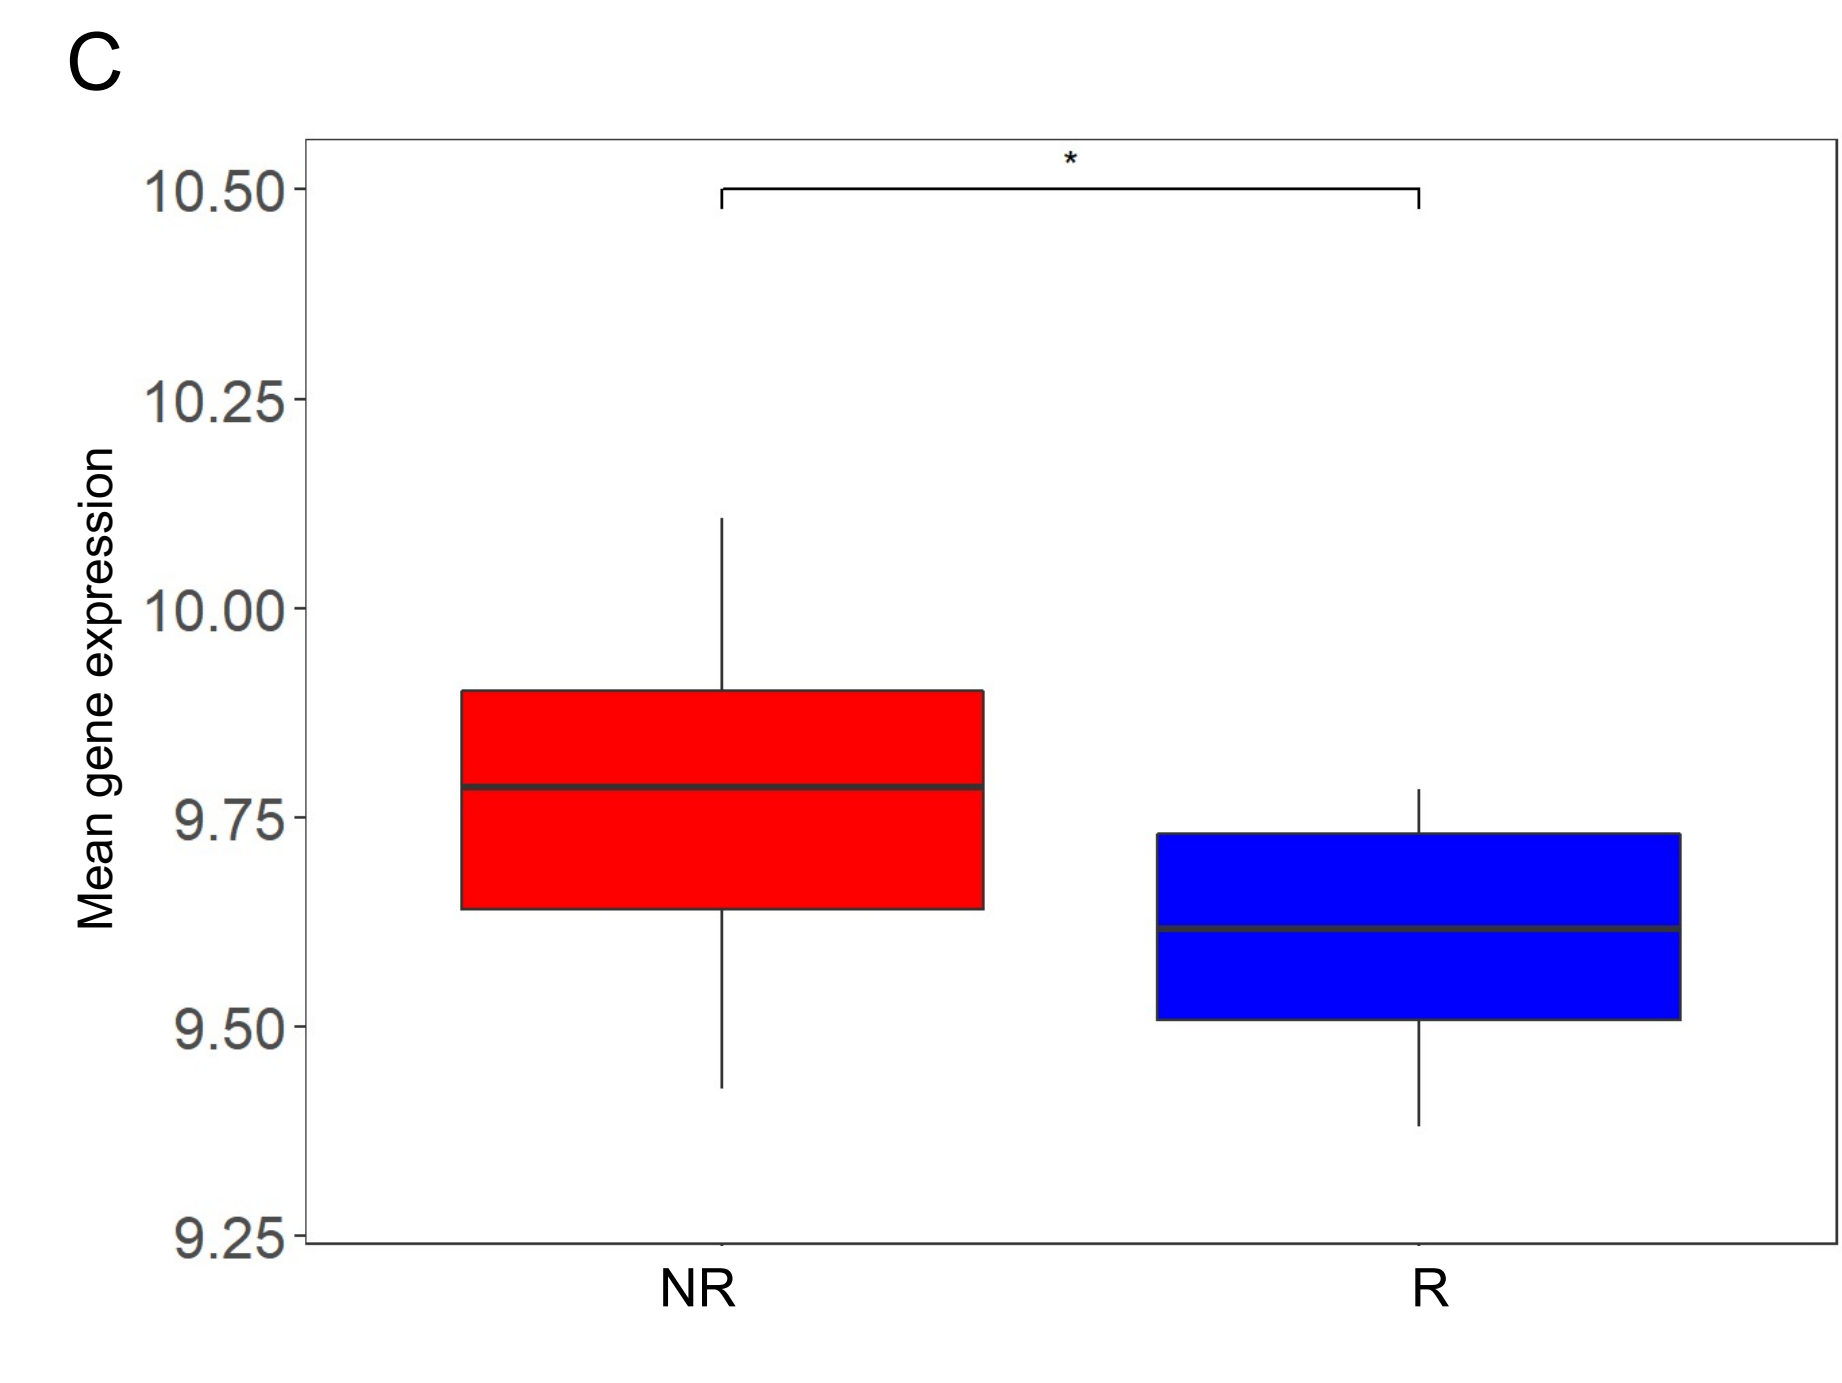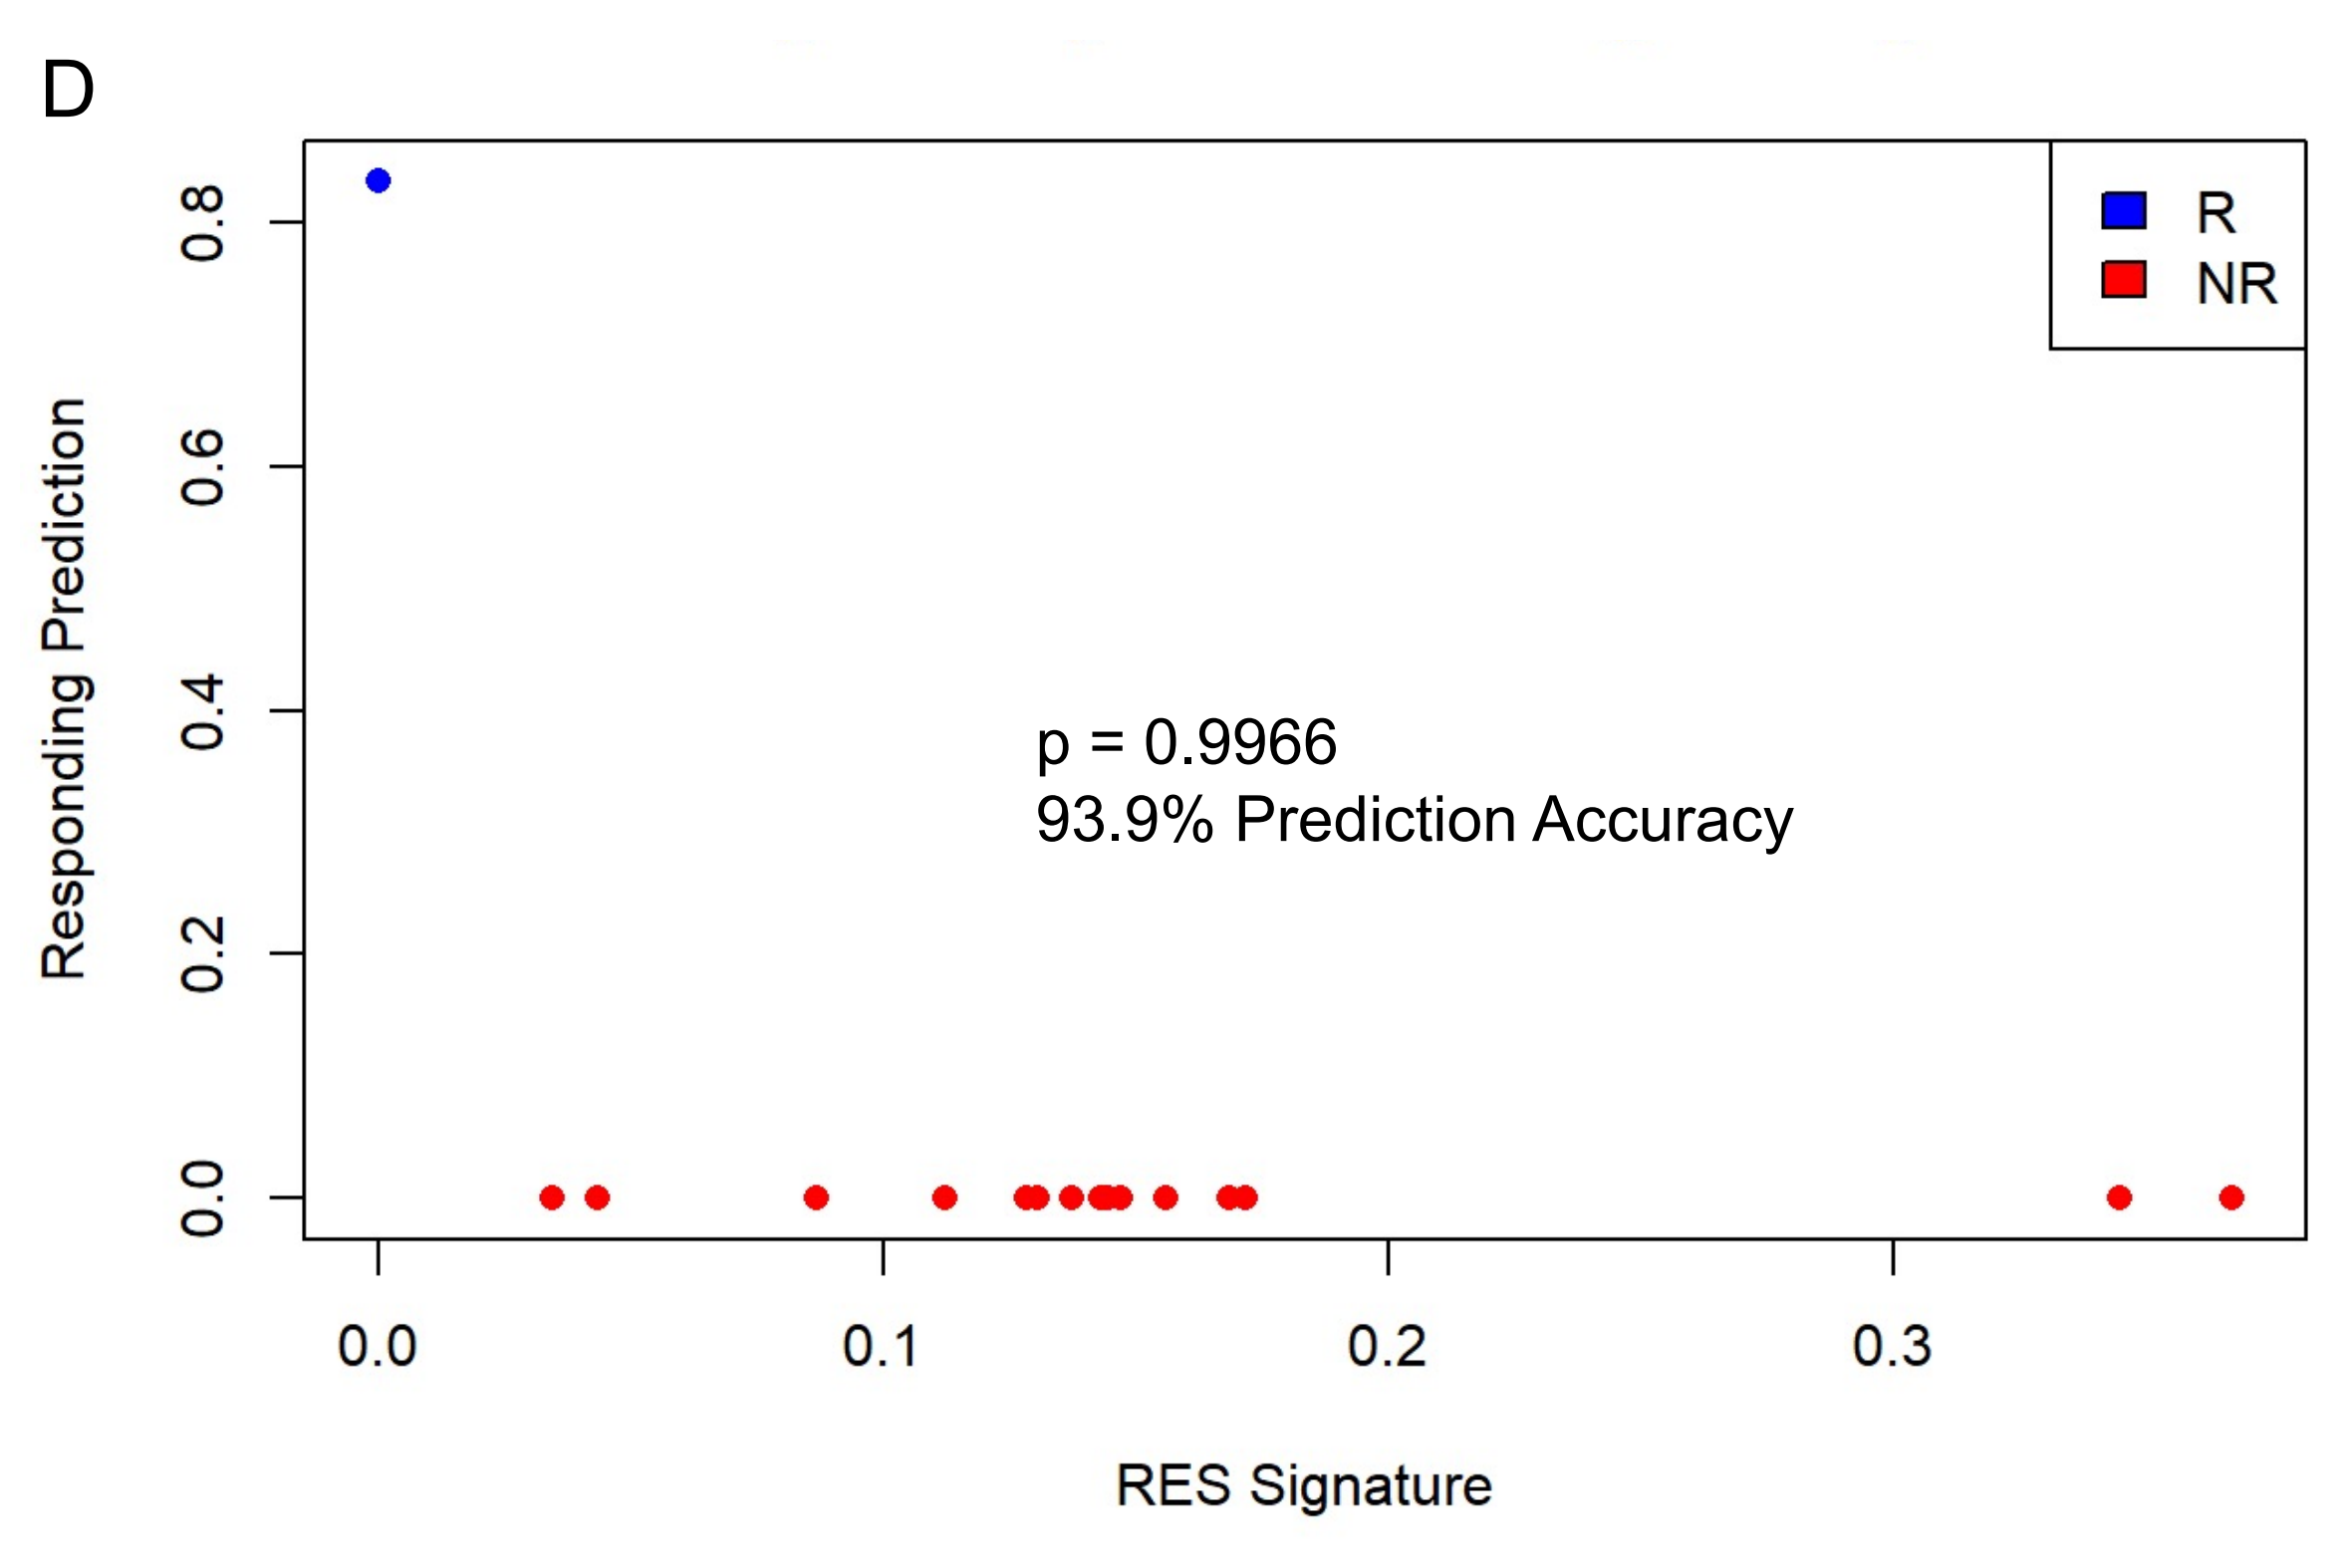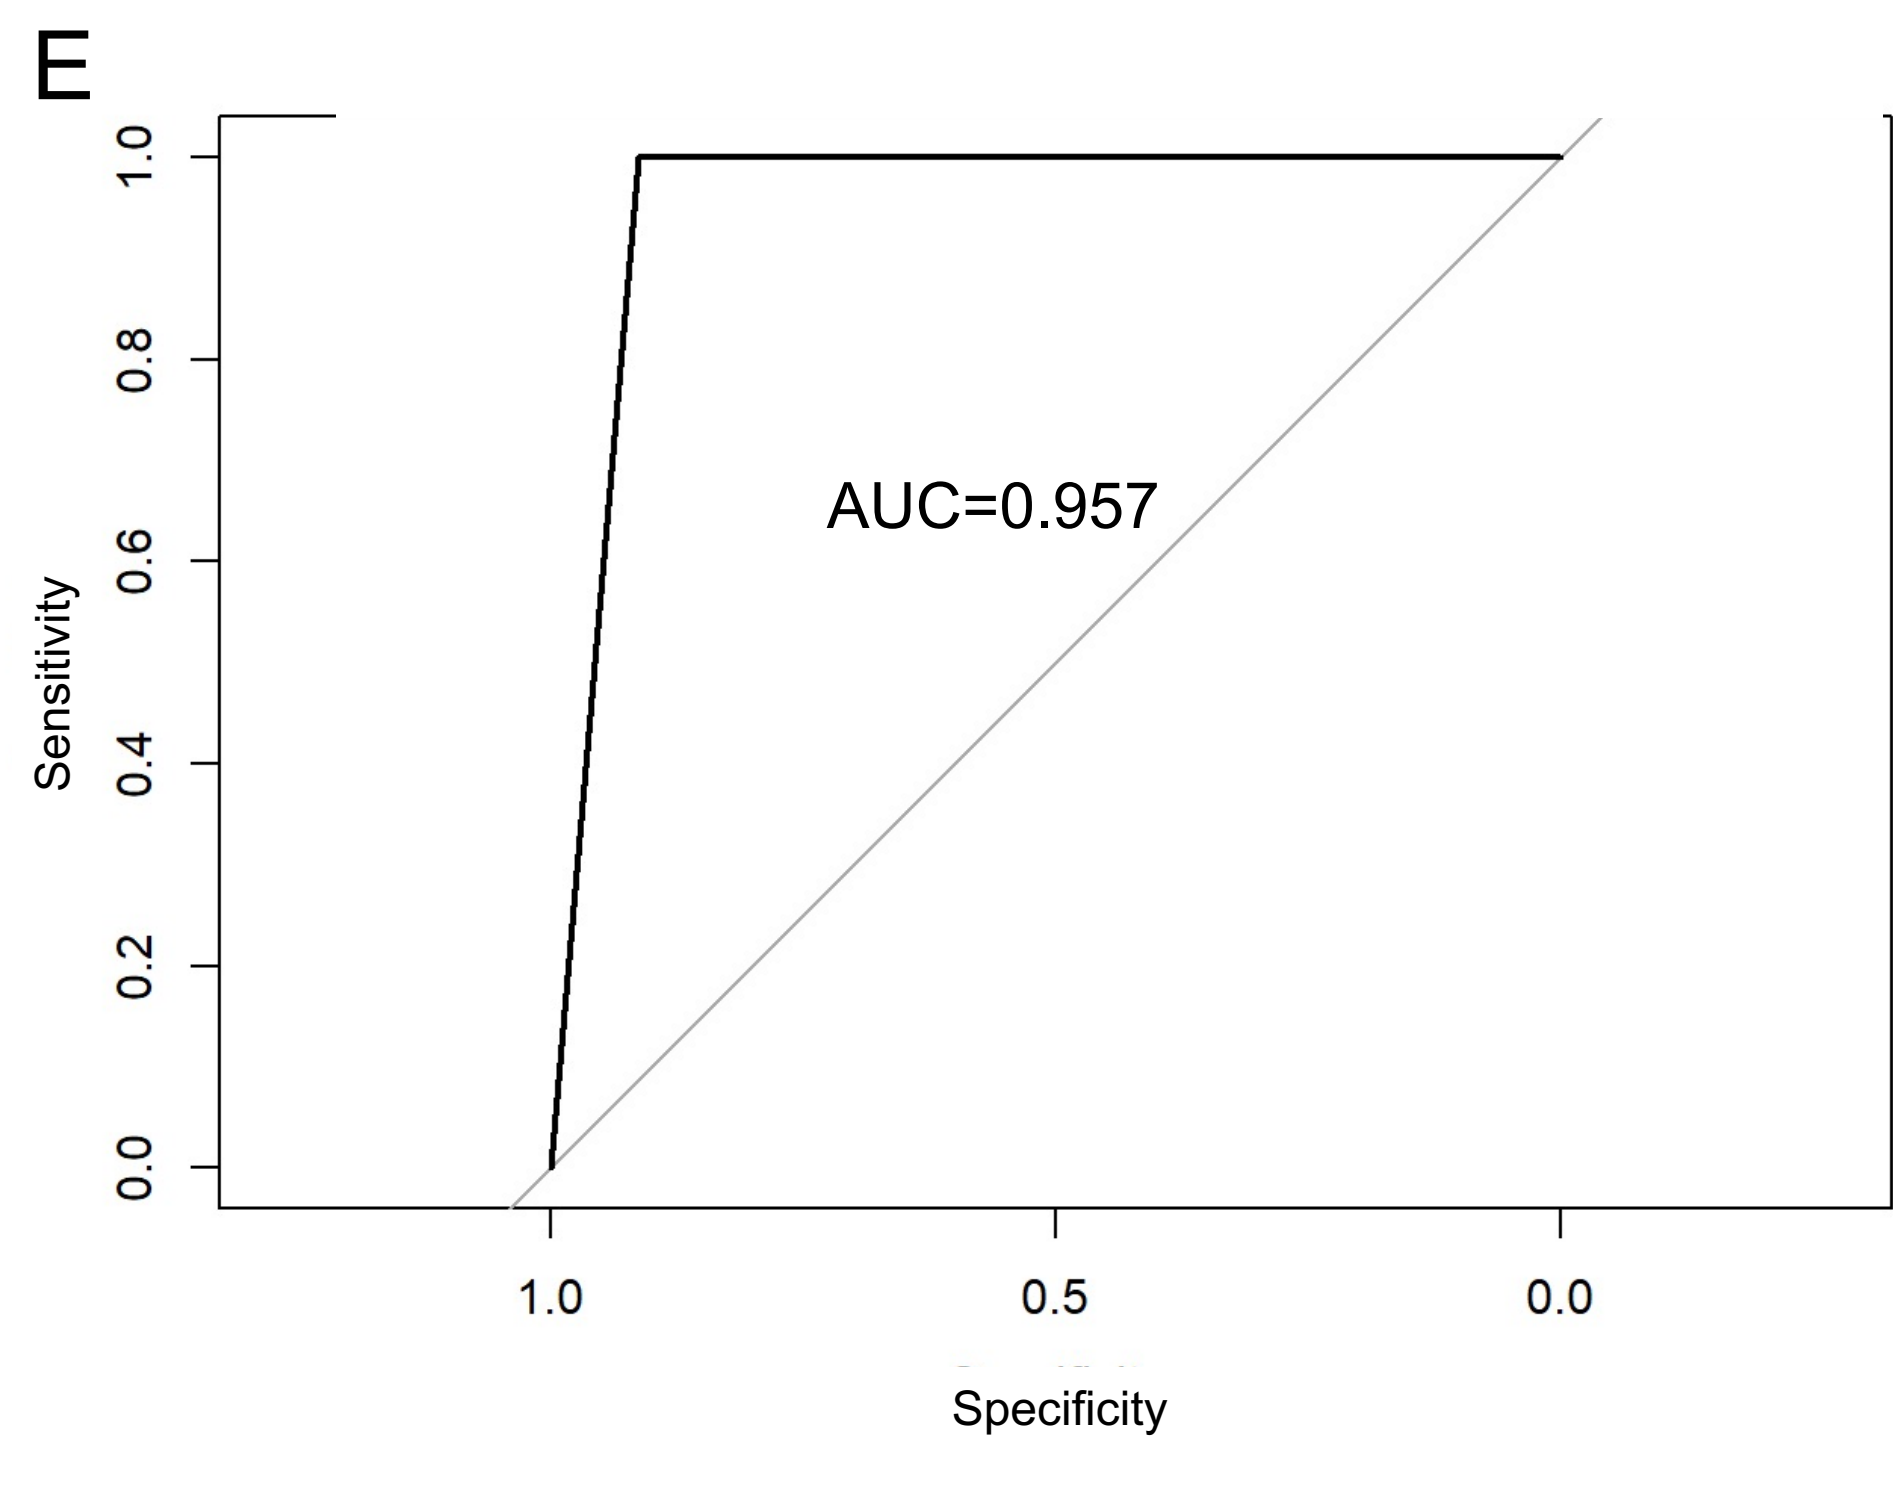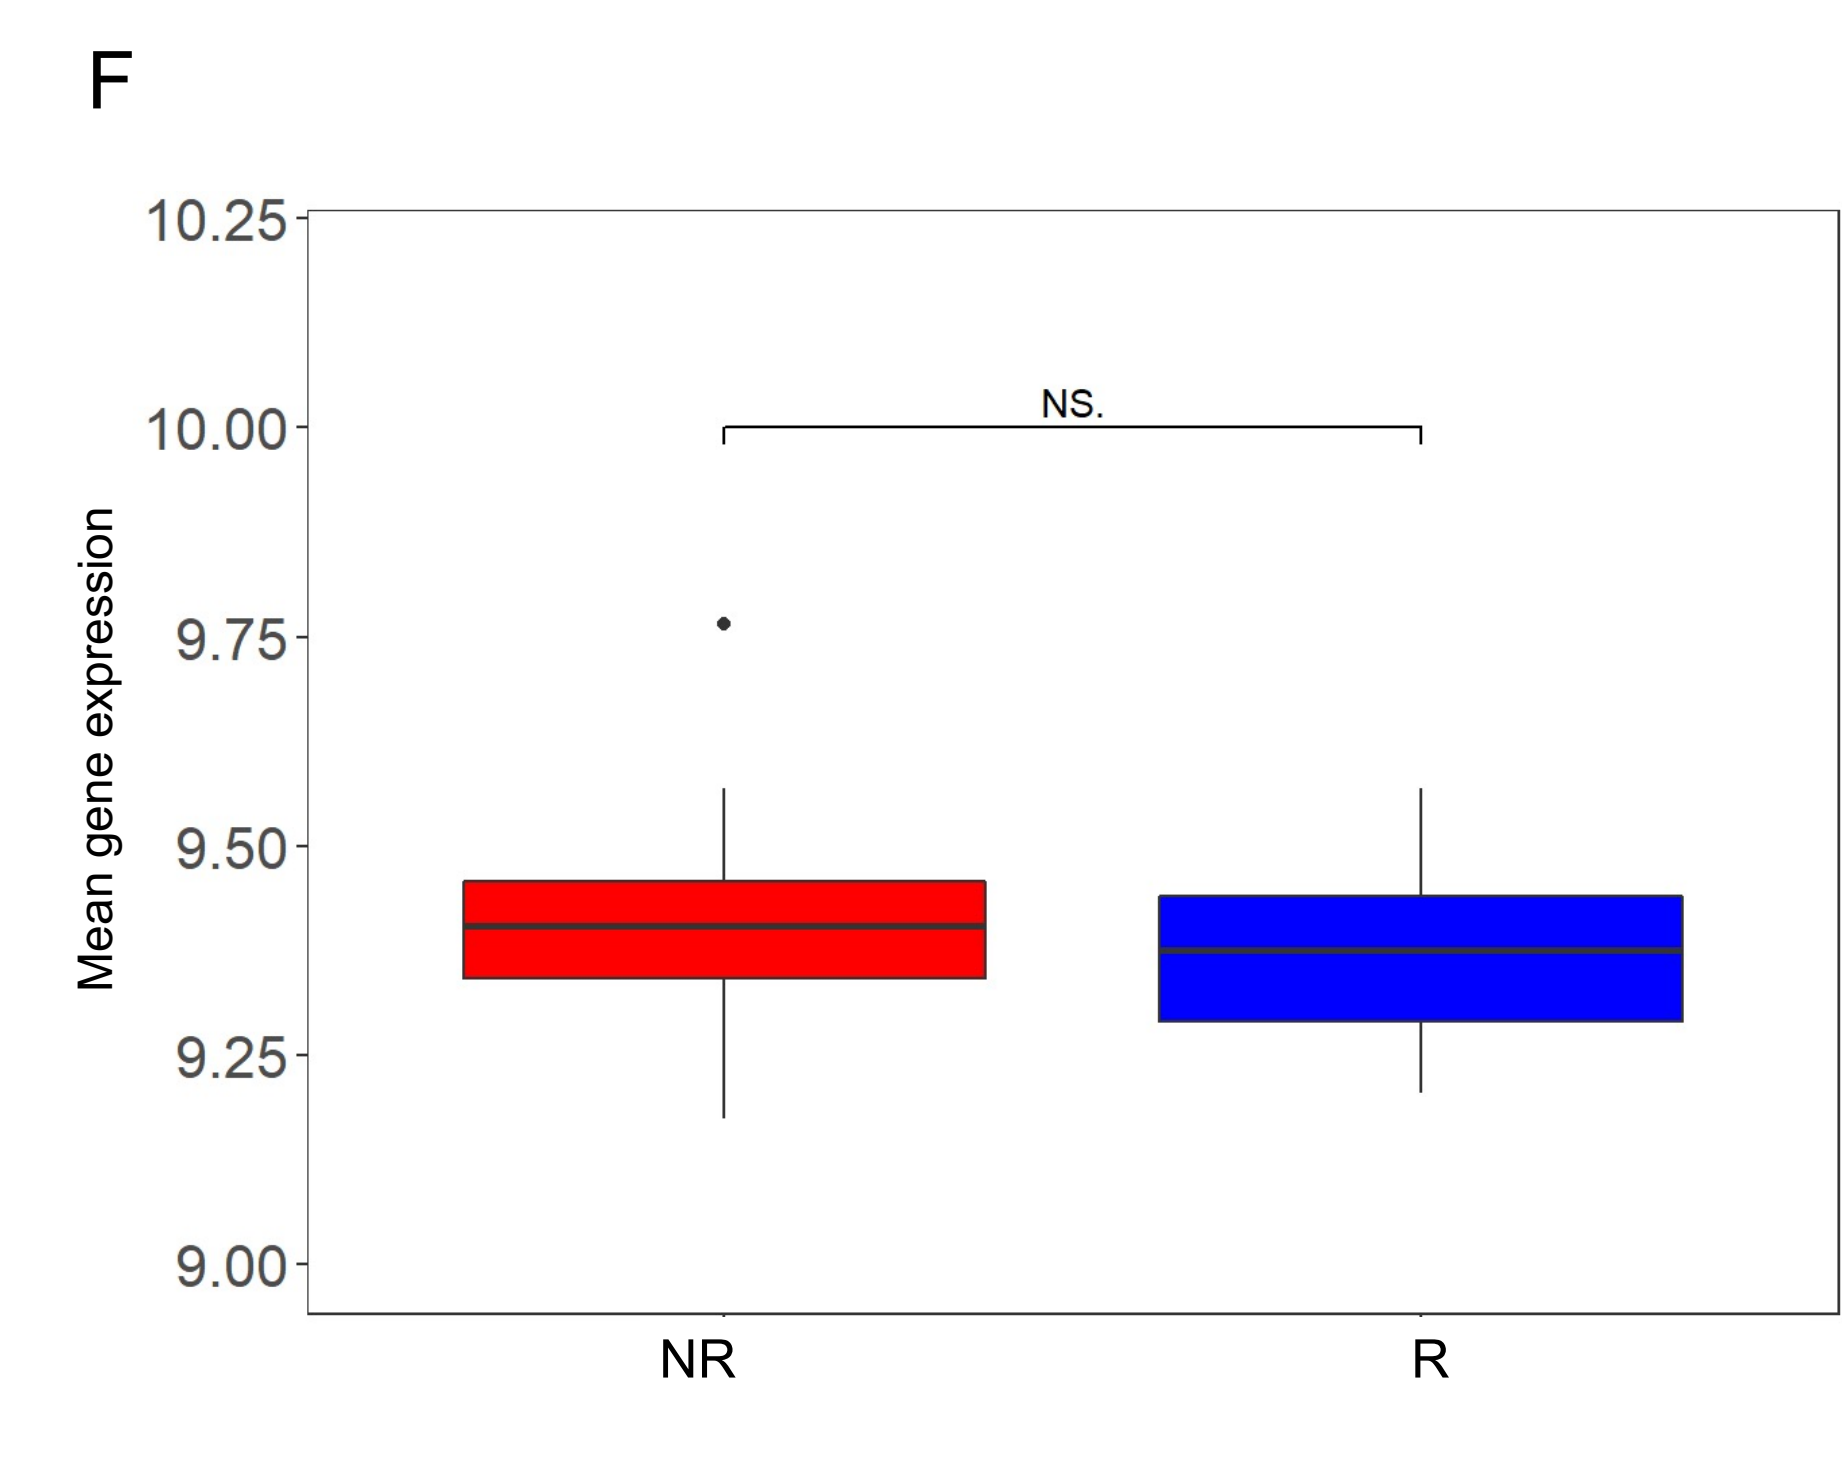

Figure S6

**Figure S1: RNA editing sites and unique genes per sample.** **A)** RNA editing sites identified per sample from Pembrolizumab treated patients. **B)** Genes identified per sample from Pembrolizumab treated patients. **C)** RNA editing sites identified per sample from Nivolumab treated patients. **D)** Genes identified per sample from Nivolumab treated patients.

**Figure S2: Major RNA editing transitions by dataset.** **A)** AG, TC, GA, and CT transitions from Pembrolizumab treated patients. **B)** AG, TC, GA, and CT transitions from Nivolumab treated patients.

**Figure S3: Average RNA editing sites identified per gene.** **A)** Average RES per gene for Pembrolizumab treated patients. **B)** Average RES per gene for Responders in Pembrolizumab treated patients. **C)** Average RES per gene for Non-Responders in Pembrolizumab treated patients. **D)** Average RES per gene for Nivolumab treated patients. **E)** Average RES per gene for Responders in Nivolumab treated patients. **F)** Average RES per gene for Non-Responders in Nivolumab treated patients.

**Figure S4: Gene expression levels of RES containing genes do not correlate with outcome.** **A)** Expression levels of 13 predictive genes that contain up-regulated RES scores in the Pembrolizumab treated patients. **B)** Expression levels of 248 predictive genes that contain down-regulated RES scores in the Pembrolizumab treated patients. **C)** BRAF mutations in responding and non-responding Pembrolizumab patients. **D)** RAS mutations in responding and non-responding Pembrolizumab patients. **E)** Expression levels of 29 predictive genes that contain up-regulated RES scores in the Nivolumab treated patients. **F)** Expression levels of 41 predictive

genes that contain down-regulated RES scores in the Nivolumab treated patients. **G)** BRAF mutations in responding and non-responding Nivolumab patients. **H)** RAS mutations in responding and non-responding Nivolumab patients.

**Figure S5: Logistic regression models segregate patients based on up-regulated and down-regulated RES scores.**

**A)** ROC curves of 13 up-regulated RES score means from Pembrolizumab treated patients. **B)** ROC curves of 248 down-regulated RES score means from Pembrolizumab treated patients. **C)** ROC curves of 29 up-regulated RES score means from Nivolumab treated patients. **D)** ROC curves of 41 down-regulated RES score means from Pembrolizumab treated patients. **E)** Survival analysis comparing Pembrolizumab and Nivolumab patient cohorts. **F)** Survival analysis of patients stratified by upper 50% (red) and lower 50% (blue) means of 44 signature genes from 50 sampled patients of TCGA-SKCM cohort. **\*\*p**<0.01.

**Figure S6: Logistic models and ROC curves segregate patients from both cohorts based on 46 signature genes.**

**A)** Logistic regression models from Pembrolizumab treated patients for 46 signature RES score means and responding prediction for responder (R, blue) and non-responder (NR, red) patients. **B)** ROC curves of signature RES score means from Pembrolizumab treated patients. **C)** Mean gene expression of signature genes from Pembrolizumab treated patients. **D)** Logistic regression models from Nivolumab treated patients for 46 signature RES score means and responding prediction for responder (R, blue) and non-responder (NR, red) patients. **E)** ROC



curves of signature RES score means from Nivolumab treated patients. **F)** Mean gene expression of signature genes from Nivolumab treated patients.
